# Supplementary material
Source: PubMed Central journal article supplement (PMC6075671)
Supplement: NIHMS962493-supplement-3.pdf [file NIHMS962493-supplement-3.pdf]

## Supplementary Note 1

### Filtering to improve TSS peak identification

We incorporated two additional analysis steps to ensure that our peak calling results accurately represented lab method performance. First, we evaluated whether specialized filtering programs improved the specificity and precision of each method. All methods, except Oligo capping and GRO-cap, will sometimes add a G base not present in the genome at the 5' end of the sequence read because reverse transcriptase tends to use the 5' 7-methylguanosine (m<sup>7</sup>G) cap as a template. We found improved precision with CapFilter<sup>14</sup>, which removes peaks containing less than a set percentage of reads with an extra G base at the 5' end of the read (**Supplementary Fig. 2**). We used it with a threshold of 20% extra G reads for all subsequent analysis in this study. We also tested the strand invasion<sup>25</sup> and RAMPAGE second read<sup>10</sup> filters, which did not substantially improve performance of the relevant lab methods (**Supplementary Fig. 3a,b**).

Second, in our initial peak calling analysis, we observed low sensitivity for all methods due to a high level of apparent false negatives compared to in the UCSC annotation<sup>8</sup> (**Supplementary Fig. 4**, dark blue bars). This was expected because transcripts that are expressed in our K-562 sample should reflect only a subset of all annotated TSSs. We therefore considered K-562 specific annotations, previously generated by DNase-Seq<sup>26,27</sup>, which identifies genomic regions with open chromatin such as promoters, and removed from consideration those TSS peaks without a DNase-Seq peak in K-562 cells, because these are likely to be TSSs that are not active in K-562 cells (true negatives). We used this filtered annotation set in all subsequent analyses.

## Supplementary Note 2

### TSSs at single base resolution

With 5' RNA-Seq data, it is possible to determine a TSS at single base resolution. Previous studies have shown that the initiator sequence at the -1 and +1 position relative to the TSS is most often a pyrimidine and purine, respectively<sup>34, 35</sup> and has been shown to be true for TSSs categorized as narrow or broad. In our datasets, we observe this pyrimidine and purine pattern, though the methods do differ to some extent in their biases for the bases in these positions (**Supplementary Fig. 8a,b**). Finding explanations for these differences is beyond the scope of this paper.

### **Supplementary Note 3**

#### **Reproducibility and gene expression quantification**

We also assessed reproducibility and gene expression quantification accuracy for each method. For CAGE,  $\geq 94\%$  of the peaks overlapped between any two pairs of libraries across four replicates (**Supplementary Fig. 9a**); for RAMPAGE,  $\geq 90\%$  of peaks in one technical replicate were present in the other; for STRT, 89% and 95% concurred between two replicates. The replicates had similar performance with respect to reads aligning near the 5' end of annotated transcripts (**Supplementary Fig. 9b**) and with ERCC spike-ins (**Supplementary Tables 2-4**). We did not perform replicates of the other protocols: for Oligo Capping, because the Tobacco Acid Pyrophosphatase (TAP) enzyme is no longer commercially available; for NanoCAGE-XL, because it performed relatively poorly. To identify differential TSS usage, it is important for methods to accurately measure relative levels of gene expression. Expression levels measured for replicates of each method correlated well, with CAGE and RAMPAGE performing best (Pearson's  $r=0.98-0.99$ , **Supplementary Fig. 10a-c**). We also compared the expression levels for each of the lab methods and standard RNA-Seq (**Supplementary Fig. 10d**). Expression levels

measured with CAGE and standard RNA-Seq were relatively well correlated (Pearson's  $r=0.86$ , **Supplementary Fig. 10d**), whereas RAMPAGE expression levels did not correlate as well ( $r=0.78$ , **Supplementary Fig. 10d**), which is in agreement with the expression levels measured for spike-in RNAs (**Supplementary Table 4**). While most of the methods correlate fairly well with each other, NanoCAGE-XL did not due, at least in part, to it not detecting expression of many genes and being sequenced less deeply (**Supplementary Fig. 10d**).

## **Supplementary Note 4**

### **Corroborative evidence for other methods**

In addition to CAGE, we also investigated how corroborative evidence supported TSSs identified with the other 5' end RNA-Seq methods. Similar to CAGE, methods with good precision, RAMPAGE, STRT, and NanoCAGE-XL (**Fig. 3**), have support for most false positive and intergenic peaks (**Supplementary Fig. 11**). For GRO-cap, we see that most peaks have support from H3K4m3 and DNase-Seq, but not annotation or the consensus of other methods (**Supplementary Fig. 11**). This finding agrees well with previous findings that GRO-cap can identify TSSs in less stable transcripts that might not be annotated or found by other methods<sup>17</sup>. Finally, Oligo capping, which has poor precision (**Fig. 3**), had much less support for false positive peaks (**Supplementary Fig. 11**).

## **Supplementary Note 5**

### **Discussion of excluded methods**

The following methods were excluded because of their similarities to other methods or other issues. We did not test 5' SAGE<sup>1</sup> because it is another template switching method similar to

STRT, except that it concatenates 5' tag sequences, TL-Seq<sup>2</sup>, TIF-Seq<sup>3</sup>, and paired-end analysis of TSSs (PEAT)<sup>4</sup> because they are variants of oligo capping, DLAF<sup>5</sup>, because it has limitations in recognizing weak alternative TSSs that might be present downstream from a strong TSS, Start-Seq<sup>6</sup>, which uses short, capped nuclear RNA derived from stalled transcripts rather than full-length mRNA, because it is an indirect method that provides inaccurate measurements of the levels of TSS usage and requires the TAP enzyme, and Exo-Seq<sup>7</sup>, which identifies 5' ends based on the m<sup>7</sup>G cap's protection from exonuclease digestion, because it was published too recently to be included in our study. Finally, we note that there are sometimes multiple versions of a method, such as for NanoCAGE<sup>8,9</sup> and CAGE<sup>10,11</sup>, and we tested only one of each.

1. Zhang, Z. & Dietrich, F.S. Mapping of transcription start sites in *Saccharomyces cerevisiae* using 5' SAGE. *Nucleic Acids Res* **33**, 2838-2851 (2005).
2. Arribere, J.A. & Gilbert, W.V. Roles for transcript leaders in translation and mRNA decay revealed by transcript leader sequencing. *Genome Res* **23**, 977-987 (2013).
3. Pelechano, V., Wei, W., Jakob, P. & Steinmetz, L.M. Genome-wide identification of transcript start and end sites by transcript isoform sequencing. *Nat Protoc* **9**, 1740-1759 (2014).
4. Ni, T. et al. A paired-end sequencing strategy to map the complex landscape of transcription initiation. *Nat Methods* **7**, 521-527 (2010).
5. Agarwal, S., Macfarlan, T.S., Sartor, M.A. & Iwase, S. Sequencing of first-strand cDNA library reveals full-length transcriptomes. *Nat Commun* **6**, 6002 (2015).
6. Nechaev, S. et al. Global analysis of short RNAs reveals widespread promoter-proximal stalling and arrest of Pol II in *Drosophila*. *Science* **327**, 335-338 (2010).
7. Afik, S. et al. Defining the 5 and 3 landscape of the *Drosophila* transcriptome with Exo-seq and RNaseH-seq. *Nucleic Acids Res* (2017).
8. Cumbie, J.S., Ivanchenko, M.G. & Megraw, M. NanoCAGE-XL and CapFilter: an approach to genome wide identification of high confidence transcription start sites. *BMC Genomics* **16**, 597 (2015).
9. Salimullah, M., Sakai, M., Plessy, C. & Carninci, P. NanoCAGE: a high-resolution technique to discover and interrogate cell transcriptomes. *Cold Spring Harb Protoc* **2011**, pdb prot5559 (2011).
10. Murata, M. et al. Detecting expressed genes using CAGE. *Methods Mol Biol* **1164**, 67-85 (2014).
11. Takahashi, H., Kato, S., Murata, M. & Carninci, P. CAGE (cap analysis of gene expression): a protocol for the detection of promoter and transcriptional networks. *Methods Mol Biol* **786**, 181-200 (2012).

## **Supplementary Tables**

### **Supplementary Table 1: Library sequencing metrics**

For each library in this study, basic information about its construction, sequencing, analysis, and performance (QC metrics). All samples are from human sources. All K-562 data are from hard clipped STAR alignments; other data are from soft clipped STAR alignments. Metrics are only for read 1, except for Standard RNA-Seq. Reads aligned for CAGE Main and Standard RNA-Seq libraries are limited to PF reads.

### **Supplementary Table 2: ERCC spike-in RNA 5' end sequence coverage**

For each K-562 library, this table reports the % (reads at position 10) / (all reads) for each spike-in transcript. Lowest for each library (red) and highest for each library (green). Used in pool of 8 (CAGE repeat & RAMPAGE repeat, highlighted in yellow). The CAGE Repeat, RAMPAGE Main, & STRT Main data are only from 1 of 2 lanes of sequencing. CAGE Main-6 was to be used to compare method performance for K-562 RNA, but not for spike-in transcripts because they are uncapped.

### **Supplementary Table 3: Reads aligning to ERCC spike-in RNA**

For each K-562 library, this table reports the number of reads aligning to each ERCC spike-in. Used in pool of 8 (CAGE repeat & RAMPAGE repeat, yellow). Used in pool of 32 (green). CAGE repeat data are only from 1 of 2 lanes of sequencing.

### **Supplementary Table 4: Deviation of percentage of reads aligning to ERCC spike-in RNA between input and output**

For each K-562 library and each ERCC spike-in, this table reports the mean quantitation error, the average of the absolute value of the difference between the input and output percentages.

Used in pool of 8 (CAGE repeat & RAMPAGE repeat, yellow). Used in pool of 32 (green).

CAGE repeat data are only from 1 of 2 lanes of sequencing. Calculations were done with reads aligning to the spike-ins added. Percentages shown are Absolute Value (Output - Input).

#### **Supplementary Table 5: Analysis of eRNAs for Paraclu-called peaks in intergenic regions**

For each method, corroborative data and analyses are shown to assess how many Paraclu-called peaks in intergenic regions could be eRNAs.

#### **Supplementary Table 6: Analysis of eRNAs for paired peaks in intergenic regions**

For each method, corroborative data and analyses are shown to assess how many paired peaks in intergenic regions could be eRNAs.

#### **Supplementary Table 7: List of differentially TSS usage in brain neuron**

For each brain-related sample, TSSs differentially used among the samples are listed. PR (peak reads) – only reads aligning to region defined as peak counted. NA values for p.adj are assigned when no comparison was made because PR is not above the threshold of 100 reads in two samples for that peak. Mean expression and Std. Dev are for the gene. Peak name is a concatenation of gene name, position in gene, and number peaks in gene. Scaled values are the percentage of peak reads in a given peak for that sample. One library was prepared from each sample (n=1).

### **Supplementary Table 8: Comparison of lab methods time, cost, and input**

For each method, details about library construction are presented. Cost assumes eight reactions processed in single batch with a BioAnalyzer High Sensitivity DNA chip used for final QC.

### **Supplementary Table 9: Library sequencing details**

For each library type, details about Illumina sequencing are reported.

### **Supplementary Table 10: External Datasets**

Source for each external dataset is listed.

### **Supplementary Table 11: ERCC spike-in sequences**

Complete sequence of each ERCC spike-in is listed.

### **Supplementary Table 12: Paraclu filtering parameters**

For each sample, Paraclu filtering parameters (**Online Methods**) are listed.

Table S1

| Method           | Replicate    | Read 1 trim | Read 2 trim | RNA Sample                            | RNA source (lot #)                  | Total Reads | Reads Aligned | % Reads Aligned | rRNA Bases | Coding Bases | UTR Bases | Intronic Bases | Intergenic Bases | Correct Strand Reads |
|------------------|--------------|-------------|-------------|---------------------------------------|-------------------------------------|-------------|---------------|-----------------|------------|--------------|-----------|----------------|------------------|----------------------|
| CAGE             | Main-1       | 3 + 6       | 0           | K-562                                 | Ambion (1409009)                    | 8,340,957   | 7,631,449     | 91%             | 9.1%       | 15%          | 55%       | 7%             | 14%              | 99.7%                |
| CAGE             | Main-4       | 3 + 6       | 0           | K-562                                 | Ambion (1409009)                    | 8,088,598   | 7,567,022     | 94%             | 13.5%      | 13%          | 50%       | 8%             | 16%              | 99.6%                |
| CAGE             | Main-6       | 3 + 6       | 0           | K-562                                 | Ambion (1409009)                    | 7,842,538   | 7,391,797     | 94%             | 9.1%       | 14%          | 56%       | 7%             | 14%              | 99.7%                |
| CAGE             | Repeat       | 3 + 6       | n/a         | K-562                                 | Ambion (1210018)                    | 14,563,335  | 12,706,814    | 87%             | 17.0%      | 12%          | 52%       | 7%             | 13%              | 99.6%                |
| Oligo Capping    | Main         | 0           | n/a         | K-562                                 | Ambion (1409009)                    | 114,389,954 | 95,512,056    | 83%             | 0.6%       | 17%          | 63%       | 6%             | 15%              | 99.2%                |
| RAMPAGE          | Main         | 4           | 15          | K-562                                 | Ambion (1409009)                    | 36,370,919  | 35,866,874    | 99%             | 12.7%      | 22%          | 53%       | 3%             | 9%               | 99.7%                |
| RAMPAGE          | Repeat       | 4           | 15          | K-562                                 | Ambion (1210018)                    | 5,275,652   | 5,219,629     | 99%             | 11.7%      | 22%          | 55%       | 3%             | 8%               | 99.7%                |
| STRT             | Main         | 11          | 0           | K-562                                 | Ambion (1409009)                    | 20,500,952  | 18,775,073    | 92%             | 1.8%       | 32%          | 49%       | 7%             | 10%              | 99.5%                |
| STRT             | Repeat       | 11          | 0           | K-562                                 | Ambion (1409009)                    | 7,282,989   | 6,604,049     | 91%             | 1.1%       | 34%          | 46%       | 8%             | 11%              | 99.5%                |
| STRT             | Repeat-10ng  | 11          | 0           | K-562                                 | Ambion (1409009)                    | 58,150,901  | 52,048,326    | 90%             | 2.9%       | 32%          | 48%       | 8%             | 9%               | 99.5%                |
| STRT             | Repeat-100ng | 11          | 0           | K-562                                 | Ambion (1409009)                    | 67,949,256  | 61,071,566    | 90%             | 3.7%       | 31%          | 48%       | 7%             | 9%               | 99.5%                |
| STRT             | RepeatA-1μg  | 11          | 0           | K-562                                 | Ambion (1409009)                    | 55,966,586  | 50,909,724    | 91%             | 2.9%       | 32%          | 48%       | 7%             | 9%               | 99.5%                |
| STRT             | RepeatB-1μg  | 11          | 0           | K-562                                 | Ambion (1409009)                    | 56,280,694  | 51,143,105    | 91%             | 2.7%       | 32%          | 48%       | 7%             | 9%               | 99.4%                |
| STRT             | RepeatA-5μg  | 11          | 0           | K-562                                 | Ambion (1409009)                    | 52,227,631  | 47,471,979    | 91%             | 2.4%       | 33%          | 47%       | 8%             | 9%               | 99.4%                |
| STRT             | RepeatB-5μg  | 11          | 0           | K-562                                 | Ambion (1409009)                    | 58,957,331  | 52,929,187    | 90%             | 2.5%       | 32%          | 47%       | 8%             | 10%              | 99.4%                |
| STRT             | RepeatA-10μg | 11          | 0           | K-562                                 | Ambion (1409009)                    | 55,749,637  | 50,211,000    | 90%             | 1.2%       | 36%          | 44%       | 8%             | 11%              | 99.6%                |
| STRT             | RepeatB-10μg | 11          | 0           | K-562                                 | Ambion (1409009)                    | 60,248,148  | 54,231,450    | 90%             | 1.1%       | 36%          | 43%       | 8%             | 11%              | 99.5%                |
| NanoCAGE-XL      | Main         | 6 + 12      | 0           | K-562                                 | Ambion (1409009)                    | 6,957,156   | 6,407,741     | 92%             | 0.1%       | 34%          | 23%       | 27%            | 17%              | 99.6%                |
| Standard RNA-Seq | Main         | 0           | 0           | K-562                                 | Ambion (not recorded)               | 59,695,850  | 54,819,796    | 92%             | 0.1%       | 28%          | 16%       | 33%            | 23%              | 99.3%                |
| GRO-cap          | Main         | 0           | 0           | K-562                                 | Core et al. <i>Nat Genet</i> (2014) | 45,538,197  | 35,809,451    | 79%             | 1.3%       | 5%           | 26%       | 20%            | 47%              | 90.3%                |
|                  |              |             |             |                                       |                                     |             |               |                 |            |              |           |                |                  |                      |
| CAGE             | Main         | 3 + 6       | 0           | Brain vascular smooth muscle cells    | Sciencell                           | 23,538,559  | 21,104,822    | 90%             | 13.1%      | 15%          | 60%       | 6%             | 8%               | 99.8%                |
| CAGE             | Main         | 3 + 6       | 0           | Brain microvascular endothelial cells | Sciencell                           | 31,173,330  | 29,588,075    | 95%             | 7.8%       | 15%          | 62%       | 5%             | 11%              | 99.8%                |
| CAGE             | Main         | 3 + 6       | 0           | Neuron                                | Sciencell                           | 15,837,644  | 14,862,756    | 94%             | 7.0%       | 13%          | 62%       | 7%             | 12%              | 99.6%                |
| CAGE             | Main         | 3 + 6       | 0           | Astrocyte                             | Sciencell                           | 17,716,230  | 16,602,202    | 94%             | 10.5%      | 14%          | 56%       | 7%             | 13%              | 99.7%                |
| CAGE             | Main         | 3 + 6       | 0           | Fetal frontal lobe                    | Biochain                            | 22,920,356  | 21,599,869    | 94%             | 5.5%       | 12%          | 61%       | 9%             | 13%              | 99.5%                |
| CAGE             | Main         | 3 + 6       | 0           | Adult frontal lobe                    | Biochain                            | 25,659,539  | 24,268,652    | 95%             | 16.8%      | 12%          | 48%       | 10%            | 15%              | 99.4%                |
| CAGE             | Main         | 3 + 6       | 0           | Organoids                             | this paper                          | 14,728,291  | 13,366,256    | 91%             | 10.6%      | 10%          | 39%       | 24%            | 18%              | 98.6%                |
| CAGE             | Main         | 3 + 6       | 0           | <i>In vitro</i> excitatory neurons    | this paper                          | 26,257,718  | 24,499,412    | 93%             | 11.1%      | 12%          | 56%       | 11%            | 11%              | 99.4%                |



Table S2

| Lab Method     | CAGE         | CAGE         | CAGE         | CAGE         | Oligo Capping | RAMPAGE      | RAMPAGE      | STRT         | NanoCAGE XL |
|----------------|--------------|--------------|--------------|--------------|---------------|--------------|--------------|--------------|--------------|--------------|--------------|--------------|--------------|--------------|--------------|--------------|--------------|--------------|-------------|
| Replicate      | Main-1       | Main-4       | Main-6       | Repeat       | Main          | Main         | Repeat       | Main         | Repeat       | Repeat-10ng  | Repeat-100ng | RepeatA-1µg  | RepeatB-1µg  | RepeatA-5µg  | RepeatB-5µg  | RepeatA-10µg | RepeatB-10µg | Main         |             |
| Capped?        | Yes          | Yes          | No           | Yes          | Yes           | Yes          | Yes          | No           | Yes         |
| ERCC-00002     | 98.6%        | 99.0%        | 47.1%        |              | 91.7%         | 98.6%        |              | 96.9%        | 96.9%        | 96.8%        | 96.8%        | 96.2%        | 96.2%        | 96.7%        | 96.5%        | 94.3%        | 93.7%        | 39.3%        |             |
| ERCC-00003     | 99.1%        | 98.0%        | 61.0%        |              | 88.6%         | 99.2%        |              | 98.8%        | 97.8%        | 98.1%        | 98.6%        | 98.4%        | 98.6%        | 98.6%        | 98.5%        | 98.1%        | 98.0%        | 55.5%        |             |
| ERCC-00012     | 98.8%        | 99.2%        | 61.9%        |              | 97.0%         | 98.7%        |              | 96.9%        | 97.3%        | 95.0%        | 95.9%        | 95.7%        | 95.7%        | 96.1%        | 95.9%        | 94.6%        | 95.0%        | 84.8%        |             |
| ERCC-00017     | 96.1%        | 96.8%        | 71.8%        |              | 81.4%         | 97.7%        |              | 98.2%        | 98.2%        | 96.4%        | 97.0%        | 96.9%        | 96.7%        | 97.3%        | 97.0%        | 96.9%        | 96.8%        | 60.3%        |             |
| ERCC-00028     | 97.6%        | 98.6%        | 62.5%        |              | 74.0%         | 98.8%        |              | 97.4%        | 97.9%        | 97.3%        | 97.5%        | 97.7%        | 97.7%        | 97.9%        | 97.8%        | 97.7%        | 97.6%        | 37.8%        |             |
| ERCC-00031     | 96.4%        | 97.4%        | 32.1%        |              | 64.5%         | 98.8%        |              | 97.4%        | 97.2%        | 95.7%        | 95.6%        | 96.2%        | 96.1%        | 96.4%        | 96.6%        | 95.9%        | 96.2%        | 55.1%        |             |
| ERCC-00034     | 98.2%        | 98.4%        | 82.6%        |              | 77.0%         | 98.9%        |              | 94.4%        | 91.4%        | 94.6%        | 94.3%        | 93.1%        | 93.9%        | 93.4%        | 93.4%        | 88.9%        | 88.0%        | 34.7%        |             |
| ERCC-00035     | 97.7%        | 98.3%        | 71.7%        |              | 55.2%         | 99.1%        |              | 97.3%        | 96.7%        | 93.7%        | 95.0%        | 94.8%        | 94.7%        | 94.7%        | 95.2%        | 93.8%        | 94.3%        | 71.3%        |             |
| ERCC-00041     | 97.4%        | 97.9%        | 64.4%        | 98.1%        | 77.5%         | 99.1%        | 97.9%        | 97.2%        | 96.9%        | 96.0%        | 96.7%        | 96.3%        | 96.5%        | 96.8%        | 96.6%        | 95.0%        | 94.7%        | 81.5%        |             |
| ERCC-00042     | 93.5%        | 83.8%        | 62.7%        | 84.7%        | 36.0%         | 98.7%        | 98.2%        | 93.1%        | 89.1%        | 90.3%        | 90.3%        | 88.6%        | 88.3%        | 90.0%        | 88.7%        | 82.1%        | 79.2%        | 34.3%        |             |
| ERCC-00043     | 96.7%        | 96.8%        | 28.1%        | 97.6%        | 52.8%         | 87.0%        | 79.7%        | 95.8%        | 96.4%        | 95.0%        | 96.1%        | 94.8%        | 95.2%        | 95.0%        | 95.0%        | 93.2%        | 93.9%        | 19.1%        |             |
| ERCC-00044     | 98.0%        | 98.6%        | 66.7%        | 98.9%        | 87.4%         | 98.8%        | 99.5%        | 98.7%        | 98.8%        | 98.0%        | 97.7%        | 98.0%        | 97.4%        | 97.9%        | 97.7%        | 97.0%        | 96.7%        | 65.9%        |             |
| ERCC-00048     | 97.7%        | 98.1%        | 63.4%        | 98.8%        | 59.0%         | 99.2%        | 99.7%        | 98.0%        | 96.4%        | 97.2%        | 96.8%        | 96.1%        | 96.5%        | 95.9%        | 96.8%        | 93.7%        | 93.5%        | 34.5%        |             |
| ERCC-00053     | 97.8%        | 98.0%        | 68.0%        | 98.6%        | 57.9%         | 100.0%       | 99.7%        | 97.0%        | 95.4%        | 96.8%        | 96.0%        | 95.8%        | 95.6%        | 95.3%        | 95.5%        | 94.6%        | 94.8%        | 52.7%        |             |
| ERCC-00057     | 98.7%        | 99.1%        | 80.0%        | 98.8%        | 95.2%         | 98.0%        | 98.6%        | 97.0%        | 96.8%        | 95.7%        | 96.6%        | 96.4%        | 96.4%        | 95.9%        | 96.5%        | 96.1%        | 95.0%        | 38.5%        |             |
| ERCC-00058     | 98.6%        | 99.0%        | 74.4%        | 98.9%        | 92.4%         | 97.2%        | 96.3%        | 95.2%        | 93.7%        | 90.1%        | 91.4%        | 91.6%        | 91.1%        | 91.7%        | 91.7%        | 90.7%        | 90.4%        | 67.5%        |             |
| ERCC-00061     | 95.4%        | 96.4%        | 45.2%        |              | 88.6%         | 98.8%        |              | 94.3%        | 96.7%        | 93.2%        | 93.6%        | 93.9%        | 94.1%        | 93.8%        | 93.7%        | 91.2%        | 91.5%        | 55.9%        |             |
| ERCC-00062     | 98.4%        | 98.3%        | 50.0%        |              | 73.3%         | 99.5%        |              | 93.8%        | 89.5%        | 93.2%        | 91.8%        | 90.6%        | 91.4%        | 90.7%        | 91.8%        | 85.8%        | 87.4%        | 63.0%        |             |
| ERCC-00069     | 96.9%        | 97.3%        | 45.1%        |              | 73.1%         | 98.0%        |              | 95.5%        | 94.9%        | 95.2%        | 94.7%        | 95.0%        | 95.0%        | 95.2%        | 95.5%        | 94.2%        | 94.1%        | 60.2%        |             |
| ERCC-00078     | 96.9%        | 98.2%        | 50.0%        |              | 78.3%         | 97.8%        |              | 97.2%        | 97.1%        | 96.3%        | 96.1%        | 96.2%        | 96.5%        | 96.6%        | 96.9%        | 95.3%        | 94.7%        | 51.8%        |             |
| ERCC-00085     | 98.9%        | 99.2%        | 73.3%        |              | 73.6%         | 98.8%        |              | 97.9%        | 95.7%        | 96.7%        | 96.2%        | 96.3%        | 96.7%        | 96.3%        | 96.1%        | 93.9%        | 93.7%        | 38.9%        |             |
| ERCC-00096     | 98.9%        | 99.1%        | 50.0%        |              | 92.9%         | 98.4%        |              | 96.9%        | 96.2%        | 94.7%        | 95.1%        | 95.0%        | 94.4%        | 94.5%        | 95.7%        | 93.7%        | 93.7%        | 63.5%        |             |
| ERCC-00098     | 97.7%        | 97.7%        | 91.5%        |              | 87.5%         | 98.8%        |              | 98.0%        | 97.9%        | 96.2%        | 96.7%        | 96.8%        | 97.2%        | 97.1%        | 97.3%        | 97.2%        | 97.3%        | 66.5%        |             |
| ERCC-00108     | 98.4%        | 98.9%        | 46.7%        |              | 83.0%         | 97.7%        |              | 94.9%        | 94.7%        | 94.2%        | 95.2%        | 94.1%        | 94.3%        | 94.9%        | 94.8%        | 92.8%        | 92.4%        | 19.3%        |             |
| ERCC-00111     | 98.4%        | 98.1%        | 35.9%        |              | 70.0%         | 93.4%        |              | 92.9%        | 87.6%        | 92.5%        | 93.5%        | 92.3%        | 91.7%        | 91.7%        | 91.7%        | 83.1%        | 81.7%        | 14.5%        |             |
| ERCC-00112     | 96.2%        | 97.5%        | 44.4%        |              | 91.2%         | 97.1%        |              | 97.1%        | 94.9%        | 94.7%        | 94.9%        | 95.4%        | 95.5%        | 95.4%        | 95.7%        | 93.4%        | 93.7%        | 67.1%        |             |
| ERCC-00117     | 98.3%        | 98.4%        | 55.6%        |              | 97.7%         | 98.5%        |              | 98.8%        | 98.4%        | 97.4%        | 98.0%        | 97.9%        | 98.0%        | 98.2%        | 98.1%        | 97.7%        | 97.7%        | 59.6%        |             |
| ERCC-00126     | 98.6%        | 99.0%        | 73.7%        |              | 15.1%         | 95.6%        |              | 96.7%        | 94.4%        | 91.3%        | 91.9%        | 91.5%        | 91.2%        | 92.4%        | 92.5%        | 87.2%        | 87.8%        | 53.1%        |             |
| ERCC-00130     | 98.1%        | 99.0%        | 64.6%        |              | 91.2%         | 99.2%        |              | 96.9%        | 96.4%        | 96.0%        | 95.9%        | 96.1%        | 96.0%        | 95.7%        | 96.4%        | 95.2%        | 95.4%        | 65.2%        |             |
| ERCC-00136     | 98.6%        | 98.4%        | 68.4%        |              | 63.3%         | 98.5%        |              | 98.0%        | 97.6%        | 98.0%        | 97.8%        | 97.8%        | 98.1%        | 97.8%        | 98.1%        | 97.1%        | 97.1%        | 16.7%        |             |
| ERCC-00145     | 97.5%        | 97.0%        | 43.2%        |              | 68.9%         | 98.4%        |              | 95.8%        | 95.2%        | 94.4%        | 94.6%        | 94.1%        | 94.5%        | 95.0%        | 94.6%        | 92.1%        | 92.5%        | 47.9%        |             |
| ERCC-00157     | 97.5%        | 98.6%        | 77.3%        |              | 90.8%         | 97.2%        |              | 97.3%        | 94.6%        | 96.5%        | 96.0%        | 96.3%        | 95.8%        | 96.2%        | 96.5%        | 94.4%        | 92.9%        | 55.4%        |             |
| <b>Average</b> | <b>97.7%</b> | <b>97.8%</b> | <b>59.8%</b> | <b>96.8%</b> | <b>75.8%</b>  | <b>97.9%</b> | <b>96.2%</b> | <b>96.6%</b> | <b>95.6%</b> | <b>95.2%</b> | <b>95.5%</b> | <b>95.2%</b> | <b>95.2%</b> | <b>95.4%</b> | <b>95.5%</b> | <b>93.3%</b> | <b>93.2%</b> | <b>51.0%</b> |             |
| <b>Median</b>  | <b>97.9%</b> | <b>98.3%</b> | <b>62.6%</b> | <b>98.7%</b> | <b>77.9%</b>  | <b>98.6%</b> | <b>98.4%</b> | <b>97.0%</b> | <b>96.4%</b> | <b>95.7%</b> | <b>96.0%</b> | <b>95.9%</b> | <b>95.8%</b> | <b>95.8%</b> | <b>96.0%</b> | <b>94.3%</b> | <b>94.0%</b> | <b>55.2%</b> |             |



Table S4

| Lab Method |                | CAGE        | CAGE        | CAGE        | CAGE        | Oligo Capping | Rampage     | Rampage     | STRT        | STRT        | STRT        | STRT         | STRT        | STRT        | STRT        | STRT        | STRT         | STRT         | NanoCAGE-XL |     |
|------------|----------------|-------------|-------------|-------------|-------------|---------------|-------------|-------------|-------------|-------------|-------------|--------------|-------------|-------------|-------------|-------------|--------------|--------------|-------------|-----|
| Replicate  |                | Main-1      | Main-4      | Main-6      | Repeat      | Main          | Main        | Repeat      | Main        | Repeat      | Repeat-10ng | Repeat-100ng | RepeatA-1µg | RepeatB-1µg | RepeatA-5µg | RepeatB-5µg | RepeatA-10µg | RepeatB-10µg | Main        |     |
| Capped?    | In 32?         | Yes         | Yes         | No          | Yes         | Yes           | Yes         | Yes         | No          | No          | No          | No           | No          | No          | No          | No          | No           | No           | No          | Yes |
| ERCC-00002 | Y              | 1.3%        | 1.2%        | 1.6%        |             | 0.5%          | 2.0%        |             | 0.7%        | 0.7%        | 0.1%        | 0.2%         | 0.3%        | 0.4%        | 0.3%        | 0.1%        | 0.7%         | 0.8%         | 3.4%        |     |
| ERCC-00003 | Y              | 1.4%        | 1.4%        | 5.0%        |             | 1.9%          | 1.3%        |             | 2.4%        | 2.2%        | 1.8%        | 2.0%         | 1.8%        | 1.9%        | 1.9%        | 1.9%        | 1.7%         | 1.6%         | 2.9%        |     |
| ERCC-00012 | Y              | 2.8%        | 2.5%        | 0.0%        |             | 3.0%          | 2.4%        |             | 1.7%        | 1.9%        | 1.6%        | 1.7%         | 1.7%        | 1.8%        | 1.7%        | 1.8%        | 1.7%         | 1.6%         | 1.9%        |     |
| ERCC-00017 | Y              | 0.7%        | 0.9%        | 0.7%        |             | 1.3%          | 1.6%        |             | 3.9%        | 4.7%        | 3.2%        | 3.1%         | 3.5%        | 3.5%        | 3.6%        | 3.6%        | 4.8%         | 5.0%         | 0.4%        |     |
| ERCC-00028 | Y              | 1.4%        | 1.2%        | 0.6%        |             | 0.4%          | 0.1%        |             | 3.2%        | 4.3%        | 2.9%        | 2.9%         | 3.5%        | 3.4%        | 3.5%        | 3.4%        | 4.4%         | 4.5%         | 0.8%        |     |
| ERCC-00031 | Y              | 1.1%        | 0.9%        | 4.5%        |             | 3.6%          | 1.0%        |             | 2.2%        | 2.3%        | 1.8%        | 1.8%         | 2.0%        | 1.9%        | 2.1%        | 2.0%        | 2.6%         | 2.9%         | 1.4%        |     |
| ERCC-00034 | Y              | 0.9%        | 0.9%        | 0.2%        |             | 3.2%          | 0.4%        |             | 0.4%        | 0.8%        | 0.2%        | 0.1%         | 0.3%        | 0.3%        | 0.4%        | 0.3%        | 0.8%         | 0.8%         | 3.6%        |     |
| ERCC-00035 | Y              | 1.5%        | 1.7%        | 1.3%        |             | 1.9%          | 2.3%        |             | 0.3%        | 0.4%        | 0.1%        | 0.1%         | 0.3%        | 0.2%        | 0.1%        | 0.1%        | 0.3%         | 0.4%         | 0.2%        |     |
| ERCC-00041 | Y              | 1.3%        | 1.3%        | 2.1%        | 1.0%        | 2.3%          | 0.1%        | 2.3%        | 1.9%        | 1.7%        | 1.7%        | 1.9%         | 2.0%        | 2.0%        | 1.9%        | 2.0%        | 1.8%         | 1.5%         | 1.3%        |     |
| ERCC-00042 | Y              | 0.7%        | 0.7%        | 2.0%        | 0.9%        | 1.9%          | 2.0%        | 6.6%        | 1.0%        | 1.2%        | 1.0%        | 1.0%         | 1.2%        | 1.1%        | 1.1%        | 1.1%        | 1.4%         | 1.4%         | 2.0%        |     |
| ERCC-00043 | Y              | 2.0%        | 2.1%        | 0.1%        | 0.5%        | 2.4%          | 2.7%        | 7.3%        | 0.6%        | 0.2%        | 0.5%        | 0.4%         | 0.6%        | 0.5%        | 0.4%        | 0.4%        | 0.3%         | 0.3%         | 9.9%        |     |
| ERCC-00044 | Y              | 1.2%        | 1.4%        | 1.3%        | 1.5%        | 3.4%          | 1.1%        | 0.3%        | 0.4%        | 0.4%        | 0.3%        | 0.4%         | 0.2%        | 0.2%        | 0.3%        | 0.2%        | 0.3%         | 0.4%         | 2.9%        |     |
| ERCC-00048 | Y              | 1.8%        | 1.6%        | 0.4%        | 2.6%        | 3.7%          | 1.9%        | 2.7%        | 0.5%        | 1.2%        | 0.5%        | 0.5%         | 0.7%        | 0.7%        | 0.8%        | 0.7%        | 1.3%         | 1.4%         | 2.7%        |     |
| ERCC-00053 | Y              | 0.6%        | 0.7%        | 1.9%        | 5.8%        | 2.3%          | 0.7%        | 24.4%       | 0.6%        | 0.4%        | 0.8%        | 0.7%         | 0.8%        | 0.7%        | 0.7%        | 0.8%        | 0.6%         | 0.6%         | 0.4%        |     |
| ERCC-00057 | Y              | 3.0%        | 3.1%        | 1.1%        | 7.3%        | 0.4%          | 3.8%        | 7.4%        | 0.0%        | 0.0%        | 0.6%        | 0.8%         | 0.6%        | 0.6%        | 0.5%        | 0.5%        | 0.4%         | 0.4%         | 4.3%        |     |
| ERCC-00058 | Y              | 0.5%        | 0.3%        | 0.2%        | 0.8%        | 2.9%          | 2.4%        | 8.4%        | 0.4%        | 0.3%        | 0.1%        | 0.0%         | 0.2%        | 0.1%        | 0.2%        | 0.1%        | 0.5%         | 0.6%         | 0.4%        |     |
| ERCC-00061 | Y              | 1.1%        | 1.1%        | 0.4%        |             | 2.3%          | 0.4%        |             | 0.9%        | 1.1%        | 0.7%        | 0.5%         | 0.7%        | 0.7%        | 0.7%        | 0.8%        | 1.0%         | 1.0%         | 0.7%        |     |
| ERCC-00062 | Y              | 1.2%        | 0.9%        | 0.9%        |             | 1.2%          | 8.7%        |             | 2.3%        | 2.4%        | 2.4%        | 2.4%         | 2.4%        | 2.4%        | 2.4%        | 2.4%        | 2.5%         | 2.4%         | 6.1%        |     |
| ERCC-00069 | Y              | 0.9%        | 1.0%        | 1.6%        |             | 1.1%          | 1.5%        |             | 0.1%        | 0.4%        | 1.4%        | 0.4%         | 0.4%        | 0.4%        | 0.4%        | 0.4%        | 0.5%         | 0.4%         | 0.7%        |     |
| ERCC-00078 | Y              | 0.0%        | 0.0%        | 4.6%        |             | 0.2%          | 0.8%        |             | 4.2%        | 4.1%        | 4.2%        | 4.1%         | 4.1%        | 4.2%        | 4.1%        | 4.1%        | 4.1%         | 4.2%         | 2.7%        |     |
| ERCC-00085 | Y              | 0.1%        | 0.2%        | 1.1%        |             | 0.3%          | 0.6%        |             | 0.1%        | 0.4%        | 0.4%        | 0.3%         | 0.0%        | 0.1%        | 0.0%        | 0.0%        | 0.6%         | 0.6%         | 2.3%        |     |
| ERCC-00096 | Y              | 0.1%        | 0.2%        | 1.0%        |             | 2.5%          | 0.2%        |             | 0.5%        | 0.4%        | 0.6%        | 0.6%         | 0.6%        | 0.5%        | 0.6%        | 0.7%        | 0.4%         | 0.5%         | 0.1%        |     |
| ERCC-00098 | Y              | 0.2%        | 0.4%        | 0.6%        |             | 0.9%          | 3.0%        |             | 2.3%        | 3.5%        | 1.3%        | 1.4%         | 2.1%        | 2.0%        | 2.2%        | 2.0%        | 4.0%         | 3.9%         | 3.0%        |     |
| ERCC-00108 | Y              | 1.1%        | 1.1%        | 2.3%        |             | 1.0%          | 1.9%        |             | 1.6%        | 2.0%        | 1.3%        | 1.2%         | 1.6%        | 1.5%        | 1.5%        | 1.5%        | 1.9%         | 1.9%         | 2.0%        |     |
| ERCC-00111 | Y              | 0.0%        | 0.0%        | 1.5%        |             | 1.7%          | 1.4%        |             | 2.8%        | 3.3%        | 2.4%        | 2.3%         | 2.6%        | 2.6%        | 2.8%        | 2.7%        | 3.4%         | 3.4%         | 1.4%        |     |
| ERCC-00112 | Y              | 0.6%        | 0.4%        | 2.8%        |             | 0.6%          | 1.0%        |             | 1.2%        | 1.6%        | 2.0%        | 2.0%         | 2.1%        | 2.0%        | 2.1%        | 2.0%        | 2.4%         | 2.3%         | 0.5%        |     |
| ERCC-00117 | Y              | 1.6%        | 1.8%        | 0.6%        |             | 24.5%         | 3.1%        |             | 1.6%        | 1.7%        | 1.2%        | 1.4%         | 1.7%        | 1.9%        | 1.7%        | 1.5%        | 2.4%         | 2.2%         | 0.4%        |     |
| ERCC-00126 | Y              | 0.5%        | 0.8%        | 3.7%        |             | 2.2%          | 2.3%        |             | 2.3%        | 3.1%        | 2.5%        | 2.3%         | 2.5%        | 2.6%        | 2.5%        | 2.6%        | 3.6%         | 3.7%         | 1.7%        |     |
| ERCC-00130 | Y              | 4.4%        | 4.2%        | 5.1%        |             | 3.1%          | 7.4%        |             | 0.9%        | 1.2%        | 0.8%        | 0.5%         | 0.9%        | 0.8%        | 1.0%        | 0.9%        | 1.4%         | 1.6%         | 0.4%        |     |
| ERCC-00136 | Y              | 1.0%        | 1.2%        | 2.7%        |             | 1.7%          | 2.5%        |             | 0.5%        | 0.2%        | 1.1%        | 0.8%         | 0.8%        | 0.7%        | 0.8%        | 0.9%        | 0.6%         | 0.7%         | 1.1%        |     |
| ERCC-00145 | Y              | 0.6%        | 0.8%        | 0.6%        |             | 0.2%          | 0.2%        |             | 1.6%        | 1.8%        | 1.7%        | 1.7%         | 1.9%        | 1.8%        | 1.8%        | 1.8%        | 2.0%         | 2.0%         | 0.8%        |     |
| ERCC-00157 | Y              | 1.1%        | 1.1%        | 1.6%        |             | 0.7%          | 2.1%        |             | 0.6%        | 0.9%        | 0.1%        | 0.0%         | 0.2%        | 0.1%        | 0.3%        | 0.3%        | 0.8%         | 0.8%         | 1.9%        |     |
|            | <b>Average</b> | <b>1.1%</b> | <b>1.1%</b> | <b>1.7%</b> | <b>2.6%</b> | <b>2.5%</b>   | <b>2.0%</b> | <b>7.4%</b> | <b>1.4%</b> | <b>1.6%</b> | <b>1.3%</b> | <b>1.2%</b>  | <b>1.4%</b> | <b>1.4%</b> | <b>1.4%</b> | <b>1.4%</b> | <b>1.7%</b>  | <b>1.7%</b>  | <b>2.0%</b> |     |
|            | <b>Median</b>  | <b>1.1%</b> | <b>1.0%</b> | <b>1.3%</b> | <b>1.3%</b> | <b>1.9%</b>   | <b>1.7%</b> | <b>7.0%</b> | <b>1.0%</b> | <b>1.2%</b> | <b>1.1%</b> | <b>0.9%</b>  | <b>1.0%</b> | <b>1.0%</b> | <b>1.0%</b> | <b>1.0%</b> | <b>1.4%</b>  | <b>1.5%</b>  | <b>1.6%</b> |     |

Table S5

| Method        | Total Intergenic Peaks | Overlap DNase-Seq | Percent of total | Overlap H3K27ac | Percent of total | Overlap both | Percent of total | Overlap eRNA DENdb | Percent of total | Overlap eRNA ENCODE | Percent of total |
|---------------|------------------------|-------------------|------------------|-----------------|------------------|--------------|------------------|--------------------|------------------|---------------------|------------------|
| GRO-cap       | 5,890                  | 4,898             | 83%              | 5,584           | 95%              | 4,676        | 79%              | 5,619              | 95%              | 5,378               | 91%              |
| RAMPAGE       | 654                    | 468               | 72%              | 577             | 88%              | 439          | 67%              | 602                | 92%              | 508                 | 78%              |
| CAGE          | 633                    | 503               | 79%              | 586             | 93%              | 478          | 76%              | 595                | 94%              | 527                 | 83%              |
| Oligo capping | 503                    | 245               | 49%              | 329             | 65%              | 236          | 47%              | 355                | 71%              | 280                 | 56%              |
| STRT          | 138                    | 113               | 82%              | 131             | 95%              | 112          | 81%              | 133                | 96%              | 117                 | 85%              |
| NanoCAGE-XL   | 23                     | 18                | 78%              | 21              | 91%              | 16           | 70%              | 23                 | 100%             | 17                  | 74%              |

Table S6

| Method        | Total Peaks | Overlap<br>DNase-<br>Seq | Percent<br>of total | Overlap<br>H3K27ac | Percent<br>of total | Overlap<br>both | Percent<br>of total | Overlap<br>eRNA<br>DENdb | Percent<br>of total | Overlap<br>eRNA<br>ENCODE | Percent<br>of total |
|---------------|-------------|--------------------------|---------------------|--------------------|---------------------|-----------------|---------------------|--------------------------|---------------------|---------------------------|---------------------|
| GRO-cap       | 10,763      | 8,486                    | 79%                 | 8,616              | 80%                 | 6,839           | 64%                 | 10,411                   | 97%                 | 7,317                     | 68%                 |
| CAGE          | 252         | 221                      | 88%                 | 237                | 94%                 | 213             | 85%                 | 242                      | 96%                 | 213                       | 85%                 |
| Oligo capping | 170         | 110                      | 65%                 | 127                | 75%                 | 104             | 61%                 | 136                      | 80%                 | 110                       | 65%                 |
| RAMPAGE       | 161         | 138                      | 86%                 | 152                | 94%                 | 135             | 84%                 | 156                      | 97%                 | 138                       | 86%                 |
| STRT          | 50          | 39                       | 78%                 | 46                 | 92%                 | 38              | 76%                 | 49                       | 98%                 | 38                        | 76%                 |
| NanoCAGE-XL   | 16          | 14                       | 88%                 | 16                 | 100%                | 13              | 81%                 | 16                       | 100%                | 12                        | 75%                 |

Table S8

| <b>Method</b> | <b># of Steps</b> | <b>Time (hours)</b> | <b>Cost per library (\$)</b> | <b>Input (<math>\mu\text{g}</math>)</b> |
|---------------|-------------------|---------------------|------------------------------|-----------------------------------------|
| CAGE          | 14                | 62                  | 81                           | 5                                       |
| RAMPAGE       | 8                 | 29                  | 104                          | 5                                       |
| STRT          | 4                 | 9                   | 27                           | 0.01                                    |
| Oligo Capping | 7                 | 41                  | 315                          | 40                                      |
| NanoCAGE-XL   | 6                 | 11                  | 177                          | 7.5                                     |

Table S9

| Lab method                     | Sequencer | Read length (bases) | Paired end? | Custom sequencing primer (5' to 3')  | Index Read | PhiX added (%) |
|--------------------------------|-----------|---------------------|-------------|--------------------------------------|------------|----------------|
| CAGE                           | HiSeq2500 | 50                  | yes, no     | no                                   | In-line    | 1%, 0.5%       |
| RAMPAGE                        | MiSeq     | 75                  | yes         | TACTACTAGTCGAACTGAAGGTCTCCAGCAGGG    | Separate   | 1%             |
| STRT (10ng)                    | MiSeq     | 75                  | yes         | no                                   | Separate   | 1%             |
| STRT (8 samples, higher input) | NextSeq   | 75                  | yes         | no                                   | Separate   | 1%             |
| Oligo Capping                  | HiSeq2500 | 50                  | yes         | no                                   | None       | 1%             |
| NanoCAGE XL                    | MiSeq     | 75                  | yes         | GAGATCTACTACTAGTCGAACTGAAGGTCTCCAGCA | In-line    | 30%            |
| Standard RNA-Seq               | HiSeq2500 | 101                 | yes         | no                                   | Separate   | not known      |

Table S10

| Method        | Sample/Tissue        | URL                                                                                                                                                                                                                                                                                                                                                                                                                                                                                                                                                                                                                                                                                                                                                                                                                                                                                                                                                                                       |
|---------------|----------------------|-------------------------------------------------------------------------------------------------------------------------------------------------------------------------------------------------------------------------------------------------------------------------------------------------------------------------------------------------------------------------------------------------------------------------------------------------------------------------------------------------------------------------------------------------------------------------------------------------------------------------------------------------------------------------------------------------------------------------------------------------------------------------------------------------------------------------------------------------------------------------------------------------------------------------------------------------------------------------------------------|
| GRO-cap       | K-562                | <a href="https://trace.ncbi.nlm.nih.gov/Traces/sra/?run=SRR1552480">https://trace.ncbi.nlm.nih.gov/Traces/sra/?run=SRR1552480</a>                                                                                                                                                                                                                                                                                                                                                                                                                                                                                                                                                                                                                                                                                                                                                                                                                                                         |
| CAGE (Rep. A) | K-562                | <a href="https://trace.ncbi.nlm.nih.gov/Traces/sra/?run=SRR390536">https://trace.ncbi.nlm.nih.gov/Traces/sra/?run=SRR390536</a>                                                                                                                                                                                                                                                                                                                                                                                                                                                                                                                                                                                                                                                                                                                                                                                                                                                           |
| CAGE (Rep. B) | K-562                | <a href="https://trace.ncbi.nlm.nih.gov/Traces/sra/?run=SRR390537">https://trace.ncbi.nlm.nih.gov/Traces/sra/?run=SRR390537</a>                                                                                                                                                                                                                                                                                                                                                                                                                                                                                                                                                                                                                                                                                                                                                                                                                                                           |
| RAMPAGE       | K-562                | <a href="https://trace.ncbi.nlm.nih.gov/Traces/sra/?run=SRR424591">https://trace.ncbi.nlm.nih.gov/Traces/sra/?run=SRR424591</a>                                                                                                                                                                                                                                                                                                                                                                                                                                                                                                                                                                                                                                                                                                                                                                                                                                                           |
| CAGE          | MCF-7                | <a href="https://www.encodeproject.org/experiments/ENCSR000CJO/">https://www.encodeproject.org/experiments/ENCSR000CJO/</a>                                                                                                                                                                                                                                                                                                                                                                                                                                                                                                                                                                                                                                                                                                                                                                                                                                                               |
| Oligo capping | MCF-7                | <a href="https://trace.ncbi.nlm.nih.gov/Traces/sra/?run=SRR013349">https://trace.ncbi.nlm.nih.gov/Traces/sra/?run=SRR013349</a> , <a href="https://trace.ncbi.nlm.nih.gov/Traces/sra/?run=SRR013351">https://trace.ncbi.nlm.nih.gov/Traces/sra/?run=SRR013351</a>                                                                                                                                                                                                                                                                                                                                                                                                                                                                                                                                                                                                                                                                                                                         |
| CAGE          | mouse hippocampus    | <a href="http://fantom.gsc.riken.jp/5/sstar/FF:13-16E8">http://fantom.gsc.riken.jp/5/sstar/FF:13-16E8</a>                                                                                                                                                                                                                                                                                                                                                                                                                                                                                                                                                                                                                                                                                                                                                                                                                                                                                 |
| STRT          | mouse hippocampus    | <a href="https://www.ncbi.nlm.nih.gov/geo/query/acc.cgi?acc=GSE60361">https://www.ncbi.nlm.nih.gov/geo/query/acc.cgi?acc=GSE60361</a>                                                                                                                                                                                                                                                                                                                                                                                                                                                                                                                                                                                                                                                                                                                                                                                                                                                     |
| CAGE          | Adult Frontal Lobe   | <a href="http://fantom.gsc.riken.jp/5/datafiles/latest/basic/human.tissue.hCAGE/frontal%2520lobe%252c%2520adult%252c%2520pool1.CNhs10647.10040-101F4.hg19.nobarcodes.bam">http://fantom.gsc.riken.jp/5/datafiles/latest/basic/human.tissue.hCAGE/frontal%2520lobe%252c%2520adult%252c%2520pool1.CNhs10647.10040-101F4.hg19.nobarcodes.bam</a>                                                                                                                                                                                                                                                                                                                                                                                                                                                                                                                                                                                                                                             |
| CAGE          | Fetal Temporal Lobe  | <a href="http://fantom.gsc.riken.jp/5/datafiles/latest/basic/human.tissue.hCAGE/temporal%2520lobe%252c%2520fetal%252c%2520donor1%252c%2520tech_rep2.CNhs12996.10063-101H9.hg19.nobarcodes.bam">http://fantom.gsc.riken.jp/5/datafiles/latest/basic/human.tissue.hCAGE/temporal%2520lobe%252c%2520fetal%252c%2520donor1%252c%2520tech_rep2.CNhs12996.10063-101H9.hg19.nobarcodes.bam</a>                                                                                                                                                                                                                                                                                                                                                                                                                                                                                                                                                                                                   |
| CAGE          | Adult Temporal Lobe  | <a href="http://fantom.gsc.riken.jp/5/datafiles/latest/basic/human.tissue.hCAGE/temporal%2520lobe%252c%2520adult%252c%2520pool1.CNhs10637.10031-101E4.hg19.nobarcodes.bam">http://fantom.gsc.riken.jp/5/datafiles/latest/basic/human.tissue.hCAGE/temporal%2520lobe%252c%2520adult%252c%2520pool1.CNhs10637.10031-101E4.hg19.nobarcodes.bam</a>                                                                                                                                                                                                                                                                                                                                                                                                                                                                                                                                                                                                                                           |
| CAGE          | Adult Parietal Lobe  | <a href="http://fantom.gsc.riken.jp/5/datafiles/latest/basic/human.tissue.hCAGE/parietal%2520lobe%252c%2520adult%252c%2520pool1.CNhs10641.10034-101E7.hg19.nobarcodes.bam">http://fantom.gsc.riken.jp/5/datafiles/latest/basic/human.tissue.hCAGE/parietal%2520lobe%252c%2520adult%252c%2520pool1.CNhs10641.10034-101E7.hg19.nobarcodes.bam</a>                                                                                                                                                                                                                                                                                                                                                                                                                                                                                                                                                                                                                                           |
| CAGE          | Fetal Parietal Lobe  | <a href="http://fantom.gsc.riken.jp/5/datafiles/latest/basic/human.tissue.hCAGE/parietal%2520lobe%252c%2520fetal%252c%2520donor1.CNhs11782.10072-101I9.hg19.nobarcodes.bam">http://fantom.gsc.riken.jp/5/datafiles/latest/basic/human.tissue.hCAGE/parietal%2520lobe%252c%2520fetal%252c%2520donor1.CNhs11782.10072-101I9.hg19.nobarcodes.bam</a>                                                                                                                                                                                                                                                                                                                                                                                                                                                                                                                                                                                                                                         |
| CAGE          | Adult Occipital Lobe | <a href="http://fantom.gsc.riken.jp/5/datafiles/latest/basic/human.tissue.hCAGE/occipital%2520lobe%252c%2520adult%252c%2520donor1.CNhs11787.10076-102A4.hg19.nobarcodes.bam">http://fantom.gsc.riken.jp/5/datafiles/latest/basic/human.tissue.hCAGE/occipital%2520lobe%252c%2520adult%252c%2520donor1.CNhs11787.10076-102A4.hg19.nobarcodes.bam</a>                                                                                                                                                                                                                                                                                                                                                                                                                                                                                                                                                                                                                                       |
| CAGE          | Fetal Occipital Lobe | <a href="http://fantom.gsc.riken.jp/5/datafiles/latest/basic/human.tissue.hCAGE/occipital%2520lobe%252c%2520fetal%252c%2520donor1.CNhs11784.10073-102A1.hg19.nobarcodes.bam">http://fantom.gsc.riken.jp/5/datafiles/latest/basic/human.tissue.hCAGE/occipital%2520lobe%252c%2520fetal%252c%2520donor1.CNhs11784.10073-102A1.hg19.nobarcodes.bam</a>                                                                                                                                                                                                                                                                                                                                                                                                                                                                                                                                                                                                                                       |
| CAGE          | iPS                  | <a href="http://fantom.gsc.riken.jp/5/datafiles/latest/basic/human.timecourse.hCAGE/iPS%2520differentiation%2520to%2520neuron%252c%2520control%2520donor%2520C11-CRL2429%252c%2520day18%252c%2520rep2.CNhs13825.13428-144D8.hg19.nobarcodes.bam">http://fantom.gsc.riken.jp/5/datafiles/latest/basic/human.timecourse.hCAGE/iPS%2520differentiation%2520to%2520neuron%252c%2520control%2520donor%2520C11-CRL2429%252c%2520day18%252c%2520rep2.CNhs13825.13428-144D8.hg19.nobarcodes.bam</a> , <a href="http://fantom.gsc.riken.jp/5/datafiles/latest/basic/human.timecourse.hCAGE/iPS%2520differentiation%2520to%2520neuron%252c%2520control%2520donor%2520C11-CRL2429%252c%2520day18%252c%2520rep1.CNhs13916.13424-144D4.hg19.nobarcodes.bam">http://fantom.gsc.riken.jp/5/datafiles/latest/basic/human.timecourse.hCAGE/iPS%2520differentiation%2520to%2520neuron%252c%2520control%2520donor%2520C11-CRL2429%252c%2520day18%252c%2520rep1.CNhs13916.13424-144D4.hg19.nobarcodes.bam</a> |





Table S11

|                   |                                                                                                                                                                                                                                                                                                                                                                                                                                                                                                                                                                                                                                                                                                                                                                                                                                                                                                                                                                                                                                                                                                                                                                                                                                                                                                                                                                                                                                                                                                                                                                                                                                                                                                                                                                                                                                                                                                                                                                                                                                                                                                                                                                                                                     |
|-------------------|---------------------------------------------------------------------------------------------------------------------------------------------------------------------------------------------------------------------------------------------------------------------------------------------------------------------------------------------------------------------------------------------------------------------------------------------------------------------------------------------------------------------------------------------------------------------------------------------------------------------------------------------------------------------------------------------------------------------------------------------------------------------------------------------------------------------------------------------------------------------------------------------------------------------------------------------------------------------------------------------------------------------------------------------------------------------------------------------------------------------------------------------------------------------------------------------------------------------------------------------------------------------------------------------------------------------------------------------------------------------------------------------------------------------------------------------------------------------------------------------------------------------------------------------------------------------------------------------------------------------------------------------------------------------------------------------------------------------------------------------------------------------------------------------------------------------------------------------------------------------------------------------------------------------------------------------------------------------------------------------------------------------------------------------------------------------------------------------------------------------------------------------------------------------------------------------------------------------|
| <p>ERCC-00012</p> | <p>GGGAATTCGAGAGATGTTTGTAGGTGCGGAATGTGTGCGGTCTACCTTAGCTGTAGTGTGCGATGAACCTACACACAACGTG<br/> GTATAGTGGCCGATCTTAGAGTGATCCTATCACTCCTTACGCACCAGAAGGGATCTGCATACCAGGCGGAGAAGCTTGAAGGC<br/> GGCTAGATCACTGAATTGCGGGAATCGGCATTTTCGCATTCTTAGGATCTAAACCTTAGACCTCCGCGTGCATTGCACCTGCT<br/> TGGTACAGAGTTACAAGCCCCCGCACTTTCTTTGCGGTCTTAAAGAGGGAAATCGCCCAATTAGCAGAGTGTGAGGTGTTAC<br/> GCGCGATTGAGCCGTGAGAAGAATCGATAGAGCCGCGTCGGGACCTTGATGGTATCTCTGCCTCAGCTAACCTGCTAGGTCCG<br/> TCCCCTGGGGATGATCAGGACTGCGGATAGTAAATTGCGGGTTTGAAGCCGGACTTGCCGCTAGGCAAAGCACAAAAACATC<br/> GGACATGTAGAAGTCTCATCGAACTCCTTTCCGTTTCATGCAGATACTTCAACTGTGACTAGTGGGGTTCGGGAGCACCCGCA<br/> CTACTTCATTCTTGGCGGTGGGCCACTTTATGTGACTGTACATGGGACTTCTACTCATACCAATGTAAAGTATAGTTAACGCC<br/> CTGTCCACTCTACTCAGGCGTAATCATCGCGGAAGGCTATCCACAGCCATCAGCGGTCTACATGTCCCAGCAGATTACCTG<br/> TCCCTGCGGGTCCGCGTCACAGCCTATTCTGAGGCTCTAAAGACTATGCGAACCCAGGTGTCCCAGTCGATCAGACGACGAAGTC<br/> GGGAAGGAAGCATGGATACAAAAAGGCTTTATATACTGGGTTATCCTAGGGGATGTTTTTACCGGACTGGTCAGCCTCGGTG<br/> CGCTCGGCCTAGGCGTTACTGCATGGGGGCTGTGGGCAATTTGGTATTTCTCAGGACTATGGACAAAAAAAAAAAAAAAAAAAA<br/> AAAAAA</p>                                                                                                                                                                                                                                                                                                                                                                                                                                                                                                                                                                                                                                                                                                                                                                                                                                                                                                                                                                                                                                                                                              |
| <p>ERCC-00013</p> | <p>GGGAATTCACCGAGCTCAGATGTGAAGGATCTTCTTGGAGGATTAATAAATGATTATCTGTAAAACCCACGTGAACCTTGGT<br/> ATCATGCGGGAAGCAGGGCGAATCGTGGCTTAACTCATGAAGAGTTAAAAAGCACATTAACCAGGAATCTCGACAAAAGA<br/> ATTGGATCAAATTGCCGAACGTTTTATTAAGAAGCAGGGTGCAATCCCATCTTTTAGGGGGTATAATGGGTTTCGCGGGAGCA<br/> TTTGCATCAGTTAATGAAGAACTCGTTTACGGCATACTGGCAGCAGGGTGCTGAAGGACGGTGACATCATCAGTATTGAT<br/> ATCGGTGCTAAATTAATGGTTATCATGGTGACTCTGCATGGACATATCCGGTAGGAAACATCAGCGATGATGACAAAAAAT<br/> TCTGGAAGTGACAGAGGAGTCTTTATATAAAGGCTTGCAGGAAGCAAACCAGGTGAACGTTTGTGCAATATTTCCACGCAA<br/> TACAAACGTATGTCGAAAATGAGCAGTTTTTCACTTGTAGGGAGTATGTCGGACATGGTGTGGTCAAGACTTGCATGAGGAC<br/> CCGCAAATTCCTCATTACGGTCCGCCAACAAAGGACCACGGCTTAAACCTGGCATGGTCTCGCTATTGAACCTATGGTGAA<br/> CGCTGGCAGCCGCTACGTGAAAACATTGGCTGATAACTGGACGGTTGTAACGGTAGATGGGAAAAAGTGTGCTCATTGTAAC<br/> ATACGATTGCGATTACGGAAACGGTTTTTTGAATACTGACGAGAGTAAAAAAAAAAAAAAAAAAAAAAAAAAAA</p>                                                                                                                                                                                                                                                                                                                                                                                                                                                                                                                                                                                                                                                                                                                                                                                                                                                                                                                                                                                                                                                                                                                                                                                                                                                                                                                 |
| <p>ERCC-00014</p> | <p>GGGAATTCGAGCTCGGTACCAAAGAAGAAGGAAAGTAGAGGAGATCAAGATGTCAAACGAAACAATTAATTAGTCATTGCG<br/> GGACCGCGTGGAAGAATGGGGCAGGAAGCTGTTAAATTGGCAGAACGAACACCACATTTTGACCTTGTAGGGGCCATAGACCA<br/> TACATACGATCAGCAAAAATATCTGATGTGATGCCTGTTGAGTCAGATGCTTTTCACTTACACAGATATCCTTGCCTGTTTTA<br/> CAGAAACACAACCGGATGTCTTGATTGATTTAACAACGCCCGAAATCGGAAAAGTACATACAAAAATTGCATTAGAGCACGTA<br/> GTCCGTCCAGTTGTGCGGAACAACCGGTTTTCTCAGAAGCTGATTTAAAGAGCTCACATCTTTAACAGAAGAAAAAGGGATCGG<br/> AGCCATCATCGCGCAAATTTTGCCTCGGTGCGATACTGATGATGAAATTTTCAAAAATGGCTGCCAATATTTTGGAGGATG<br/> TTGAGATTATTGAGCTTCATCATGACCAGAAGCTTGACGCACCAAGCGGAACCTGCGCTTAAAACAGCGGAAATGATTTTCAGAA<br/> GTCCGTAAAGAAAAGCAGCAAGGACATCCGGATGAAAAAGAAATTCTCCAGGAGCAAGAGGAGCGGAGCAAACCGGTATTTCG<br/> CTTGACAGCGTCCGTCTTCCGGGACTGATCGCGCATCAGGAGGTGATGTTCCGGCATGGATGGCCAAACGCTTCAGATACGCC<br/> ATGATTTCTATAACCGTGCTTCTTTTTCATGTCAGGCGTTAAACTGTCAGTCGAACAAGTCATGAAGATTGATCAGCTTGTGTAT<br/> GGTTTAGAAAATATCATTGATTAGACGGGGGATAAACAATGAAAATTGCTTTGATCGCGCATGACAAGAAAAAACAGGATAT<br/> GGTTCAATTTACGACTGCCTATCGGGATATTTTAAAGAAATCATGATCTATACGCAACCGGAACCACAGGGTTGAAAATTCATG<br/> AGGCGACAGGTCTTCAAATTGAACGTTTTTCAATCCGGCCCTTTAGGGGGAGACCAGCAAATCGGTGCACTGATCGCTGCCAAT<br/> GCACTCGATCTTGTCAATTTTTTTGCGCGACCCGCTGACCGCGCAGCCGCATGAACCGGATGTCTCGGCATTAATCCGTTTTATG<br/> TGATGTGATTCCATTCCGCTCGCCACAAAATATGGGTACTGCGGAAATTTCTGTGCGCACACTTGTGATGAAGGTGTTTTCGAAT<br/> TCCGTGACCTTCTTCCGGGAGAAAGAGCCGAATGTATAATGCTGACGTTCTTGTCTTTTGGCGCCACAGTGATGATGTCGAGAT<br/> CGGAATGGGCGGCACAATAGCGAAGTTTTGTCAAACAGGAAAAAAAGTAATGATATGCGATTTGACAGAAGCGGAACCTCTCTT<br/> CTAACGGTACGGTCAGTTTTCGTAAAGAAGAAGCAGCTGAAGCAGCCCGCATATTAGGCGCAGATAAAAGAATTCAGCTAACG<br/> CTTCCAGACCGCGGCCTAATAATGAGTGATCAGGCAATTCGGTCAATGTCACTGTGATCAGAAATCTGTCGGCCAAAAGCGGT<br/> TTTTATGCCGTATAAAAAGGATCGCCATCCGGATCACGGCAATGCGGCTGCACTGGTGAAGAAGCGATCTTTTCCGCCGGAA<br/> TCCATAAATATAAAGACGAAAAAGCCTTCCGGCGCATAAAGTCAGCAAGGTTTACTATTATATGATAAATGGTTTTTCATCAG<br/> CCGGATTTTGTATTGATATCTCGGATACAAATAGAGGCAAAGAAACAAAGCCTCAACGCCTACAAAAGCCAGTTTATCCCGTC<br/> AAAGGATTCGGTTTCTACTCCTCTGACGAATGGGTATATTGAAATCGTTGAAGCGAGAGAAAAGCTTTACGGTAAAGAAGCGG<br/> GCGTGGAGTATGCCGAAGGTTTTTTTTTCCAAACGGATGCTGAAGCTTGAAAAAAAAAAAAAAAAAAAAA</p> |

Table S11

|                   |                                                                                                                                                                                                                                                                                                                                                                                                                                                                                                                                                                                                                                                                                                                                                                                                                                                                                                                                                                                                                                                                                                                                                                                                                                                                                                                                                                                |
|-------------------|--------------------------------------------------------------------------------------------------------------------------------------------------------------------------------------------------------------------------------------------------------------------------------------------------------------------------------------------------------------------------------------------------------------------------------------------------------------------------------------------------------------------------------------------------------------------------------------------------------------------------------------------------------------------------------------------------------------------------------------------------------------------------------------------------------------------------------------------------------------------------------------------------------------------------------------------------------------------------------------------------------------------------------------------------------------------------------------------------------------------------------------------------------------------------------------------------------------------------------------------------------------------------------------------------------------------------------------------------------------------------------|
| <p>ERCC-00016</p> | <p>GGGAATTCGAGCTCGTTGTAACGAATGTTAATTTAGGAGGCAAGAGTTTGTGGGCGGGACTTGCAGCTCGTAACGCTCTAAA<br/>         AGGGTTATGCCGCTGAGGCGGGACCATAGTCAGGAAGTTTGTCCGATCCGCTCCAGTTGTCAAGAGTAGAGGATTCGTGTTC<br/>         GCCGATACTGCCGAAAACGTCATACCGAAGCAATTCTGTGTCACCTCTGTATGTCCGTGCCCCACCTTCGAGTATGAGTTTTA<br/>         AAGTTCGTGCAGAGACATAGCTCGCGCACTCCCTGTGTGATGCCGGTCGGCCGACACATGCTTCAATGTGCCTTGAACCTGCA<br/>         TTCGAAAGAATGTCCTTATCTTGATCGGCCATTGTAATGCAACGCTCTCCTTTTCATTGACACGAGTTTCGTAGATGGCTGTTA<br/>         CTCGCGGACGTTAAATAAAACTATCAGCGTCAGCGGATTAGGAGGCTTACGGGGGAACCTACAATTGTTTCGCCGCATGGTCCG<br/>         AAGGCGCCATGTCCCTCAGCGGAGCGACAACAATTACTACTGGAGCTATTGTAAATACGCAGCAACAAGCGTCCAGACATTTG<br/>         CCGCTGACCTCCAGTCGCATGGACGGGGGAGAACAGCTGGAGCAATGCATCATTTCGTGAGGGACATCCAATCACGGAATCAA<br/>         GGAAGAATTACCAATTTTACCTGTAACGAAAACCAATTTATTACTGACGCAGAGTGAATCACATCTATAGCGGTTACGACCCCTC<br/>         CAGAGTGATCCGACGGCGATGTGTCTTTGACCCCGTGTGACTGGTGTTCCTGTGCTATCCGCAACATGTTTACTCATCACTA<br/>         CGTTAAAAAAAAAAAAAAAAAAAAAAAAA</p>                                                                                                                                                                                                                                                                                                                                |
| <p>ERCC-00017</p> | <p>GGGAATTCGAGAACTGAAAGTGAGTCCCAACGAGAGAGGTGCATCTGTCCAGTGAGAGCTGACTGTCTGCGACAACACTAGTC<br/>         GGTCCAGGCATGGATTTTCGCGACCTCACAACTTAAGGAGGCGGTAATCAGATGACAGCGCGACCCGTGAATGGGTGACCTGC<br/>         TAGTGGAGGTGGCGCGGTGTCCCAGATACAAGGATCTCGATGTAGTACCCTCACATAACTTTGTCCCTGAAATAACATTCGA<br/>         TCACTCTAATGAATCCCTTAAGCCAGGAGCGTTAGTGTCAAACGCAACGCCCGGGTTCATGATCCTGGATGGCTGGTCAAC<br/>         CAGGGAGATGTCACCTAATAGGTGCCAAATGTACCGCAGAACCTCGTAGGCGTTCCGCCAATTGGACCCGAGGTATAATGTA<br/>         GACGGGCACGCTGACTGGGCAAAAGATTACAATCCAGTTACCATAACAGTGCAGCGGTCAGGATCGGGGCATGAAGGCAATAT<br/>         GTTGGCGCATCCAGTCTTTCCGTAGAAACAGTGGCTAACGACGGAGATACTGCCGGGCAAGAAACCTTGACCAAGTATGCGC<br/>         GCCTTGTGAGTCTCCATGGACTTGCTGCACCTACAAATCCGGAAGGGCGCTTATAGTGTCTGCTAGCACTCCCTGGAATATCT<br/>         TAATCCCGCCAGCTCATGGACGGGAGGAATGTGTTAGACCATAAACAGAGGGCTGGCCAACAATCAGAGGGAAGTAAGCCCC<br/>         GCAAAAGGATTCTGCGGGAACCGAATTACACAACGTAAGGACGTACCTGCTCCTACCCCGAACCCTGTCAATACGATAATG<br/>         CGCCCAAAACGAGGGATCGAGACGGTTCGGAGTGGCAGTCCAGCTTAAACAGGTGCTCGCCGAAACTAGCTGGCCAGGGTGAGG<br/>         CATGGATTCAAAGCCAATGACCGAAGAAAGTTCCGACATACAATTACTCGGCTTTTGGCAATACCCAGGCGAGAGGTAAGCCC<br/>         AAGCCATACCGGAATGACCTGAGATCCACTTAGTAAGTCTTACGAGATGATCCCGACCCAGGACTGGAGCTAGGCGGTTGCG<br/>         CAAGTAACTTCATCATGTATCGCTGGGGAATAATGTTCTGGAAAAAAAAAAAAAAAAAAAAAAAAA</p> |
| <p>ERCC-00019</p> | <p>GGGAATTCCTTTAATGGTTGTACATACTTGACGGATTGCAGTGAGTGTATTCCTCCGTCCTATCGTATGGGTAACCCATAGGGGC<br/>         GTGTCATTCAGCACTTCGGATAGTGTGTTGACCGCGTTCCTCCATGTGCGCTTTCAGGAGAAATAGTACAGGCTGCTGGCTCA<br/>         TGTTTCCTTCTACGCTGCACCTTGCGGGCATAGAGGTTCGGTTCGATCTATATTCGGAGATAACTATTCACCCAGCGCCACTCG<br/>         AATATCCCCTCTTCTGAGCAAGAGGCCAATAAATGCTCAAAAACGAGCGATTGTCCAACGACATAAAGGGAGACTGTAAGGTC<br/>         CTAGCGCTCTGTCTGTAGTGTAGTGTAGTGTAGTGTAGTGTAGTGTAGTGTAGTGTAGTGTAGTGTAGTGTAGTGTAGTGTAGT<br/>         ATCTTCGACCTTGGTGTAGATGGGGCTAGGTCAAAAAGCGGTAGCGATTAGCACTTGTATACACTCTCCCCCTACTAAGTATG<br/>         TAAGGCCTGACCGGAGATTTGTCCATGCTCACCAGGACCGATAGTTGGGCCCGGTAATCTTGCCGCGGTAGGGAGTACGAGC<br/>         AGTGCACCGTTGAAACAAGCACAGGAGGTATGAAGCATCAGACCTGAAAAAAAAAAAAAAAAAAAAAAAAA</p>                                                                                                                                                                                                                                                                                                                                                                                                                                                                                                                                                                                       |
| <p>ERCC-00022</p> | <p>GGGAATTCCTCCGGGCAATTGCCTCTATAACTAGAGCTGAGCCCACCATTAAGCGATTTTTTTCGCACTTAGCCGTAATAAAT<br/>         ATAATGATCCCGCGGTGTAGTAATTCTACGGAATGCACGGAATGTCATAAGCAGAAGGACGTGATGTGCAACCTACTCCCCTT<br/>         TCCCAAGTAAATGTACGGGAATTATCGTTTTCGTTACCGACAACCATGGGGCCACGTGGCCAGTTTGCCCCTATTAGGTGGATA<br/>         GGCCTGAGTACAGAATATATAAAGCGTGACGGATGAAAACGCACCCATTGTCACCGATTGTGACTAGTTGACCCATACACCC<br/>         TACTGTGTTTCAGACGTCGTTCTACTAAAGGCCCGTGCCGCCGGAAGCTCATTTAAAAAGAAGTTCGTAAGTAAGCCGGCGACA<br/>         TATCTAGCAAAACATAGTCCCCCTTCTGCTCAGAGGTTATCCATAAGTACTTACCAGATGGAGTGCCAAGGTACAGACCTCC<br/>         CTCCCAACTGGTTCTGCAGGACGTTGCTATATCACTTCTGGCCGTCTTATGGGTTACCCCTCGCGAGTGCCATCGCATCGA<br/>         CTGACACACCTGCATTCTATTTTATGCTCTACTGACGGCGACGAGTTTTTTGTAGCGTCGATCGCGGAGTTAAGGTCATTGGG<br/>         GAATAGAACCATAGCGCTTGGGTTTGTGACTTTCTCCCTAGATACGCGTTTGTGACTGCGCTACATGGATAAAAAAAAAAAAA<br/>         AAAAAAAAAAAAA</p>                                                                                                                                                                                                                                                                                                                                                                                                                                                    |

Table S11

|                   |                                                                                                                                                                                                                                                                                                                                                                                                                                                                                                                                                                                                                                                                                                                                                                                                                                                                                                                                                                                                                                                                                                                                                                                                                                                                                                                                                                                                                                                                                                                                                                                                                                                                                                                                                                                                                                                                                                                                                                                                                                                                                                                                                                                                                                                                                                                                                                                                                                       |
|-------------------|---------------------------------------------------------------------------------------------------------------------------------------------------------------------------------------------------------------------------------------------------------------------------------------------------------------------------------------------------------------------------------------------------------------------------------------------------------------------------------------------------------------------------------------------------------------------------------------------------------------------------------------------------------------------------------------------------------------------------------------------------------------------------------------------------------------------------------------------------------------------------------------------------------------------------------------------------------------------------------------------------------------------------------------------------------------------------------------------------------------------------------------------------------------------------------------------------------------------------------------------------------------------------------------------------------------------------------------------------------------------------------------------------------------------------------------------------------------------------------------------------------------------------------------------------------------------------------------------------------------------------------------------------------------------------------------------------------------------------------------------------------------------------------------------------------------------------------------------------------------------------------------------------------------------------------------------------------------------------------------------------------------------------------------------------------------------------------------------------------------------------------------------------------------------------------------------------------------------------------------------------------------------------------------------------------------------------------------------------------------------------------------------------------------------------------------|
| <p>ERCC-00024</p> | <p>GGGAATTCACGGAGGAGCTTTGGCATACTAGGCTAGCGAATCTGCAACTAACGCAAGTTACATCCTAGCTAGCGAAGGGCGTC<br/>         CCAATTTTCGCTAACCCGACGCGACGCATAAAAAGCGAGAATAACGCCAAGGGATGTACAATGGATGTTGATTATGCCTTCG<br/>         GGAATGAGGGATGATTTGCGAAAAACAAGTCAATACCTAACCAAATCCGCTAATGGACACCCGTAATCGTGCCCAAGTTTAAAC<br/>         TGGTCGGTAGGTGGCAGGCCAAAGCGCTAGTATCCCTAGGCGCGACACTATAAGTTTACAACCTGCGAGAATTGACACTATGAGC<br/>         GCGCATACTGGGGCCAGAATAGGCAATACCATGTGCGTCCCTGTGTGAACAGCTCGCGGCCATCAGAAGTTGGGATTGACGCA<br/>         TGATCTTGATCGAGCATAACGGCTTCCACCAACCCATAGTACTTGGTAACTATAGCAATCAAGCACGCGTGAGCACAACGCTAT<br/>         CCAAATTTACTACATTAACCTGGAAAAAAAAAAAAAAAAAAAAAAAAAAAAA</p>                                                                                                                                                                                                                                                                                                                                                                                                                                                                                                                                                                                                                                                                                                                                                                                                                                                                                                                                                                                                                                                                                                                                                                                                                                                                                                                                                                                                                                                                                                                                                                                                                                                                                                                                                                  |
| <p>ERCC-00025</p> | <p>GGGAATTCGGGGTCCATTATAGTGCAGGCGTGGTAAAGTAGCATTAGAACCCTACTACTTAGCCCGCGCAACTCGTCCTATTA<br/>         AAAGTCGGAAGGATTAGGGAAGTTAACCTCCGTTAGGGCCTCATTGGCGCGCCTCCACGTATCTGTATTCCCGTGTCGCCGACT<br/>         GGCTAATAAGAGATATGGTGCAGCGTGAACGCGGACCGAACCTCCGGTGTGCGCCGGTTCATGTTACTCGAAAAATAGACCCTA<br/>         CTTGCGCCATGTCATCTTTCACTACGGGGTAGTCTCTCGGCCAGGCTTTGAATCGCCTCATCCGCTTCTCAATGGTTCTGTCC<br/>         TGACCTCTGGAGTTAATCTTCGTCTCATAGAGTAACCAGGCGACGCACCACGCCTAGTTGGTACCACCACTAGAAGCCCGGT<br/>         CGCTGGCTCAGTGCTAATATTCTGGAGGTGAGCCGACAGGTCACATGAGCCTACTCGTCTCGTCAAACACCCGCCAGCCATG<br/>         ATTAACAAATACAGTGATTAAGTGTGTTTTGACCCTAGTGTAGGTGCGTGGTACTTAGCAAGGGGAGTTGCATATGTGGTCT<br/>         CTGTTTCGGGTTATATCTATCATTTACTTGGACACCCTATTGGTTTTATCACAGTCCCTCCACACGACCATACGCGTTGTAAGAA<br/>         TACCCCTAGCGTTGGAGAGAATAAGTTGATGTTCAATTCACAAAACCGAGCAAAGGCTTGTGCGACAGCTTCTACTAGTATT<br/>         CACTACAAAACGCGTACCGACTTTAGGGCGGTAGAGAGAATTGCCATTGCCACGAGGTTCTCCAGAATACAGGGTCCAGGCG<br/>         GCCCCAGCATCGGAGTGCCTGAACTGGCGGGGATGCCCAAGATTGTAGAGGGCCTAACGAGTTGATACGCCCGGGACTACG<br/>         GGGCATTGTCTGCCGCGTCTGTTTCAGGTAAACGATCAACCGGAGACCAGGTTATTCCCATGTCCGTCCCAGGCTTATACTG<br/>         CGGAGATAGGCTGATGATGGTAGGTGCCTTGTCTAGCAAAAACGCGCACAGCTTATGAGCATAAGCGGCTGGGCGTAGGTGAG<br/>         AGAGGGTATGTAAGATCTCTCCTCTATCGGTGTGCGTCTACTCTGCCCCCTTCGACACAAATGTACATCGCGGGAAACGGATA<br/>         CGCCTTACGCCCCAAGGTTTAGCGTATCAAAAAATGCAACGATTCCGATGTCGAACCTTGGATAGGAGCGACCGATTACGTGT<br/>         TAATTGGCCCTGTACCTTTCTGGTCCGTTGATTATCACTCATCCCCAGGTTGTTATGGTCTACCGTGGAAAGCCTCGTCAATGA<br/>         ATACTTTGAGCGGATTGAAGTGTCCGCTACATCGCGGCTATCATTAATAAATTTCCCTTTAACAAAGGTTGTGGACGTCAAC<br/>         GGCCCTGCAGTAGCGTTCCCTTGGACCCGGTTCGAGTACCCAGAGCAGACTACGTATATATCCAAGTGGTTATGTCCGACGGCA<br/>         TTTTGCCAGGTTAGTATCTTCGGCAATGAGTTGCGTCTACGGCTAATCGAGAGCACTTGTGAGTACGCGCAATTACTACATGG<br/>         AGTGTATTCGTTTTGAGCGCTGATACAGTTCTCCTATCAAGGTCGAAAAGGTTGTCTAGAAAAGGGCCGTGCGCGCAGTCTA<br/>         CTGCTACCGGCGACTTTACGACGAAGTTAGGCATCAGACGACCACATGACGGAGAATTACGTACGCCACTTCAGACGTTCTGC<br/>         CTGCGTGCTCTGCAATATAGGCGTAGCAACGAAGCTCGGTGCTGAACTGCTATAGGAATAGCCTGATACGAGCGCACAAACAG<br/>         AACGAACCAGCGAAACTACCCAGATAACATCGCTCCCCGGCATTACTCTGACGGGGGTTGTCACTAGGCTGGTGGTCTCTTC<br/>         GCCTCTCATGTCAATTCCCTTTGTTGGGCTGCTTGGAAAGTACTGATACTAGAGTAGCCTAGTAATACCTAAAAAAAAAAAAAA<br/>         AAAAAAAAAA</p> |
| <p>ERCC-00028</p> | <p>GGGAATTCGAGCTCAAGAAAGTATTCCATTCCGGCTCATGGTCCCGGCTAGACCTGCAAGATCGAAGGTTACTCAATGACACCA<br/>         GTGACTGAGCGGTGAGCCCGGAAATAGCCAGAAATGTTACCATCCCCGCATGTTACACAAACGTGCGGGCTGACGGAACCCATG<br/>         AGAACCTATGGTGAATAGACAGTAAACGAGCGCAAAGGCGTGTGCCAAGGGCTCCCACCGAATGTAGAAGTACTGATCTGATTT<br/>         CGTGACAGGGAAACGCAATGCGAGGTTCCGCAAGTCCACCTATAATCTGTGACCGCTCGTAGAACATGGTTAGGGCCTGATTC<br/>         AGTTAAATCAAGCCACCTCTGACAGAACGACGAGTCAGTGAATCGACTTCACACCTCAGAGTCCACTCACGTGCTGTAAGTC<br/>         AAAACCCAGTGAACCTCTCAACCGTGTAGCGTCTCTAGAATTCAGGCGCCACTGAGGGGCATATGGATGAAGCGTGATACG<br/>         AATTACCTCCAACGAATGCCAGCTGGGAGGAGGATAGGGACTATGTCTTCGTCAATGCTCCCGTCAAATGCCTTTCTAAATAC<br/>         CTTTTGACCTCTCTGTGTGGAATGGGGTCTAGAACCAAGGACTAAAGCGGTGCACGAGGCCCTTTGGATATGTCTTCTTGG<br/>         GAGGGCCACAGCCAAAGCCACCCATCACAGCTGGAATCTAATCTTGTGACCCAGTATTAACCGTGAGATCTACACAACCGAC<br/>         AAGCGCTAGCTTCCCTCCCCGGTCAAGTAGTAATGCCGGGATGACTTTGCGTGTCTATAGCGATCGAGCCCTCGAATTCACGT<br/>         CGTCAAAGTGAATGATCAGATTAAAGGGCTGTGCGGAGGGATGTGTAGGCCACTAACCCCTCTGCACGAACTATAGATAC<br/>         GTCTTTCATCGGTACGCTCGAAAGCGCAGGTGGCTCCCAAATCGTGGGGAGTTAATCGAGCTGCGGATTGGTCCCACGCCTT<br/>         ACGGCAGCGAACATAATCCCGCTGATGTGAAGTCGATCTACAAGGTAAACAACGGGGAATATAATTAGTTGAACCGGTGTGG<br/>         AGCCTGCACTTGAACGCTGCATAAGGGACCCAACAGCCCCAAAAAAAAAAAAAAAAAAAAAAAAAAAAA</p>                                                                                                                                                                                                                                                                                                                                                                                                                                                                                                                                                                                                                                                                                                                                                                                                                                                                                                                                                                                                                                                     |

Table S11

|                   |                                                                                                                                                                                                                                                                                                                                                                                                                                                                                                                                                                                                                                                                                                                                                                                                                                                                                                                                                                                                                                                                                                                                                                                                                                                                                                                                                                                                                                                                                                                                                                                                                                                                                                                                                                                                                                                                                                                                                                                                                                                                                                                                                                                                                                                             |
|-------------------|-------------------------------------------------------------------------------------------------------------------------------------------------------------------------------------------------------------------------------------------------------------------------------------------------------------------------------------------------------------------------------------------------------------------------------------------------------------------------------------------------------------------------------------------------------------------------------------------------------------------------------------------------------------------------------------------------------------------------------------------------------------------------------------------------------------------------------------------------------------------------------------------------------------------------------------------------------------------------------------------------------------------------------------------------------------------------------------------------------------------------------------------------------------------------------------------------------------------------------------------------------------------------------------------------------------------------------------------------------------------------------------------------------------------------------------------------------------------------------------------------------------------------------------------------------------------------------------------------------------------------------------------------------------------------------------------------------------------------------------------------------------------------------------------------------------------------------------------------------------------------------------------------------------------------------------------------------------------------------------------------------------------------------------------------------------------------------------------------------------------------------------------------------------------------------------------------------------------------------------------------------------|
| <p>ERCC-00031</p> | <p>GGGAATTCGGGAGAAAAGCTTCTTGCCTAGTTACAGCACGAAGATTGGGACCCATCGATCAGCGCCTCCGTGCAATGGCGCCT<br/> TGGTACACTCTCTAAAATGCAGTCGGTAGCGGGGCATGTAGTTACTGCGGTGATATTAAGCTAGTGAGTAACCTTATATCGAA<br/> CTGTCTACCAAATTGATGTATCTACATTAGCCGTACGATGAGACAATGAACCGTGTCTACGCTCGGGAGCATTACCCCTATCA<br/> TGAGCCTACAAGCACCTGACTAGACCAGGAGACAACCTTGAGCGAGACACTAGCGAGAGGTGCCGATATAAGGTACATTGTTGC<br/> GGATGTCAACATCGCATTTTTTATCCCCTGGCGGGATGCAACTAACACCAGTAATGTCGTTCTCCACGACCCCTACCCGAAAA<br/> CTTACTCGTATGAGTACTTTTCGCGACGACTCGGCTGTGTAGTTTCCAAGCAGGCCCTGGCTAGACCCATTTGTACCACGCGG<br/> AGGATCATCGGAATCCATAATCGGCCACAACTAGCCGGCTGGAAACCTTGTGATATCATGAACGAGGAGTAAGAGCTGGTTA<br/> GTGAATCACCTTGAGGGCGAGGAACACAACAATTCTGCGGGTTAGCAGGAAGGTTAGGGAACCTCGCTCATAGCATATTAGTAC<br/> CGCTATCTCCTTTCTTGGCGCGACATCTCCCAAAGTTAGGCTGATTCTGCCGCCTGTGATCGCTATCCTTATTTGTGGCAGA<br/> ATATGTCGATGCAAAAAACCTTAATTCGTGCTTCATACATCATCCCCGAGAACTCCACGGCTCCACTCCCGCTTATCACGCGT<br/> GGGTGCTAAATGATACGAAGTGTGGCAGTCTATGTTAACTTGGAGCATCATATTTATTTCTGTTACGGATGAAGGCCTATAT<br/> CAATGATCATTAAAGACATTCCGTCATCGGCTACATGCAAAGAGGCTTTTCCACCCTGTTTCGGTGATTCAGGTGTCGAGCGA<br/> CCATTATCTGTGCGCTCATCACCGAACCGGCCGTGATAGAGTCTTCGCATCAGGTTACACCATGTCGACTGATAGTAACTGTG<br/> GTTTCGAGTTATGCGTGTGACACACCGTTGAGGCGCCCTATTTAAAAAATAAAAAAAAAAAAAAAAAAAAAA</p>                                                                                                                                                                                                                                                                                                                                                                                                                                                                                                                                                                                                                                                                                                                                                                                                                                                                                                                                                                         |
| <p>ERCC-00033</p> | <p>GGGAATTCGAGCTCGCACGCCCTATTTAACTGGAAACCTTCCAAGATTTCGGAGAGCATATAAGTTGGGCCGAAAGCTCAGCTG<br/> TGAGCTTTGCAAACTCTGTCTTAGGAGCTAAGACAAATAGAGAAGGTGGGCCATCAGCATTAGCAGCTGCAATTATTGGAAAA<br/> ACACCATATTATGGATATCACTTAGATGAAAATAGAAAGACAACACATATCATTGAGTTAGATGGACAATTAATCTCTAACTT<br/> TAAATATGGAGAGAGTTTTTATGGAGCTTTAGGTTACTTAGTTGGGAAGATTGTTAAGAATGGCATTCATATTTTGAATC<br/> TATATAAATTAATCCAAATAACGATAATTTAAATCCTTGGGAGCTGCAATGGCTGCAAGTGGTGGTATCGCCTTATATCAC<br/> GCAAAAACTTGACAGCTGAATGCAGAGTTAAAGAAGTTGTTAATGATAAAATTGAAAAGATATCTATTGGAGTTGAGGAGAT<br/> AAAGGAAGCTTATGAAAAATTAATACAACAAATGAAGAGCCAGATTTAATTTGTATTGGTTGCCCTCACTGCAGTTTAAATGG<br/> AAATTAATAAATTTGCTGAACTTTTAAAAAATAAAAAATGAATGCTGATTTATGGGTTTGTGCTCTCTTCATATTAAGCA<br/> ATAGCAGATAGAATGGGATATACAAAGATTATTGAAAAAGCTGGTGGAAAGGTAGTTAAAGACACCTGTATGGTTGTTTCTCC<br/> AATTGAGGATTTAGGTTGTAAGAGTTGCAACAACTCTGAAAAGCTGCTGTTTATCTACCAAGCTTTTGTAAAGAGTGAAG<br/> TAATTTTGGAGATATTGAGGAATTGTTAAAGGGAGATAATGCTGAATCCAATAATCTTATTTTGGCTATTATTTTGGATA<br/> GAATCATTGGGGAGTTGCCAGAGAGTATTCATCCAACGGTTTGGATAGGGAAGTTGATAGCTTTTTTAGAGAACATATTTAAA<br/> TCTACAAATTGCAAAAAATAATATAGAGATTTTTTGTGGCTCACTAGCAACGTTTATTACTCTATTAGTTGTGGGAGTTAT<br/> AGCTTTTTTTGTTGATAAATGCATAATGCTGTTACCATCTCCTTTAACTATATTATCTATGGTTTTTTGTTATCAACAATA<br/> TTGGCTACAAATCATTATTCGAATTCGCAAAAAGCCGATTGAATATATAAAAAATGGTGATTTAGAGGGAGCAAGGAAAGCT<br/> GTTTCAGCATATAGTTAGCAGAGATGCCTCAAAGTTGGATAAAGAGCATGTATTATCGGCTGCAGTAGAGAGCTTATCCGAGAA<br/> CATAACAGACAGTATAAATTGGAGCTTTATTCTATGCTATATTTTTTGGTTTGCCTGGAGCCTTTGTTTATAGGGCGATAAATA<br/> CATTAGATGCAATGATTGGTTATAAAAATGAGAAATATCTATGGTATGGGAAGTTAGCAGCAAGGTTGGATGATATTGCCAAT<br/> TTTATTCCTTCAAGAATAGCAGGGATTTTGCTAATAATTACTGCCCCATTTTATAAAGGAGATGTTAAAAGGCAATATATGG<br/> GTTTTTAAAAGAAGCTAATAAGGTTCCATCACCAAACCTCTGGTTATACAATGGCTACATTGGCAAAATGCATTAATAACTT<br/> TGGAGAAGATAGGATATTATAAATTTGGTAGTGGGAAAAATAGATGTTGAAAAATCTTTAAACGCTTTTAAAGGAGTTGATTAT<br/> ACAGTCGTTGTGTTTTTAATTTATTTATACCTTAATTTGGTGGATAACATGATAAGTAAAGCTTATTACACTACAGAGATTCCA<br/> GAGGATAGATTTGAAGCTCTGAGTTGTATTAAAGATAGTCAAAAACCTCTTAAATTTATATTACTTGGAGGAGTTGATAGTGG<br/> TAAAAACAACATTAGCTACTTTTTTGGCAAAATGAGCTTTTAACTTAGGATTTAAAGTTGCTATAGTCGATAGTGATGTAGGGC<br/> AGAAGAGCATTTTACCTCCAGCAAAAAAAAAAAAAAAAAAAAAA</p> |

Table S11

|                   |                                                                                                                                                                                                                                                                                                                                                                                                                                                                                                                                                                                                                                                                                                                                                                                                                                                                                                                                                                                                                                                                                                                                                                                                                                                                               |
|-------------------|-------------------------------------------------------------------------------------------------------------------------------------------------------------------------------------------------------------------------------------------------------------------------------------------------------------------------------------------------------------------------------------------------------------------------------------------------------------------------------------------------------------------------------------------------------------------------------------------------------------------------------------------------------------------------------------------------------------------------------------------------------------------------------------------------------------------------------------------------------------------------------------------------------------------------------------------------------------------------------------------------------------------------------------------------------------------------------------------------------------------------------------------------------------------------------------------------------------------------------------------------------------------------------|
| <p>ERCC-00034</p> | <p>GGGAATTCGGTATTACCCAGCACTCGTATGGCGCCCCATCGTTGTATCAGCAGGAGCATATGTTGCTCTTGATTGTATCACTT<br/> CGCGAGAAAGACCCCTTGAATACACGAGCTGCCGTCCGGATAACGATGTAATAGCCTATGGAGGGGAAGTAGTCATGTCTGCG<br/> GACTATTGGTAAGAGCACCCGCTCGTCTGACGTGGACACGAAGCTGTTCCGGCCGACGCAAGTACCTCCCACTTAGAAAGCGA<br/> ATAACCCAACGACCGTGTTC AACCCCTGGCCGTCTCTCAACCAGGTATGCAATCAACGACATTGGCCCAGATGTAGGGCCGTCT<br/> TGGTGGATTGAAACTCGGATCGATCACGTATGGTCTAGACCTTATACAACACCTGTGCGTGCCTCTGCGTCTGGCGATGGTGG<br/> GTAGCGGTCCGGACCACGATCGTACTGTAGGCGGCCAAATGCGGATCTTTAGGTTGACCGATTGTACATCTCGCCATAGCCC<br/> TTTTCGTCACAACCTTTATAAAAAGGGTTCAGGCCACTGTGTGAATCAGATGGCAAGCCCGTATCCGTATAGAAACATACGTTT<br/> CTCTGGCCACGACCAATAATTATGCACTGTGGCTCGGAAGCGGGTCTACGGAGAACATTAGATATCGACCTAATATCCTGAT<br/> AGCTAGCTTTCCCGAGGATAGGCGAGGATGGGCGTGTAGACACAGGAGCATTGCATCACATGAATAAAGGGCTACGTACGCA<br/> GCGGCGTTAAGACAGACTTAGACTGATCACTATGAAATGATAGACACCATGTGCGCAATTTGCTCCCTCACTCATATCGTTGTA<br/> TCATAAAGTTGATCCTAATCACAACCGAGTAACGAGCCAGACTAATCCGGAACATTCGTAAGCGATAGTGGTTGGCTCCTCC<br/> CGGTCCGCGAACTGATATCATAGCTAAGTATGCTGGCCTCGGTTAACCGCGAAGGCATATACAATGGATTGCTGTCCGCGTA<br/> GCAATATAAAAAAAAAAAAAAAAAAAAAAAAAAAAA</p>                                                                                                                        |
| <p>ERCC-00035</p> | <p>GGGAATTCGGGAGAGGTATCGTAAAGGTGAATCCTGTGGCTGTAGGAAGCAGTTCATATGACCAACGGGCGCCCTAGGGTATA<br/> CTCCAGAATCGAATGTTACCAGAAAATAGGGGAACTGGTTCGCTCCTAGGTAAGGTTGCCTGTCCCCGCACTGTACGAAGGTCC<br/> GGTCAACGGAAGCAGGCACACGCGCTATCTGAGTCCAAATACTTGATCCGGCCGGAAAATTAGAGGTGACGGCTTCCCACTAC<br/> TGATCTCACTGACGTGCAATCATCCTGTGTCCGGAGCAATGACAGTGTCCAGTCTGTTATGGACGAGCTGGACGATTACAGA<br/> TAAGGACAGTCGCCCGGATAACCGCAAATAAATCTTGCTGCCTCCGAGGGTGTGTGAAGGATAACTGTCGCCCTTAAGTAAA<br/> GATCTACCATTCCGCCGGGCAACGCGGCTCTCTGATGCTACGACCAAAGTGGTTGACATTACGCCAGTAATGGACTAAGGTTG<br/> AATTTGAGCGGATGGGCTCAACTGCGTTCGTAACCGGTAGATACAGGGCATAACGAGCCTCCCTATTTAACGGCATCATCCCGCG<br/> TAGTGCTGGTCAACCGACTGTCTATTGAAGTCAGGTTTCGGCTACATCAGCTGGAACGTTCCCGTAGCTACTATAATCAGGCA<br/> ATCTGTCCCGAAGAGCCACACCCTGACTTGGCCGTAAGGGAGCCCTAAATCAGTTAAATACGGGGAAGGAGTCTCGCCCTCC<br/> GGGTGATCCATCTTATTTACCAAAGAACATGTCCACGCTGTGGGCTCTGAAGATGGGCGACACATGTCTACCCTGGCATAAC<br/> GCCCAGCTTGATAAGAGTGAAACGACCCATCTGACACAGGCCGGCATAGAAGACCAGCGCAATGCGAGGGCCACACATAGGAG<br/> TGTGAAAATCTACATCAACATACTTCGGCCGTGGCTGAACGAGGGAGTGCTTGTAACAATCCCGTTGTTTGGTGTGGCAGATTC<br/> CGGGAAATGAGCAAACGCTTCTCCCATGAACACACTCACAGCCATAAGTCTACCTTGCTAACATCGCCCCGAATGCAGAGCC<br/> ACCTACTGGGGTTGTCTGAGAACAACCTCCATGGGTCAAAAAAAAAAAAAAAAAAAAAAAAAAAAA</p> |
| <p>ERCC-00039</p> | <p>GGGAATTCGAGCATGGCCTAACTGAATGCGCCTGCAGTATCTTTCTTAGTATATCAAGATCCGTAATATAACGGTTTGCGCGA<br/> CTACGGTTACCGTCTTTATAAGTGAACAAAACCGGCTACCAGCATGTCGTATTTCCGCCACCCATATAAACCCCACTTTCGTCTT<br/> CAAGGAATCCAAAAGTCGGACGCGGTGGCTTGTCTCTTCGTCAGAAGGTTGAAACCAGTAAAAAGACGCGATAGATAGGCC<br/> TAAGTGGCCCTCCCCTTTGCCAAAATCACGACGAAGTGACTAGTGCAGGCGTCTGATACTTACTCCTCATGTTACAGCCACGC<br/> TGCATTGGTAGGCTGTTAGAAGCCGTGACCGAACAGGGTATGATGACCTCGCCATGGGCACCCTTGTAATTCTCGGGGGCGGAT<br/> GTAGAAATCAAAGCTGTTTACTAACCATGTACTGTCTAAGAGATTGGCTGTGACCGGTCCCGGACACTGCGTCAACGCAGGT<br/> CGCTCACGATCGGCGTGCGCATTTTCGTGAATCATGTATAGTGGTTCTCGTTAGATACACATGTAAGCTGAATGGGGCCCTAC<br/> CCAACCGGTTGGGTCTATAAGGCAGATGTGCGACGCACCTATTGGTAGGCCAATCTTATGGTTTGCCTCTTGTACTGAGGGTA<br/> CCGCAGAGGTCCACTGGTTAGCTCACACTATGATCTAGGAGCAGTTGGGCGGTAACGGCAAAAAAAAAAAAAAAAAAAAAAAAA<br/> A</p>                                                                                                                                                                                                                                                                                                                                                                                                                                    |
| <p>ERCC-00040</p> | <p>GGGAATTCAACTACGATCCCATGAGAACACCTGTAGATACTCAGGTCTCCGCGGACCTACGCCGCGGACGATGATAAAGTCCG<br/> AGAAACCACCGGATGCCCCAACAGACGGCCTAGCCCATCGAACTAGGGAAATGAACTATATCGTAACCAAGCCGGGTAGCTG<br/> CGGTGGTGCTAGACTAGATGTTAGCGTTCAGTTCGAGCTGTTACGTGTAACGCCATTGAGACCCTTACCCTTTACCGGTCCGGCG<br/> GATACGTCCAGCTTCGTCACCTGCGTTCGAGCCTTCTACACGATCCAAGTTACCAGCGCAGTTTAAAGGTACGTGCTTTCGACCA<br/> GAACGAGAGTTTCGACGAAGGGGGAGGAGTTGGATTCTTAGGGAATGAGGCTGAACCTAACTCCTCGCTACATTCCTATTGTT<br/> TTCCCGATCGGCTTCATCGGGACGCCGGAGACCGCACCTTTGCCCGTTTAAAGCTCGGACGGGATGCCACGGTCTGTTCCACA<br/> ACCCGGTTCGGAGCACACCCTCTCTATGCTGCGTCTATGCCTTCCGGGTGGTTGAGGTGAGCCATGTGGTCTTAGAATCCGGTT<br/> GTATTAGACAGTATTGTGCTTGACGTCGTGGTATCGGGTGGTTGTGAAGGATACAGATATTCTATGGGCAGCGATGGGGCTTC<br/> CTCAGTCCGTCTACGGCCCACCAGACAAACAACCTCGGGATACAAATTGAGCACCCGCGGACCGGAAAAAAAAAAAAAAAAAAAA<br/> AAAAA</p>                                                                                                                                                                                                                                                                                                                                                                                                                           |

Table S11

|                   |                                                                                                                                                                                                                                                                                                                                                                                                                                                                                                                                                                                                                                                                                                                                                                                                                                                                                                                                                                                                                                                                                                                                                                                                                                                                                     |
|-------------------|-------------------------------------------------------------------------------------------------------------------------------------------------------------------------------------------------------------------------------------------------------------------------------------------------------------------------------------------------------------------------------------------------------------------------------------------------------------------------------------------------------------------------------------------------------------------------------------------------------------------------------------------------------------------------------------------------------------------------------------------------------------------------------------------------------------------------------------------------------------------------------------------------------------------------------------------------------------------------------------------------------------------------------------------------------------------------------------------------------------------------------------------------------------------------------------------------------------------------------------------------------------------------------------|
| <p>ERCC-00041</p> | <p>GGGAATTCGAGCTCGGTACCACCGAGCTCAAGATGCGTTAATTATGTGGGTGACGATAAATGAGTGAGCAAAAAGACATGTAC<br/> GTATTAGGAATTGAAACAAGCTGTGATGAGACTGCTGCAGCTATTGTGAAAAGCGGGAAAGAGATCATTTCAAACGTAGTAGC<br/> CTCTCAAATTGAAAGCCATAAAGCGCTTCGGAGGCGTTGTTCCGGAAATTGCTTCAAGACATCATGTTGAACAAATCACTTTGG<br/> TTATAGAAGAGGCGTTTTCGCAAAGCTGGCATGACGTATAGTGATATTGATGCGATTGCAGTAACAGAAGGTCCGGGACTGGTG<br/> GGAGCGCTTCTTATCGGAGTGAATGCCGCTAAAGCATTGAGCTTTGCATATAACATTCCGTTAGTAGGCGTTCATCATATAGC<br/> CGGTCATATATACGCGAACCGTCTTGTAGAAGACATCGTGTCCCGGCACTGGCATTGGTCGTTTCAGGAGGCCATACAGAAC<br/> TGGTTTATATGAAGGAACATGGATCATTTGAAGTCATTGGGGAACCCTTGATGATGCGGCAGGAGAAGCCTACGACAAAGTG<br/> GCGCGGACGATGGGATTGCCATATCCGGGTGGACCGCAAATTGACAAGCTAGCTGAAAAAGGGAATGACAATATTCGCTTCC<br/> TCGCGCATGGCTTGAAGAAGGCTCTTACAACCTCAGCTTTAGCGGATTGAAGTCTGCGGTGATCAATACGCTTCATAATGCAT<br/> CCCAAAAAGGGCAAGAGATTGCTCCGGAAGATTTGTCTGCCAGTTTCCAAAATAGTGATGATCGATGTCTTGGTAACCAAAACG<br/> GCGCGCGCGGCAAAGGAATATGATGTCAAACAGGTCCTTTTAGCCGGAGGAGTAGCTGCAAACAGAGGGCCTCAGAGCTGCATT<br/> AGAAAAGGAATTTGCCAGCATGAAGGGATTACGCTTGTCAATTCCTCCATTAGCTTTATGCACGGATAATGCTGCGATGATTG<br/> CTGCTGCTGGTACAATTGCTTTTGA AAAAGGAATTCGCGGTGCATATGATATGAATGGCCAGCCCGCCTTGAATTGACTTCT<br/> TATCAAAGTCTCACGAGATAATAGCGTGAGACTCCCGGGTACAAAAA AAAAAAAAAAAAAAAAAAAAAA</p> |
| <p>ERCC-00042</p> | <p>GGGAATTCACCAACTCTGGCCTTTGTGTTGCTATTCCCCAAGCACACAATCCAGTATAACATCTTCCACAAACTCTACAGCCA<br/> AGAGCAACCATTGCAGCAGTTCCAATATAGACAGCATCTGCTCCTAAAGCTATAGCCTTAAATACATCTGCTGAACATCTGAT<br/> TCCTCCACTTGCTATGATGCTAATTTGTTTCTCAAACCTTCTCTCAATCTTTGATCTACTGCGGCAATAGCCATTTCTA<br/> TTGGGATTCACCATGGTCTCTGAATACCTTTGGTGCTGCCCTGTCCCTCCTTTATATCCATCTATAACAACTGCGTCAGCA<br/> TCACTTGTGCTATTCCAACAGCAATAGCTGGAGCATTATGGACAGCTGCAATTTTAAACAAACACTGGCTTTTTCCATCTTGT<br/> TGCTTCTTTCAAACCTTCTAACTAATTGAGCTAAATCCTCAATTGAGTAAATGTCATGGTGAGGAGCTGGTGAGATAGCATCAC<br/> TTCCCTCAGGAATCATTCTTGTGCTGAAATTTCTGCTGTAACCTTCTCTCCAGGTAAGTGCCCTCCAATTCAGGCTTAGCT<br/> CCCTGCCCTATTTAATCTCTATTGCAGAACCTTTATAAGATACTCTTCATTAACTCCAATCTTCCACTTGCAACTTGGGT<br/> AATTATGTGGTCTGCATAAGGGTAGAGAGCTTTTGGCAATCCTCCTCACCAGTTCCCATGAATGTTCCACATCTTTAACTG<br/> CCTTAGCAAATGATAGGTGAGCGTTTAAAGACAAAGCTCCATAAGACATATGGGCAATCATTATTGGGGTATCTAACTTTAAG<br/> TTTGGAGCTATTTTGT TTTTAACTTAGCTTTTTTAATCTTCTTGCCATCAATCTCTTCTCAACAAATTCAAACCTAACTG<br/> CTTTGGTTTTTTTACCAATGTAAGTTCTTAATTCATTGGCTCTCTCAATGGGTGATGGATGGGTTTGTAACTTGCATGCATC<br/> TAAACAATCTAAAAA AAAAAAAAAAAAAAAAAAAAAA</p>                                                                                                                                          |
| <p>ERCC-00043</p> | <p>GGGAATTC AATACCTTTACAAATGCTTTAACAAGAGGAAATTGTGTTTTTGCCAATTTAAGACCTAATTTAATAGTTAAACCA<br/> TTAACCTTAGTTGTTCCAAGGCATAATATAGAGAGTGAGATACAGGATGAGCTATTTAGGGAGTTATTCAGTATGCAGTTGC<br/> CAAGGCAGTTGCTGATTTAGATTTAGATGAAGATTTAAAGGTTGTTGTCTCTGTTAATGTCCAGAGGTTCCAATAACCAATT<br/> TAAATAAAAGAAAACCTTTCCAATACTTCTATGCCTCAGCAAAGTTAGCTATAAACAGAGCTTTAAATGAATATCCTTCAAAA<br/> GAGAAGGTAAAGAAAGAGAAATATAGAGCTTGCATCCATTAGTTGGATTTAGGGATGTTAGATTGGAGTATCCTCCATATCT<br/> ACAAATTGCTTTGGATGTCCCAACTATGGAGAATTTGGAATTTTTGTTACAAACAATTCCAAATAGCGACCACATCATCTTAG<br/> AGGCTGGAACACCCTAATTTAAAAGTTTGGTTTTAGAGGTTATTGAAAATAATGAGAGAATATTTTGGATGGCTTTATTGTTGCT<br/> GATTTAAAACCTTAGACACTGGAAGGGTTGAGGTAAGATTGGCATTGTAAGCAACAGCTAATGCAGTGGCAATAAGTGGAGT<br/> AGCACCAAATCAACAATAATTAAGCTATCCACGAATGTCAAAAATGTGGTTTTAATCAGCTATTTGGATATGATGAACGCTCT<br/> CTGAACCTCAAAAATTATATGATTCATTAATAATTAAGCCAGATGTTGTTATCTTGCATAGAGGGATTGATGAGGAGACATTT<br/> GGAATTA AAAAGGAATGGAATTTAAGGAAAACCTGCTTATTAGCAATTGCTGGAGGAGTTGGTGTGAGAAATGTTGAAGAGCT<br/> TTTAAAAGAATATCAAATATTAATCGTTGGTAGAGCAATTACAAAATCAAAGACCCAGGAAGAGTAATTAGGATTTTATAAA<br/> CAAGATGGGTTAAAAA AAAAAAAAAAAAAAAAAAAAAA</p>                                                                                                                           |

Table S11

|                   |                                                                                                                                                                                                                                                                                                                                                                                                                                                                                                                                                                                                                                                                                                                                                                                                                                                                                                                                                                                                                                                                                                                                                                                                                     |
|-------------------|---------------------------------------------------------------------------------------------------------------------------------------------------------------------------------------------------------------------------------------------------------------------------------------------------------------------------------------------------------------------------------------------------------------------------------------------------------------------------------------------------------------------------------------------------------------------------------------------------------------------------------------------------------------------------------------------------------------------------------------------------------------------------------------------------------------------------------------------------------------------------------------------------------------------------------------------------------------------------------------------------------------------------------------------------------------------------------------------------------------------------------------------------------------------------------------------------------------------|
| <p>ERCC-00044</p> | <p>GGGAATTCGAGCTCAGATAGTGACTAGGGTAAATGCCAAGCCGTCTTATAAAAGCGGTAGCGAGAGATCTTAGAACTCCCGGCGAACGCCCCAACTTATGCGATGTCCAGCCCCAAACGGTTGATTAGATCGGTAGCTCCCGAACTAAGAGACCCTAAACGCTATCCGTGGACTGTGTAGGTAGGCCGTCGTCTAAGTGGCCTCGTGAACCTAACGCCTGCTGCTATGTCCCAATGAAGGGTACATGCCCTCTTCCCCTACTACGCCGATACAAAGTCCCGAACGAGCTTACGAAATATAGCGCTTAACCATGGGGCCACCATAGGTGCCTGTACAGACGTGTCAGACGAGCCCTCGGCTAGCTCATAATTGCGGCCGTTTATATAAACCTCAGCGTCTGGTCATGTCTGTACCACAACGCTCCCGGTTCTTCGACGCTCAGTTCGGTACCCAAGATAGCGGACTCTCAAAGAACGATTACAGTAGTCGCCGTACCCATGTAGGCCTTAAGAGGTCTAATTAGCTCTAGGAAACACAACCCCGGGATTTGGGATACGCCACCAACACGAATCCAGCCGCATCGCACGCGTCGAAGTCCCTCCGTGCTTGTGTGAGTCGACACATAGGATCGGGCACGGAGAGATCGGCGGTTGAAGTATGGAGCGTAGGTCTCGATCTCGTACAAAACGACTATGACCATTGGGCGTTGTAATCATTATCGTTACGATTTTACGGTGGCAAACGAAGCTACCAAGTAGATGCCGACGTGAGTGGATCCACGCAGTCCGAGACAGCGCACACTCGCTGTAGAGGGTTTTCAATCCGACTAAGACGGCGGGATCTACTACTTCTGCGAGTTTGTAGTAACTGTATCTCCCGAATGCGCGTTCTAAAACCCTGACGTGATGGGACGGGTGAAGCACCCGGTTTTTCGCCGTTAGGTAAGGTAATAATATGACCTTACCCTACGTTGATTGTGGTCATTACAGCAAGAGGTGGGTTATAACGCAATCTATGTTGCGATGCTATGTTATTTGACCCCTGCGGTAAGATTATTCCTCGTTCATGGATAACCCGATAATCCCGTATAACCTGTGGGTATTATAGGCGACAATTCGAAAAGGGCGAATTCAGGCCTGAATTTCTGCAGAAAAAAAAAAAAAA</p> |
| <p>ERCC-00046</p> | <p>GGGAATTCATCTCCTCTAACTTTGGAGAGGTAGGAATGGGAGTATTTGCACTTGTGGTAACGGTATTTGCATTATTGATGGTTTACTATGTTGGGTATGCTGTTTCGATTTCTTAAAGGACTGAATATTCGGTGGCAGTATGGGATTTCTAAAAATAATGTTAAGAAATTTTGCTGGTTTTTTGCGACGTTGGTGTGATTCTATAGCTCCATTATGGCCGTTATATGGAATCATTGGAGTGCCAGTAATTCACACGCCCTTATATTTAAAGACAAAAGAAGTGTCTAACAACAACATCCACACTACTCCTTGTTCATATTTCTTCTGAATTGCTGATTCTTATTGGATTTCTGATATTTCTTATGTTATGGGCTATTACATCTCTAAGGAATTGGTGAAGTAAAAATGGTGAAGCTTATGAATTTGTGGAGTGAGAGGATTAAGATAGGGAAGTTGTTGAAGTTATTGGCTGTGAGAGAGTGCCATTGATGAAACGTAAAAAAAAAAAAAAAAAAAAAAAA</p>                                                                                                                                                                                                                                                                                                                                                                                                                                                                                                                                                                                                                                                                    |
| <p>ERCC-00048</p> | <p>GGGAATTCCTCTGTAAATCCCGTAAACGAGTAGTACGAATCCGGACTTGAATACACGCGTCAATCCCTTTTATATCCTAGAATGGACCGTGTGGACGGCAACTCAGAGATAACGCATATCTATGTGCTCGCTTGCCCATCAAAGAAGAGACGGCGACCAACGGACGACATATAGTGACATGGTCAACCCGTACGCCCTGCTTCGTAAGCCGACGGTCCCTTTGAAGAGGCTGGCGAATCATGTCGTTTTGTGCTTACTATTACATGCTAGCTTGGTTGGGGCATCTCGGGACAACGTCTATGTACAATAAACACAAAGCCGCGTAGTTATCTTCCGCGAGTTCCGCCAATACATTGGCGGTGACTTGAGACCGCTAAAATGCACATAGAAGCCTCAAACATGGTAAGACTATAGATAAGCGGCGCGAAAACACGGCATTGGAATGATGTGACTGGGAATAAGACGACGTCGCTATGGCCTCTCCGGAAGCGGTGTATGTGCCAAGCGATGTTTCATTAATGTAACGGACAGGTGCTGAGGTGGCTTTTCGTTGGGGCGCCGTCTTTGGGGGAGATTGCGTCAATTTTGACTGTCAGATCAGCGACTAGATTTTAGGCAGATTAGTGTGCCACCTGAATCAATAGAACAATATCAGTTATGGCGGTGCAGTATACTATACAATGGGTTGGGCGCATCTGCATGTCTCATGTCATGGCAATCGACCTCTAGTCTGGGGTGATCCGAGGCGTTCTCTTATTAGGAATAGTGCAGGACCCGAAACCGCCATAGGGAAAGGGTGAGCGAGGTAGCAGCGTAATAATTCCGCGGTGGGACAGGAAATGCTTAGTGTCTCAAGACCTAAGCGACAGCGTGACCTTGTTTCACTTACCTCTGAAGCTCTTCCGACGTTATAGATATTGGCATCCCTAAACAACGAGTACCTTGTGCTACGACAGAAAAGTGACCTGAAAAAAAAAAAAAAAAAAAAAA</p>                                                                                                                                                                               |
| <p>ERCC-00051</p> | <p>GGGAATTCCTTACAATAGATGCGTTTTAGAGTAGCTGGGGGAATTTTGTCTTTTAAAATAGCTTGGGACATGCTTCACGCAGAAATTCACAAAACAAAGCACAAACCAGATGAAAGATTAGACCTTGAAGATATTGATAGTATAGTTTATGTCCCATTTGGCTATTCCCTTAATCTCTGGCCCTGGAGCTATAACAACAACCATGATTTTGATTAGCAAACCCAGAGTATCTTAGAGAAAGGGTTGTTGTCTCTCTATAAAAAAAAAAAAAAAAAAAAAAAAA</p>                                                                                                                                                                                                                                                                                                                                                                                                                                                                                                                                                                                                                                                                                                                                                                                                                                                                                                                  |



Table S11

|                   |                                                                                                                                                                                                                                                                                                                                                                                                                                                                                                                                                                                                                                                                                                                                                                                                                                                                                                                                                                                                                                                                                                                                                                                                                                                                            |
|-------------------|----------------------------------------------------------------------------------------------------------------------------------------------------------------------------------------------------------------------------------------------------------------------------------------------------------------------------------------------------------------------------------------------------------------------------------------------------------------------------------------------------------------------------------------------------------------------------------------------------------------------------------------------------------------------------------------------------------------------------------------------------------------------------------------------------------------------------------------------------------------------------------------------------------------------------------------------------------------------------------------------------------------------------------------------------------------------------------------------------------------------------------------------------------------------------------------------------------------------------------------------------------------------------|
| <p>ERCC-00053</p> | <p>GGGAATTCACATCTGTATAAAAAACACTACAGGGTGGTAACATGGTTCTATATAAAAATTAGAAGATCAAAAAACGATCCCTGT<br/> CCATCAATACCTTCAGCGGTAATTATAGGATATTCTGTTGGATTAAAAATTAATTAAGGACATGGAGCTCAGAGCTTAAGCAA<br/> TATGGCTGGTTCTTATGCTGGAAAGGAATTGGGAATTTACGCAATGAATAATGGTTATGAATTTAAGGATATTAAGATATTG<br/> AAAGATTTCTTAACCAGTTAGATTTTGC AAAGATAGAGATGAATGAGGAAGAGGATGAAATTATAGTAAAGATATCAAAATGC<br/> AATCTCTGCCCAAAGAGAATTTGTGGCTATGAATTTGAAGGAACAGCATGCCCTTGGGGAGGATTGTTAATTGGATTTATAAG<br/> TGAAACTTTAAAGTATAAATTTAGGCTACCAAATGAATTTAAAGCCAGCTGAAACATGTATTATTAATTAAGAAGAAATAAA<br/> ACTTATCTAATATTA AAAA ACTCCAAAATCTCATAAGGATGCTTTAATAACAATAACATCCTCCAACCTCATCAATTTTCTTGT<br/> ATTTTCAGCATCTATCTTTCTAACCCCTCATCTTAATCTCTTTTCCCTCAATTATTGCATTATAAGGGCAAACCTTTTTTACAAT<br/> TTCCACATCCTAAGCATTTAGATAATAATATCTCAACAAAATTATCCCTCTTAACATAGCTCCATTTGGACAGACGTTTATA<br/> CATTTTAAACAGAGTTTGCATTTCTTTTTATCAATTGCATAAGGAAGTTTGTGTTTACAATCCCAGCTTTATAATCAACTGG<br/> AACTATTAAGATTTAACAAAATCCTTTCCCTGCCTGAGCTATAGCATTTGTTACTAAGCTATCTGCAATGCCATTAACAACCT<br/> TAGCAACGGTATTTCCAGTAGCTGGTGGAGCAAATTAATAATCATACTTTCCCTAAGCTCAATCTTCCAGTGATTGTGATGAGT<br/> AAGGATGTTCTAAAAA AAAAAAAAAAAAAAAAAAAAAA</p>                                                                                                             |
| <p>ERCC-00054</p> | <p>GGGAATTCGATAAAAATTGGTTTTGCCTTTCAGCAATTCAACTTAATTCCTTTATTAAGTGCCTTAGAAAATGTTGAACTTCCA<br/> CTGATTTTTTAAATATAGGGGAGCAATGAGCGGAGAAGAGAGGAGGAAGAGAGCTTTAGAATGCTTAAAGATGGCAGAGTTGGA<br/> GGAGAGATTTGCCAATCACAACCAAATCAGTTGAGTGGAGGGCAACAACAGAGAGTTGCTATAGCGAGGGCTTTGGCAAACA<br/> ACCCACCAAAAAAAAAAAAAAAAAAAAAAAAAAAAAA</p>                                                                                                                                                                                                                                                                                                                                                                                                                                                                                                                                                                                                                                                                                                                                                                                                                                                                                                                                                   |
| <p>ERCC-00057</p> | <p>GGGAATTCGAGCTCCTAGTGCATCCTCGTGGCATCATGCGTCTCCTCAGTAGGTCTGCGACTGATCCTAGTGCAATGCGTCTG<br/> AGCCTGAGCTACAGCGATATAGCCTGGATTGTGAGCGTATTTGCTGTGAGAACCTCAGCTCATCATGTATGATGCTGTACCAT<br/> CCTGCGATACTGAAGATGCACCGCTATAATGCGAGGCTCTCCGCTAAAGTGGAAAGCTGCTCGTTCTCAATGCGAGCGAGTCGA<br/> ATCCAATGCCGTAGCTGCGATAACGATGCCGTGACTCTACGGTAATGCACGATCCTCTACATTGATAGCAGATAGTCTAACG<br/> GGATAGCATAAGTGCAAGGCTCCTAGCATGTAGTACAGGTGCTCAGATATAGTCATCGCTGCAATCAGCTAGTCATCTTGTC<br/> AGGATGCTACTCACTGCGTGCAGAAGATTGCGCAGACTTCAGAGGATGGCACTCGTCATTAGAGTGATGTTCTCGGATCGACA<br/> CTGCTGGTCTGCGAATGACTCGCATTCACTAACATGGAGCATCGTTATCTAAAGGGGATGCACGTTATCGTCGAGTGGCCGTC<br/> ATGCTATGCAGTGGCGCTATGTCTCATTAGCGAGTCGTATGTATCATGTCGGGCTCGAATGTTGCACACGTCTGCGTAATG<br/> GTGACCGCTAGTCCCACATGGTGCTTCGTAGCCACAAATGTGCTTAGGTAGACCGACGTTATCGCGCTATACCCGATGTCAAC<br/> GCGAGTTAGACCGTATCGTCCCCAGTGCCCTAAGATGGTCAAGCGTGCTCCTACGTTAGTATCAGTTTCCCTATTGGTACGTC<br/> TGGCGTACTTCTGAAACGTGATGGGCGGCTGGTTACCCGTATATGGGCTCGGTTGACCTCTATTGGGCGTTGTTGACCCGAAT<br/> TCGGTATCCTCGTCTGTTAAATGGCGAACGTCTGTCTGATAGGCAAACGTCTGTGGTTCATGGCAAATGTTACTCGTGTGTGC<br/> AAGAAATTACTCGTGTCAAAAAAAAAAAAAAAAAAAAAA</p>                                                                                                                    |
| <p>ERCC-00058</p> | <p>GGGAATTCGGGAGAGTAGGGCCCACTTGTCGATTGTTTTGACTAAACATGGAGAAAGCATCCGAGGGTGGGCAGATCCGCCTA<br/> AGCAAGGTACCATTTAATCCCGTCCCACGAAAGAGTTAACCTATACGCTCAGATGGCGCCATGGTGCCTTCGGAGCCACTTT<br/> CTGCGAATTGTCCACCCTGCCCCTCTCGTGTGATGATCAACATACTATCTTCTGCGGAGACCACCCTCACGTGTGTAGGTGA<br/> GCCATGTTGAATCCATCAGGCACCCGTCCCGGCGTATGAGCGTCTGGAGGCTCACCAACAAAACCTTACATAAGACCGGAACCTC<br/> GAGAGTCTGGCATCATCGTGAACAGAGGCACGAGAGTGAGCTGTGAGTCTGACTGAGCATGTCTCGAAAACCTGTGATAGATT<br/> AAGCCATGGACCAAGGACCAAGAGATCGACGGGCTTGATATTGCCGCAAGGCTGAAGGTAACACCTTCAGCTTCAAATGCT<br/> TGAATACTCAGCCGTCCATCACTTCGACCGGGTTAAGCTAAGATCTGGTGGCGGTAGCCCGTCAAACGAATTGGCATCGGAC<br/> AAGACAAATCAACCAAGAATCTACGGTTGCCATGCCATGGTCTGCGTAACGACACCCGAGGTCTTTTTTATGGCGCCAGGCA<br/> TCGACGCTGTAAAACCTTCCGTTGTCTGAGCAGGTTATAACGACATCAAGCGACAGCGACAAAGAAGCGGGAAAACCTGTG<br/> GACTCCCGGCTATGTCAAATACGCTGAGTCACCCAACAGAAACGTTATCCGCTTGGCAAACGAATACATGGAAAGTGGGGCCG<br/> GTCGGATCACCAAGATAAGTGGTGTACGAATAGCCCTCGCTTGTCTAATCATGGGATGGTACATCGTCATTGCTATTGGAT<br/> GCAAGACGAATCCTGGCAACAGCCCTCCGGACTCAGTAGGTCCATGGATTTAACTACAACAGGAAGCCGGTCAACTGTGGAAG<br/> ACTACCAGTATTCGAGCTGGATAAAGAGGCTCGGCACCATGGTATAGATGTAATAGGAACCATGAAACTCCCATGTCGCAAGC<br/> ACTAACAGAGCTGTAACCTCCCTCCATTAGCGGTAATCGGGAAAAAAAAAAAAAAAAAAAAAAAAAAAAA</p> |

Table S11

|                   |                                                                                                                                                                                                                                                                                                                                                                                                                                                                                                                                                                                                                                                                                                                                                                                                                                                                                                                                                                                                                                                                                                                                                                                                                                                                      |
|-------------------|----------------------------------------------------------------------------------------------------------------------------------------------------------------------------------------------------------------------------------------------------------------------------------------------------------------------------------------------------------------------------------------------------------------------------------------------------------------------------------------------------------------------------------------------------------------------------------------------------------------------------------------------------------------------------------------------------------------------------------------------------------------------------------------------------------------------------------------------------------------------------------------------------------------------------------------------------------------------------------------------------------------------------------------------------------------------------------------------------------------------------------------------------------------------------------------------------------------------------------------------------------------------|
| <p>ERCC-00059</p> | <p>GGGAATTCATTTGATCGTAACTCGGGTGACCAATGACCATATACGGCGTATTAAGGTCGTACCCTCGGTCTCAACTTGTTCGTA<br/> TGGGACTTTCAAGTACCTTAGCTCGTTCGGACGCTTTAGATGACTTATCCATAGTCCTAAGTCCGGCGCCGGTTAAGCCGCTAT<br/> TAGCGTGTGTGGACTCTCTCTAGGAGCGGCTTCGCACAAATTACTGCTCAATCCTAGATACGTTGCGCTCTTTGGTAAACGGC<br/> TCAGATCTTAGCACTCGTGCAGTTCTACGATGGCAAGTCGTGCCTCGTTCTCGTGTAGAATATCAGCTAATAGGGTCGGCTCA<br/> ACAGTGTATCCGGTGGACAAGCACTGACACGCGATGACGTTTCGTCAAGAGTCGCATAATCTCAGAATCCGTACAGCCGCATCG<br/> GGTTCACGGCTATAAAACAGCGTCATCAGCGTAGGGTATCGCTTCGCGTGTGCATGACTTGGGCCACGTCTCTTTCTCGCACAT<br/> TAGGCTAGATTAATAAAAAAAAAAAAAAAAAAAAAAAAAA</p>                                                                                                                                                                                                                                                                                                                                                                                                                                                                                                                                                                                                                                                            |
| <p>ERCC-00060</p> | <p>GGGAATTCATCGACAATAAACAAAGAAATAGAACTTTTAAACACCAGAAGGAAAAATATTTTTGAAGAAAATTGGTTATGTTGA<br/> TTACTATGAGGCAGGTAGTTTAAAATTAGCTGAAGAAACAGCAAAAAGAGATGAGGACGTTATTATATTAATAAAATCATGGAG<br/> TAGTTTGTAGGTAAGATTTGATAGATGCATATATAAAAGTGGAGGTTTTAGAAGAACAAGCTAAACTTACACTTTTAAAC<br/> CTTCTGTAAAGAAATAGTGGGGATTTTTAAATTTATTTAACTCTTCTAATTCATAACAATACTCCAATTTGTGTTCTTG<br/> TGTGAAGTGGCATGTTTGGGTGCTAATCTCATCTAAGATGTGGATTGCTGTTGCACTTCTAACGATTGGCTCCTCCCC<br/> TCTTTTAAACAGCTTCTTTAGCCTTTTCAGCAGCAGCTCTAATGTTTCTTGAACGGTGTATCGTTAATTATCTCATCCAA<br/> ATCAAAGCAAAAAAAAAAAAAAAAAAAAAAAAAA</p>                                                                                                                                                                                                                                                                                                                                                                                                                                                                                                                                                                                                                                                                                   |
| <p>ERCC-00061</p> | <p>GGGAATTCGGAGAAGCTTGGCAAACACTACCGGGCATAGATAAAGACGCGGGGCCAAGCATGCCGACATTGGGATACTTCCAT<br/> GTTACGGGGCATGGAGGCGCAGCTATCCCACCCTCGTGCACAAGATGGACAACCGAGCGCGGTAGTAATCGCGAAGTCCAGG<br/> CACTTATTGTAGAGGTGAATCGCTAACTAAGTTCGGTGTAAAGTTTCCGTCGATGAACAGGCATCGGAGAGGGCTCTACGGGCCA<br/> CCCAGTAGTGACGTCAGGAGTGCATAAGGAAGCAGATTGACCGTGGCGCAGACTCGCGATATGAATAAGACTCTAGGGGGTGT<br/> ACAATTGATCGTTGCGTACGGAAATCGTGCAGCCTCAAAAAGTTAAGCGCGAGGGTACCTTGCTCCGCGCGAGCAGCCTTTGTC<br/> CAGGCCTAGTCTTGCATTGACCTATCGCACCGAGCGTCTCACCCAGCTAGTACGAAATTAAGTATAGAGATGGTTAACCC<br/> CCTCAGAGCGACTGGTTTTAAGTCTAGGACCGGACAAACGGTACGATTACGTCTTAGCATCAAGTGGTGCCTGATCTCGTGATA<br/> GACAACGTGAGAGTATTTGGATGTATGGCTAGTTACGCAGAGCATGTGGCATTATTCTCATGTTTTGCGGCGGAGCGACTCAA<br/> TTTATCCGAACCATGGGAGATCGTCATTCTTGTGGTGCAAAAAAATCACGGGCCCTGATACTGGTGAAGTTGCGCCCTATGC<br/> TTACACGGCGCACGCCGCGGTGGAGCGATCGAGACCTCTCGGATCTGAAATAAACCCGCAACGTGAGGTAGTGTACGCATAC<br/> ATTCGCCACGCTAACTGATGCGTTGATTTCTCGGAGTCTTTACCATGAGAATTGGCATATGGAAATCCTGTCATACCACGG<br/> GTCGATACTTGTCTCCGTCTGAAGCGAACCAAGCATGTTGACCGTCTAAGATGATTTTTCCGACAGAGTGACGCATATA<br/> ACACCTCTGGTCTTACAATGATTCGAAGACACGTGAGACGCACTAGAGGCTAACCTGGCAGATTGTGATCTCCGATGGTAAT<br/> GAAGTCGCCGTACTATCTTACTTGCATGACGCGACTACCAAAAAAAAAAAAAAAAAAAAAAAAAA</p> |
| <p>ERCC-00062</p> | <p>GGGAATTCACTATTGGAGAGAAAAGATATCAGCCAGACCTATTTAGTAGCTCCACAGGCGCTAATAAAAAGAGGCAGTATCATTA<br/> ATTGGAAAGAGTGCTGTTGAGGGGATGATTAGAAGAAGTTCAAATAAATATTCAAATAATCATAATAAAGTAATACCTTATAC<br/> TGAATATTCGAAATTATTATTTTGAATTTTACAATATAGGTGATATTATGGCATTAAAATTCACCATTGAAGAGTTATCAAA<br/> TCAAAAAAGAGATACATTAGGAAGAAATATTGACGTAAGTGTTTTTAGATTAATAAGATTTATGGATTTGGAAAGATATTTAG<br/> GAAGAGGGGCTCATGGAGTTATTTACGAATGTGGAAGAGAGCTTGGACTGGCATTAAATCCAAAACTATTGAAGATGTAGTT<br/> AAGTTTTGTGAGGAATATAAAATTTGGAAAGGTGGAGATAGTTAATAAAGAGCCATTGTAATTTAGGGTTTTATGAATGTATCTC<br/> TTGTTCTGGACTTCTGAGGTTGGAGAGACATTATGTTGGTTTTGAAGGAGGCTTTATGCTGGATGCTTAGAAAAAATATTA<br/> ACAAGAGAGTTAGAGTGAAGAAACTCACTGTGCAGGTTTGGGGCATGATTTCTGTGAGTTTGGAGTAAAGTCTTTAATGA<br/> TATTTTTTCTATCTATTTATATATATTCTAAAGCTTCAAAACCCTCTTTTCTATGTCTTGCAAAAACGGCTATTGAAGCAAT<br/> CCTCTCCCCAATACTTAAAAATCCAGTGTGTTGGTAAAAAAGATATCAATAACATCAAACCTATTTTTTTGCTCCTCAATAA<br/> CTAACTTCAACTTTTCTAAGATGTCTTCATCTATCTTCATTCCTTTTTGATGGAACTTTTTCTCCATCTTTTAAATCATACTCC<br/> CTAACAAATCCATTGAAAGTTACAATACATCCAAATTTCCCTTTGTATTTTTCAATACATTCATCCATCTTTTTGAAAACCTCT<br/> TCATACTCGTTAAAAAAAAAAAAAAAAAAAAAAAAA</p>                                                                                                                 |
| <p>ERCC-00067</p> | <p>GGGAATTCGCCGTAATTACACCCTACGTTGCTGATCTCGGGCGCTCGTACATTTACACTTGTAGTTGAAGGTCGGGCGATGAGG<br/> CGTTCGTTTGGCCAACCTCGTTACATTGCACAAATGCCGGATTTGGCTACTATATATACTCCCTGATCAAGGGTCGAGTTGTC<br/> TGTGCATTAGCTCGGAGCTAATGAGCACGTCGGTCACGGACACTGCGAAGCACGACGAAATGGCTCTCATTGCGATTGTGGCC<br/> CTTGTGTCAGACAATGTGTCAGGCGGGACGGGCCAGGAATGACAATAGAACATTAATCTAATTTACAATTTGACGCCATGACGT<br/> ATTAACATTCGGGCATGCAAAATCACCGATTTAAGATCCCCTGTACGGCTGCGTCCACACTAGCATGATGTAATCGATTTG<br/> GCGGTGACCGCTGATCCTTAACAAAAGGGGGTGGTTCAAATGTAACAAGTAGGTGCGAGCAAACGTCTGGTGTCTAATGG<br/> CAAACATCTGCAATCAGCGAACCTCGCGGTATGGCAACTACTAATTGTCGGTGCAGACGAAATACCGAGGGAGGCACTTA<br/> TGAGTTATCTTCGCTGTGATATCTCTTCGACTAGCGGGTCAAGTCCAAAAAAAAAAAAAAAAAAAAAAAAA</p>                                                                                                                                                                                                                                                                                                                                                                                                                                                                                                                                              |

Table S11

|                   |                                                                                                                                                                                                                                                                                                                                                                                                                                                                                                                                                                                                                                                                                                                                                                                                                                                                                                                                                                                                                                                                                                                                                                                                                                                                                 |
|-------------------|---------------------------------------------------------------------------------------------------------------------------------------------------------------------------------------------------------------------------------------------------------------------------------------------------------------------------------------------------------------------------------------------------------------------------------------------------------------------------------------------------------------------------------------------------------------------------------------------------------------------------------------------------------------------------------------------------------------------------------------------------------------------------------------------------------------------------------------------------------------------------------------------------------------------------------------------------------------------------------------------------------------------------------------------------------------------------------------------------------------------------------------------------------------------------------------------------------------------------------------------------------------------------------|
| <p>ERCC-00069</p> | <p>GGGAATTCGGGAGAAGTACCAATATCAGACTCCCGAGACATAAGGGGTGTGCACGGCATGGATGTGTCGCTAACCTCCTGGTC<br/> CTATAAAGCAACACTCATGGCACCGTGTGCTGAAGGCTCCAAACGGGTCGATACCAGAAGGGTCGATTCTTTCTTCCAATACA<br/> TTGTCGGTGTCAATGCTGGAGGCCAGGAGACGAAATCCTCGGTCAGGTTGTTACTTGAAGGGTTCAACACGAGCTCAAATTT<br/> GTCCAGGGGTGGTCACCAGCGGGTCTCGAACAGAGGTGAAACGGGATAAATACCCGAAACATTCATAACCCTGCCAGTCATTA<br/> TAAGCAAGCCGCTGACTTGGACACCACAACGTGTGGAACCTCAGGTAAGCTGGTCCGGGAATCTTGGTCGCGAAGCGACCCCA<br/> TTGAGTAGGCAATCCAAACCCTGCAAACAATAGGTGGCCATCCGGTCAAATAATGTGGGAGATGCGCACATCATGAGAGCGAC<br/> GTATTGAACTCAAGGGACGGTGGTCCCAGGAGAGGGATTACCACATGTTGAAGCTCTTTCAAATCGATTATCCCAATCTGCGC<br/> ACTGTAAGGTAACCAACCGCAATAATCCCCAGAACACTGCCCTGGTATCTATCGATTGGAAGTCCAGACTCTAGTGATGCCG<br/> GCTGGTCGCGACAAGAAAACATAATTCGCAAAGGGCCCTGTCTCATTTGGCGTCTTGTACCCAAAACACCATACTGGGAGGG<br/> TGTTGCGGCCGCATATCAACGACTAGAGGCCGTGAGAATGAGTCTTCAACACATATCGCTGAAGAAATGTCACTCCCATGGTG<br/> GCTGATATAGAAACATATCCTCGCGGACTTCATCGCCGGGCACAAGGCTACAAGATGGACTGGAACGCCGTGTCAACCTCGTA<br/> ACAACCTCCCATGCAATTCACTCACCGAGTAGCCTATAATGGGAATGTAGACGGGGCCCTATCTCAAATGTGTGCACCTCTA<br/> TCCCCACCAAGTATAGTCGACTTAAGGGCGGATCAAATGGCGCGCTGCCATACAAATCCGGTTCCAAGCATGACTCATGGGCA<br/> GTACGCCGGTTAGTGGGAAATACGGCTGTCAAACGCTGGTCCAAAAAAAAAAAAAAAAAAAAAAAAAAAAA</p> |
| <p>ERCC-00071</p> | <p>GGGAATTCATGCGAGAGGCCCTTGAGCCGTTGGCCGATCGCATAACAGAGACTATTGCATCAAGGTAACACTTATTAATCCCCA<br/> TCGTCATAATCGCTAGATTCTAGGTATTTCCGATCTTCCTAGTTATCAGAAACATGTTAATTGGGCTCGGGCGTCTGCGCCAG<br/> GCCTTCGTAGTCCATACCACGATCTGTATTTGACCTTTCGCTATGCTGAGGTTGTTGACATAAGGATTAACCTGCTGTGGTG<br/> TGTCATACTCGGCTACCTCCTGGTTTGGCGTCAAACAACCTCCAAGATTATCTCATACTATAAAAAGACGACATGCACCGCCG<br/> TCCTTAAGTGCTTACGACAGAGGGTTCGTTATCTCTCTCGGTCTCGGTGCGCCTCTTACGGAGCAGCATGACCTGCTAACCTG<br/> CATCAGCCAATGTCCCGTCTCGAGCTGGCCTACGGATGCGTGAGCAAAGGTGCTAACTCTTTTCATAACCCGGAGATGAACTA<br/> CCACGCTTCCGTGCGTGGGTCCCGCGAAAACGAAGCAAGGAGATTCTTCGCGACCTGGCCATTCACTACATAACAGAGTTAAG<br/> ACTTAGATCAGCGAGCAGGTGTACGCCCCGACCTTGGGCTACTTAAAAAAAAAAAAAAAAAAAAAAAAAAAAA</p>                                                                                                                                                                                                                                                                                                                                                                                                                                                                                                                                                 |
| <p>ERCC-00073</p> | <p>GGGAATTCGTGATAATTTGACGAGGCGTTACATATTCTGAGAGGGGTGATTAAGTCTGCTTCGGCCTGGGATGGTCTGTCT<br/> ACGTGTGCGTAGTTCTGTGCATAGCGTCGAGGATTCTGAACCTGTCCATAGTATCCTGTAAGCGTCCAATGTACCTATATCGTG<br/> GACCCAAAGTCGATACGTCCGATTAAGCGACGTTGGTCTAGGTAACGAATTATACCCCTCGGGTTACGAATTATGGCTGTGCC<br/> AACGAATCTGGGACGTGCCTAAGTAATCTGGTCCGCGACTAAGATGTACGGTGATCGTGGACGCTTGACCGGACTTATGCGTC<br/> GCCTTCCGAGTTATTGGATGGCGTTCCGTCTATTGGATACTATTCCGTGCGTGTGCGACACGTTCCGAGCATATGCTAACAG<br/> TTCCGTCACTATGTAACGCTTGACGTAGATTGCTATCAGGTTACGATGACTGCTAAGCCATTACGCGACATTCTGCAAAGTTA<br/> CGTCGCATTCTCTCACGTTACGGCTGATTCTCTAGGCTTACGCGCATGAGCTCTAGGTTCCGGGTACTATCGAACGTGTCATT<br/> GGTACTAAAAAAAAAAAAAAAAAAAAAAAAAAAAA</p>                                                                                                                                                                                                                                                                                                                                                                                                                                                                                                                                                                                         |
| <p>ERCC-00074</p> | <p>GGGAATTCGGACATTAATTAGGGCTGAAAGCCCTAACTTAATGGACGGGAGGTATCCCAATAGGAGGTTTCTCCTATGGTT<br/> TTCAAACAATCACCATCATGCTATTAATGATATTAATAATCCCAACTATACCAAAGAATATCCCAATTATCCATAAACTGTA<br/> ACTAAGTGAGGCTCTCTCATTGGTTTATACTTCAATATAAGCCTTGGTAGGGATAGATAGCCACCTATATAGTATAGCTTCCC<br/> ATCTTCTTTGAGAGTTGTTGGTTTATGCTCATCCCTACTCATAACCCCAGCACTTAGATATTTTAAAGAGGCATCTATCACAT<br/> AAGGCATCATTATAACTAAAAATGGGATATATTCCTTATAAACTACTGCTAAGACAGCTAAGAAAGCTCCAATTGGTAGAGTT<br/> CCAACATCTCCTGAAAAACCTTTGCTGGATATTTGTTAAATATCAATAGCCCTAAATAGGATGCAGAGAATATCAAAGCGGA<br/> AAAAATCCAAAAAAAAAAAAAAAAAAAAAAAAAAAAA</p>                                                                                                                                                                                                                                                                                                                                                                                                                                                                                                                                                                                                                                                                                  |

Table S11

|                   |                                                                                                                                                                                                                                                                                                                                                                                                                                                                                                                                                                                                                                                                                                                                                                                                                                                                                                                                                                                                                                                                                                                                        |
|-------------------|----------------------------------------------------------------------------------------------------------------------------------------------------------------------------------------------------------------------------------------------------------------------------------------------------------------------------------------------------------------------------------------------------------------------------------------------------------------------------------------------------------------------------------------------------------------------------------------------------------------------------------------------------------------------------------------------------------------------------------------------------------------------------------------------------------------------------------------------------------------------------------------------------------------------------------------------------------------------------------------------------------------------------------------------------------------------------------------------------------------------------------------|
| <p>ERCC-00075</p> | <p>GGGAATTCTCCTACACGTTCCCTCATCTGAAACCATACAACCTACCAACTGGATTTAATGGAGTGCAAACCGTTCCAAACAATG<br/> GGCAGTCAGTTGGCAGTTTCTCTCCTCTCAAAATCTTATCACATATAACAACCTTTAGGAATTTTCTCTTTAATCTCTGGAATA<br/> TCCTCATGCTCATAGATGTCAAATTTCTTATACTTCTCCCTCAATCCAAAACCACCATTTTTAACAACCTGGGAAACCTCTCCA<br/> AGGAACATCTATGCTTTCAAAAACCTTCATTTATTATTTTTTGAGCTAAAACATTACCTTCTGGCTTAACTGCTCTAATATATT<br/> CATTTTCAACCTTTGCCTCTCCACTGATGACTTGCTTTAAAATCATTATTATAGCCATTAACACATCTATTGGCTCAAAGCCA<br/> GCAACAACCATTTGGAGCTTTGTATTTTTTACACAACCCATAATAAGGCTTTAATCCGGTGATTGTTGAAACATGTCTGGGCA<br/> TATAAATGCATCTAAATAAACTCCCTCATTTAACAAGAACTCCATAACTGGAGGAGTCTGCCTGTGGCAATTTAGGATAAAGA<br/> AGTTATTAACATCTTTATTTTTTAAACTTATTAGTTTACGCCCCAGTAGTTGGAGCAGTGGTTTCAAGACCTATTGCCACAAAA<br/> ACAACTTCTTATCTCTCTCTCTTCTTAGCCATCTTTACTGCTTCACTTATACTATAGACAATTCTAACATCACAACCTCAGA<br/> TTGCTTTTCCATCAAAGATTTTTTCACTTCCCGGCACTCTATACATATCTCCAAGAGTGGTTATTACATATCCATTGTCAGCTA<br/> AATATATGGCTGTATCTATCTTTTTTGGAGTTGTTACACAAACTGGACAACCCGGCCCTGGAACAACGGTTATATTCTCTGGC<br/> AGAACATCCCTAATCCATACTTACAGATCGTGTGCTCATGACTTCCACAGACGTGCATAATCTTTAATTTATCTTCTTCTCA<br/> GCAAGTTTGTAAAAA</p> |
| <p>ERCC-00076</p> | <p>GGGAATTCCTCCTCATGTGAGCGGATCACTATCTACAGCTGGTAATACTCTCAGAATTTCTAACTACCAGTCGTAAAGTAGGC<br/> GAGCGTTGGTTGGTTCCCTCTTGAAGCGAGAGAACCAAGGTGCTGGCTATTGTCCGCCCGTCTACGGCTAACGCGGGGTTCTG<br/> CCATCCCGGTTTAGCGCAGAATAGTATTAGTCGGTCAGTGGACCCCTCCTGAATATCTATACTTAGCGGCGGATTACCCGGC<br/> CCTCTTCATTGTGCGAAAGATTGGGAACCGCCTCTGGCTGTCACGCCCCAGGCCCTAGGTGAGGTAATGTGAGGATTTTTT<br/> TCAATGTTAGATCATCTATGTAGTGGATCTGAGAGATCACGTGGACCAAAGCTGATTGATTACGGGACTGGCCGTAAGTGCTG<br/> CCCGGAGTAGATCGTCTAGATCCGGCTAAAATTCCCTGCGGTGCCTTAGCCACCCTCCTACGACGGGCGCATCTTGGTTA<br/> TTCTCGCTAGACACGGTTCCGGAAGTGGAGCATCGTTAGCTGCCAAGATGTGTATGTTGTGCCACTCTCGCACCGTTTTTAT<br/> AGTCGTTCTATTAGAGATGGTTGCACATGGGCGTTTCTCATCGGTAAAAA</p>                                                                                                                                                                                                                                                                                                                                                                                                                                      |
| <p>ERCC-00077</p> | <p>GGGAATTCAGTTTTTTCACCTTATGACTTCTCACTCCATACGAAAGACAGATGGTTTGCTCCCAATGAACCCAGAGGGAGTTA<br/> AGGTTGATGATTCCCAAGTCCAACATGGAGTTATGCCTATAACGTGATGTTGGACAGACCCCTGTATTGAGCAGACTTAACTT<br/> ATACTGATATACAGCTAAAATTTGAACAACAAATCTCTTAAATTTATTGTTGAGAATAAAAAGGATACTATCTTATCCAATAT<br/> TGTATTTCCAAAAA</p>                                                                                                                                                                                                                                                                                                                                                                                                                                                                                                                                                                                                                                                                                                                                                                                                                                       |
| <p>ERCC-00078</p> | <p>GGGAATTCGGGGAATTGGATTTGCAGAGCATATTAGCAAGTTAACGCCGATCACTCTCCGGCAGTTGCTCCATTAAATACGGG<br/> CCTTCGCAATCGCGTGTGTTACACATAATGCCGGTATCCATCTACTATCGCCGCCAGGTGCAAGAAATGCATATCCCGGCCCT<br/> ACCCCTTAGCAATCGACATTTGTCTTTGCTGGACGCGCATGATTGAGTTATACGGAACTTCGCAAAAGTATTCCCTTTGTGG<br/> TCCGTGCGCCATGCTCCTCTGGGCGTAGCTTACAAGGACTAGGCCGTAGCCTGTAATTAGGGAACCGAGCACCAGAGAATCAG<br/> GGTCACAGTGTGTGGTAGACGAAATGATCGTGGGCTGAGGGAATTAGGAGGCGCCGGTCCAATAGTCGATAACACCTGACGGA<br/> AGTACGGCTGCAGGATCTAATCATATAGTTCAGAATTGCACGCGCTAAGAACGGACAGTGTAGACACAATAACAATTAA<br/> GCGCAGATCTGAGAGAGGGGTGCACAATCCAGGCAAAGTCCGTTAGAAGTCAACCTTGTGGGTGCAGCGCTTTGCTCCTAAA<br/> GATTCGCTCCTCGGGAGCGACGCGACTGCTAGGGACTGGTAAAACGTTGGGCGCTGTCCAAGGTACCCTCAGTCTGTATTTCA<br/> TGCCCTCAAATATGCAATCCCGACCCGGAGCCGGCTTTAGATTTATAGCAGAGGGTCTCCGAGGACTGTAATGCTTTTGCGA<br/> GACAGGAAAGGTTGGGCGGTGTACGTACCTCTACGGTTCGAGGCTTGGGTGTATCATGGAGTAATCTATATTCTTACACGCT<br/> TGCTTGCTCCTACCATAACAACCACGAGTCATTACGCGTACATATACCAGCAATTTCTTCTACGGACCGTTAGGAAGAAAATGA<br/> ACGGAGTGGCTGGCCATAATTTGCACCCGAAGCTACTGGTTCGGACCCATCAGCGCGTGTGTAATAA</p>                                                 |
| <p>ERCC-00079</p> | <p>GGGAATTCGATGTTGGAGTTAACGGAGACCCGCCATCGTTTACGAAACAGGTCGCAGATAAATGTGGAGCAGATTTACGTTGA<br/> GGGCCTTCTGGGGACCCAAAGGATGAACGGGGTGTGTTTTCAGAGCGAATAGAGCGATCACCACGCGCACGTCTTTTTTAA<br/> GATTGAGCGGCTAGGTGTTTCTACAGTAACTCAATTAGCGTGAGCCAAAGGGCGGAGCCACGGCCAGTAAGCTATTTAGGG<br/> TTTACATGGCTCGATACCGAAACGTGACCGGTACGACGTTCAATTTCTCTGCTTTGGAGTTATCAATTCGTGACCCCGATCAT<br/> CCAGTCCAGAAGTCGCGGCCCGAAGATCAAAGACGCTACTGACTTGGACTGGTACGAGAGCCCGAGAGTTTAGTGTGCGCACC<br/> CCACGTATTTTTTTCGCGTGCATCATGCTTAGATTTTAAACAACCCGCGGGCCGAAGTTTGATAAGCGTGTCTAGATTGGAAC<br/> TACCCTGTTAAATACACGACGCCATCTCCAATCGCACGCAACAGGGGGCTTCCACCAGATACTCCCGAGGACAGGTGGAG<br/> ATACCAACCACGAAGGAGGTCTCGTGCTGAGCCTTCGTGCATATACCAAAAAA</p>                                                                                                                                                                                                                                                                                                                                                                                                                                   |

Table S11

|                   |                                                                                                                                                                                                                                                                                                                                                                                                                                                                                                                                                                                                                                                                                                                                                                                                                                                                                                                                                                                                                                                                                                                                                           |
|-------------------|-----------------------------------------------------------------------------------------------------------------------------------------------------------------------------------------------------------------------------------------------------------------------------------------------------------------------------------------------------------------------------------------------------------------------------------------------------------------------------------------------------------------------------------------------------------------------------------------------------------------------------------------------------------------------------------------------------------------------------------------------------------------------------------------------------------------------------------------------------------------------------------------------------------------------------------------------------------------------------------------------------------------------------------------------------------------------------------------------------------------------------------------------------------|
| <p>ERCC-00081</p> | <p>GGGAATTCTTTATGCGGGGTGTTGTTGATAAGACTTCCTAGGCACGCGGACCAAGCACGTTAAAGGGAGGTTTCGCTCGATCAA<br/> GAGATCCATACAGCAGGCTCCTATCAGTCTATCTGACGCCAGTTGCCATTGGACGGGATGTCGAGGGTTTTCGGGTGGGGAACG<br/> ACCATACTTACTGTCATTACGACGTGCGGGAAATTGAGGTTAAGTTGTTTGCACCCTACAATAACGAAGAATTTAGCCACC<br/> AGTTGGCGTTAGAGTTGTCAAGACGTTGGCGTGATGGGATGAACGTCGCTTAAACGTTGGTTCAGGGCTCCATATATACATCT<br/> GCCGTGCCCCCTTAATCTCCATACAGACCCCCAGGCGGAATGATAAGTCGATACCAGGACAATGACGGCTTCAACGTTTTTC<br/> ACTTCCGCAGGTGGCGACCCTCTAGTTGCACGCTGGTACATCAGACACGTACACACGCGCAGTGGGGTGTAAATCAAGCAGGA<br/> CCATAACTGATAGTTACCAAAAAAAAAAAAAAAAAAAAAAAAAA</p>                                                                                                                                                                                                                                                                                                                                                                                                                                                                                                                                                  |
| <p>ERCC-00083</p> | <p>GGGAATTCGAGCTCGAGTTTATAGTCTTTTTTTGATTGCCTCAACTAATGCCTCCTTTGTAGGAGCTCCAATAAACTCAACAT<br/> CCCCATTTATTACAATTGTTGGAAGTCCATTATCCCATATCCATTGCCTTTTGGAGGATTCTCCATAACGTTTATGTATTCT<br/> ACTTCAACAGCATCCGGCATTTCATTTGCTACCTCTTCAACAACCTCTTTTAGCTGCAGGACAGTGAGGACACATTTGGTGATGT<br/> AAAAAGCTCTATCTTTACCTTTGACATACTAACACCTTAAAAACCTCTTAAGTTTATAATAAAAAATTTTATCCAAATTTTTAT<br/> AAATAGTTTTCCAAAAATAGAATATTAATTTATAGGCTAAAAATTAATGACCACATGTCCAAACTTGTCTGAAGTGTTCATTT<br/> GCTTCAACAATATCCTTCAATTTCTCTGGTGGGAAAGCTACAACAACCTTCTTCTGGCTTAATTCCAGCGTATTTTCTTGAACC<br/> GTTACAACCTAAAGTCATGTTAGGAGCTTTTCTTGTATAAACTGCCGCTACAGCATCAGCACACAATGACTGAATTCCTGAGA<br/> AATCTGCCTGGAATCTTCCACCTTTATGGTAGAGTATTGCTTGAACCTCAACGCATATAATGGCTCTCCAATAAATACA<br/> ATTGAGTCTGGAATGAAGTCGGTTTTATCTAATGGAGCATAGACTGTTGCATAAATTTCTTCAACTTTTTGGTATTGCATC<br/> AACTGTTTTTTTTAGCTGCCTCTTCTAATTTAAAGTTTCTAATTTGACATATAATTTTCTGTTGCTAATGGTTCTGGTGGGT<br/> TTCTAAAGACCCCCATTGCATAAGCTCCTCCCTTACAGAGGTGTTTATCAACTGTTGCATATAATTTTTTTCTTTCTAATCTT<br/> GCCATTTAAATCATTTACAGTGTCTTTTTTCTTCTGCTAATGTTTTCATAGCCTTCTGGAATTTCTTCTTTGATTTGCCAT<br/> TTTACAGCGACAAATGGAAAAAAAAAAAAAAAAAAAAAAAAAAG</p> |
| <p>ERCC-00084</p> | <p>GGGAATTCGCGAATTGTCTGGGGCCTCGTTGTGACTATCCTATTACGGGGATCTCAGGTGTGGTATCCCTGGTTGAGACATTG<br/> GACTAGTGTAAATGACAGTCATCGTATGCGGGATACCTCAAGTTGTATTCGAGGGCTTATCGGTGATACTGTGTAATCCCTTC<br/> GGCGAAAGATGTATGCGTGAGCATTAAATTTACGTGTTTCTTATATCGGACGCCTAATCTTTACCCGAGAAAGATATCTCTGT<br/> AAGTTTTCAAGCAACCGCTCCTAATGTATATAACTTTGGATCATCAGATAGGCCCATTACACTCTTCGGTGCTGCCGATATCC<br/> GACGAGCGGGCTTTTCGACTTGATCAGCGCTGTGGGTAGAGCTTGGATAAGCGAGGTCAGTCAAGCGATTTCGTTGCCTCCGGG<br/> TCCCACGTAGATCGTTTGCCTGCATTTTATAGGTAGTGGCCTGCGTTCGCACTCCGAGGCACTGGGAACGATCCTACCAACAT<br/> AACGGTCGAACTCGGTGTGCGATGACCCGGACGGGACGCCCGCGCTCACACAGGTATCTGGCGTGTACACCCGAATCGGCGGG<br/> GCTCGGCGACACAAAATGCTTCTAAGTCTGCTGTAATCTACTGCAGAATATGGGTTTGTAGCGCGCCGGTATCTACCAGCA<br/> AAACATAGGAGCGTGGCCGAAACTGGGTCACTGAGTGAATATATCCGAGTGCAGCTGCCATTAGTGGGGCGGTATCGGGCGT<br/> GATTGAAGGTAGGCTAACATTAGTCATCTGGTAGGGCATATTTTACAAACGGTCTAGGCTGCGGTTTACAGATAGGGACTGATAT<br/> ACTTGATGTGCCCCGTTCTTCAGCGTGCAGCTATGCAGCGACAGACGTTTGGAGCCTTAATCAAGTACGCATCGGAGCATA<br/> GGTCACTGGGGCATTTGCAGTGAATTAACCATCCCCGTTCCCGCTTCTCAGTTGCAGGGTGGGGAAAAAAAAAAAAAAAAAAAA<br/> AAAAAA</p>                                  |
| <p>ERCC-00085</p> | <p>GGGAATTCGATTCAGCCTGACGTACATAGACGAGATAGGGTAAGCCTATTGCAAACCTCCGCTTTGCTACTACAAGGACCTCG<br/> GAAGTGTGGAGAATCGAACCTACAATTTTCCAGGATCAGCCGGTTATCTCTTGCAATTCCTAAGATGGAGGATAGTTTTGG<br/> AACCCAATATCCCCAGCCTACGTTTTAGGTGCAAGAATAGAGCGTACCAGGCGTCGCCCGCGCCTTATGTAGTCTGTATTGT<br/> TGAATTAGCCTTCTTCAGAGGGCCTAACGCCAGCACAACATGCTTACCTGGCTAATTGACTAAGTGTACGGTACACAACGAC<br/> TACGTACGTAGCACACAGTTGAGGTTATCTCTGAGCGCCCCGTTAGAAGTGGGGCTCAATTATAGTACCTTAACTGCGTTGC<br/> GCTGTCATGGGAAGGTATTTTAAATACGGATTCAATACCGCTCCACCGGCAGCGTTCCGTTACATCCAAGTGGTGGACAAACC<br/> TGCTCATTCAAGGGCGCCTCCATCGCAGGGTTGCAATTTATTTTCTAGCTAGAGGTGTAACCATGCCGGCAGCGAACGTCCGC<br/> ACTAGCAGGTACACAATCAGGCATCGAACATGTAAGTCCGAAATATAAGTCGGATACTTGCCTTAAAGTCGCATCTG<br/> AATCATAGCCGCTCCATTGCCGAGTAGACGGGATCTGCTGTAGAATGGTAATCAGTCTTACCCGTGGGGTCTGTTCTGCCCGAG<br/> TGCTGCATTCGCTACGCGCGGTATTCAACAAGGGTAATCCCTCCGACAACCCTCAGTGTATCATCCGCGTCAAGGGGGAA<br/> AAAAAAAAAAAAAAAAAAAAAA</p>                                                                                                                                                                                                                |

Table S11

|                   |                                                                                                                                                                                                                                                                                                                                                                                                                                                                                                                                                                                                                                                                                                                                                                                                                                                                                                                                                                                                                                                                                                                                                                                                                                                                                                                                                                   |
|-------------------|-------------------------------------------------------------------------------------------------------------------------------------------------------------------------------------------------------------------------------------------------------------------------------------------------------------------------------------------------------------------------------------------------------------------------------------------------------------------------------------------------------------------------------------------------------------------------------------------------------------------------------------------------------------------------------------------------------------------------------------------------------------------------------------------------------------------------------------------------------------------------------------------------------------------------------------------------------------------------------------------------------------------------------------------------------------------------------------------------------------------------------------------------------------------------------------------------------------------------------------------------------------------------------------------------------------------------------------------------------------------|
| <p>ERCC-00086</p> | <p>GGGAATTCGAGCTCTTTCTCTTGACTTTTTCCATAACTTCCCTAATTGTTCTATAATTCTCTTTCAAAGAGTCCTTATCATAA<br/>         CCAAATACATAAACTCTAACTCTATTTCCCTTTTGATTCTATTGTGCAATCAATGTCCATCCTTGATAATCTCTCACAAAGCTC<br/>         CAAAAGCTCTTCATCACAACTCACTTTTTGATGAAATAATCTTTCTCATAGTATCGCCAAAATAATAAAGTAAATTTACAAATT<br/>         ACCATAGCTTATATAATAAAGTTTTGCATGAACAAAAATGTTGTGGTGATATATCATGGACGAATTTGAAATGATAAAGAGAA<br/>         ACACATCTGAAATATCAGCGAGGAAGAGTTAAGAGAGGTTTTAAAAAAGATGAAAAATCTGCTTACATAGGTTTTGAACCA<br/>         AGTGGTAAAATACATTTAGGGCATTATCTCCAAATAAAAAAGATGATTGATTTACAAAATGCTGGATTTGATATAATTATATT<br/>         GTTGGCTGATTTACACGCCTATTTAAACCAGAAAGGAGAGTTGGATGAGATTAGAAAAATAGGAGATTATAACAAAAAAGTTT<br/>         TTGAAGCAATGGGGTTAAAGGCAAAATATGTTTATGGAAGTGAATTCCAGCTTGATAAGGATTATACACTGAATGTCTATAGA<br/>         TTGGCTTTAAAACTACCTTAAAAAGAGCAAGAAGGAGTATGAACTTATAGCAAGAGAGGATGAAAATCCAAAGGTTGCTGA<br/>         AGTTATCTATCCAATAATGCAGGTTAATGATATTATTATTAGGCGTTGATGTTGCAGTTGGAGGGATGGAGCAGAGAAAAA<br/>         TACACATGTTAGCAAGGGAGCTTTTACCAAAAAAGGTTGTTTGTATTACAAACCCTGTCTTAACGGGTTTGGATGGAGAAGGA<br/>         AAGATGAGTTCTTCAAAGGGAATTTTATAGCTGTTGATGACTCTCCAGAAGAGATTAGGGCTAAGATAAAGAAAGCATACGC<br/>         CCAGCTGGAGTTGTTGAAAAAATAAAAAAAAAAAAAAAAAA</p>                                                                                                           |
| <p>ERCC-00092</p> | <p>GGGAATTCAGATGTATATATGATGTCCTTGGACGGGGTGGCGCAGTATTACTGCAAGAGAGCGGACAGATTAGTGTGTTGGAG<br/>         CCGACACATCAAAGGTTCTGTCGGGGACCGATCTGCAGCCTACGGGACATTTATCCGTAAAAGCATGGCGCTGTTTCGTA<br/>         ATCGGAGGCCAGGTATCGTCGCGGCGAGTCTCCCCGACGACGGAGATGGGCGTTACTATCTGGGCGTCTCGTACTCTGTTAC<br/>         TTGGCACAGATGCGAGCCCTCGTAATGTGCATCAGCTAAGGGCGATATTATAATGCGACGTTTGTACGGATTTCGTTACTAACG<br/>         TGTTGGACGCTAGTGAATATGTGTCGTTGGTTAGCCTACCCATGGCTTTCGCGGCGACACATGCTTAGACTCTTTCAA<br/>         TCGGTGAAGTTCACTCAAGCCGCGGAGCGCGTCTGTAATTCCTAGGGATGGCGGTACCCGTGCCCGTCCGATTTCGTAGCAAC<br/>         CTGCATCACGATTTTGTCTTCGGGCGACTTATCAGATACGTAATGTAATACTGTCATTTGGGCACCTCTTTCGTTTAAAGC<br/>         GGGAAAGATCGCGAGGGCCCGCTATTTGCGATACTTCCCATGTCGGTGCCGTCGCCTCTATGTACTCGGAGACGTTAATGCAG<br/>         AGGCTAAGGACAATTTACCATGACTCGGTAATCCGTTTCGTCAGCAGGTAGCTCGAGTCTCCCCACGGACACGTTAGTGGGTTT<br/>         GTAACGATCGATAACCGAGTCTTTTGTCTAGTAGAACCAACCAACCATTAAGGAGTTCCTAGCACATCTTTGCGACCCGATC<br/>         GTCCGTGTGTCGCGTAATACTTTTGTATGACGAGACATACGCTCAAGCCCTGGGTAGCTAGTTCGCGGAGGCACGTTACCGCG<br/>         CACAACCCCTATTCGTTTACATGTACATCGCATCTGAGGTAGTACACTTCCGGCGTACGTGAGTATTTGCGCGTAATAAGCGC<br/>         GTGTTTAGCTGATCCCCTCTCGTATCGAGGTTAAGGCAGATTAGTGCCAGTAATTGCGTTTTTTTTTGTGCTTGTGCGAGAACG<br/>         CGATTTGCTCCGAAAGCTTTAAGCCGTGGAAAAAATAAAAAAAAAAAAAAAAAA</p> |
| <p>ERCC-00095</p> | <p>GGGAATTCGAGCTCTTGATGATGATACTTAACCAAACCTACCCTAATGTAGTCATCTGTCTCCTTCTTCTGTGGATTTAGGA<br/>         ATATCTGCTCTGTCTCTCCAACTCAATTAATTTCCCATTAAGAAAAAGGCAGTGAATCAGAAACCTACTTGCCTGCTGC<br/>         ATGTTGTGGGTAACAACAACAATCGTATAATCTTTAGCTAACTCAACCATTAACCTCTCTATCTTTAATGTGGAGATAGGGTC<br/>         TAAGGCAGATGTTGGTTCATCCGTCAATAAAACCTCTGGCTTAACCGCTATCGCTCTCGCTATAACCTCTGCTGTTGTC<br/>         CTCCAGAGAGAGATAGAGCGTTTTTATGCAGTTCATCTTTAACCTCATCCACAAAGCCGTTTTCTTTAAAGCCCACTCAACA<br/>         ATCTTATCCAATCTTTTTTATCCTTAATTCATGAATCTTGGGCCAAATGCAACATTATCATAGATGCTCATAGCAAAGG<br/>         ATTTGGTTTTGAAATAAAAAAAAAAAAAAAAAA</p>                                                                                                                                                                                                                                                                                                                                                                                                                                                                                                                                                                                                                                                                                                                                  |
| <p>ERCC-00096</p> | <p>GGGAATTCAGATAAAACGAATAGCTCGTAACCAAACATGCACAGCGGTCAAACAGTATGTCCCAAGGGGACTTAAGCGCGGTG<br/>         GCCTCCCCTATCCCCTACGAGGCTACCCGGATCGATGACGCGAATTGGGGACATTCAAATGAGCATCCTAGTCACCGCGTTTA<br/>         AAATGAACCTGCCGGCTGATCGTTTTTTAGGATATTGTGAGTAATATAGATTGGCGCTAGTAGATCACAGAACAACCGCCGCAT<br/>         ACGGCCGATTGTCGCGAGCCCGGGTCGATTATAACAACGGTGCAATCTCAGCTAAACCGACGCAGTTTTGCTCCTTGGATTCTG<br/>         AGCCCGGCATCGCCCTCGTTTTATGAACTAGCCTATCGCAGACGGTATCAACAGGAACATCCTCGTGTAGATATTGAGGCT<br/>         GCTTCGTGTCGGCACGAAGTGTCTTCCGATGCAGTGTCCAGTCATGACCTCGATCCATCGCGTATAGGGACGCCCCCTGCTCG<br/>         CGTTACTGCCAAGCGAGCGTGGTGTGGTGGCCCCGACCTACAACCTTGGCGCAATTATCGAGCTGGTAGACGACCAGCGCTGAC<br/>         GAGCTGGCGCAATGACGACCTAATTGGCGCACAGTACTAGGCATCGTCATCCAATGCGACGAGTCTTACACTATCTTGGATAT<br/>         GATATGGCGCACTACACATGCTAGCCGCTGGGGAGATTAGCTCGAGTTGCCCTTTGCCCGATCCCAGGAGATACGCTCTAAG<br/>         CTCGGCAATCGCTCTTGGCGTGCAGATGCTAGCAAAAAGGTGTACTTCTCAGCGGAGCAGAAAGATCATGTTTATTGGAAGC<br/>         ATCAACCTGCGCCGTCTTGTAACTTGTCAATCGCGCACGTAAGTAGCCTAGAGCGCCAGGGGCGGAAATTCGCCGAAAAGT<br/>         TTTGCCGGCGACAAGCACGATCGGCTCCTAATAGGAGGTGAATTAGATAGGGAAAAGATCGGGATGCTACTAGTTTACTGCG<br/>         TCACGCTGAGGGACTCATCCTGGGCTACAATCCTATTGCCGAGATAGTATTTCTTAGCTTCTGAGGGAGGTCAATTTGAATG<br/>         TGGTTATATGCGAAAAAATAAAAAAAAAAAAAAAAAA</p>              |

Table S11

|                   |                                                                                                                                                                                                                                                                                                                                                                                                                                                                                                                                                                                                                                                                                                                                                                                                                                                                                                                                                                                                                                                                                                                                                                                                                                                                                                                                                                                                                                                                                                                                                                                                                                                                   |
|-------------------|-------------------------------------------------------------------------------------------------------------------------------------------------------------------------------------------------------------------------------------------------------------------------------------------------------------------------------------------------------------------------------------------------------------------------------------------------------------------------------------------------------------------------------------------------------------------------------------------------------------------------------------------------------------------------------------------------------------------------------------------------------------------------------------------------------------------------------------------------------------------------------------------------------------------------------------------------------------------------------------------------------------------------------------------------------------------------------------------------------------------------------------------------------------------------------------------------------------------------------------------------------------------------------------------------------------------------------------------------------------------------------------------------------------------------------------------------------------------------------------------------------------------------------------------------------------------------------------------------------------------------------------------------------------------|
| <p>ERCC-00097</p> | <p>GGGAATTCCTTCATAATACCACCAAAATACCAATTCGAAAGTTTTAGCATATTCAAACAATATAAAATCTTCAGATTGGACA<br/>         TTAATTGGGACTGAAAGTCCCAACTTAATGGACGTGTGGTATCCACACCATAAAGGGGCTACGCCCTCTTGGGATACTCCCC<br/>         TAATATTGCTAATTTACACCTCCGAGCATAAGCGAGGAGGTGTTAGGTTTTGATGAACCTTTTACTAAAAGGTTTCATACCAAT<br/>         AGGAGGTTTTCCCCCTATGGTAGTTAAATGTACATTGGATATTCCTTTCTACTCTTTGACATCATCTTTAAATGTTGCTCTGCC<br/>         AGTTCITTAAGTTTGTITTTCAATAGCTTCAGCCTCTTTGATGAGATTTTCAATATTTACATTTAGATTGAACATTTTATTCAA<br/>         AACCTCTAATAGATTAGCCCCCCTCTTGGGTCTGGTCTAATTCCAACAGTTTCAGCCAACAAACCAATAGCATCAAACCCAT<br/>         GTCATGGCAAAAAAAAAAAAAAAAAAAAAAAAAAAAAA</p>                                                                                                                                                                                                                                                                                                                                                                                                                                                                                                                                                                                                                                                                                                                                                                                                                                                                                                                                                                                                               |
| <p>ERCC-00098</p> | <p>GGGAATTCGGAGGTCGCAATTACATCGGTTCCGTGCCGTAGAGGCTGGAAGGGGCATAAGAAGCAGTGATACCAACGCTCTC<br/>         CCCC GCGCTCTCGTGAGAGCAGACCATGAACATCGCAGAGGAGAATCCTGCATGACTGAATGCGCAGAGCAACTGTCACCAC<br/>         GTGGTTAATGAGAAGGCAGA ACTCAACAGACAGCTCTGGATCTGCTGCATCCCAGGGCAAGAATCAGGAAAGCAGATGCAGTA<br/>         ACCATAGGCACGTGAAAATGCTCCCGGCCACACTTTGGAGCTATTACCATGGTCGGGCCCAAACATAAGTGGACAGCTAGAAC<br/>         GATTTCTCAAGCCTGGCAACGTGGGTTAGA ACTCCAACCCCTCGCACGTAGTATGGCGCTGGAGTAAAGAGCGCTCTGTTAGC<br/>         AAGCGACCAGTCTCCCGAAAGTACAGGATGTGCATGTTCTAACCAAAGGGTTCGACAGGACGATGATTGCTAGTAGCTTGACAA<br/>         GGCTATCCTAGTCATCCTGAATCCGGCCTATCAAAGGAATGCGTGGCAGGTCAAGTGACGAGAGTGGAAGAGCTTCCCGTTGA<br/>         CAAGCGGCAAGTAGACTGTGCCTACCCGGGCTTTCCAGACCTAAGATATCTGCATTCAGCAGAGTGTGTGTTCCGGGCAGCA<br/>         GTGTGCCTTCATTCGTCAACTGGAGCCTAAGGCCCAA ACTCGATCATTGATGACTACTCGACAAAAGAGGGTGGTATACAGA<br/>         AAGAGGCTTGTGTCGCCGAAACGCTTATCCGCACAGTAAAACCTCCCCAGATGACCTTCTCCCTCATAATCACTTAATCTGA<br/>         GCGCAGGAGGCAGGCTGTATTAATTCCGGCCTCCAACCGGACCGTGAACGACGCGACCAAGTGGTCGACGGGACATGCCAG<br/>         TATTTGGCCGTTCTGCCGATTCTCAGCTAGCAAACCAAGATCGTACTACGTACGCGCCTGGATAGATCGACGGCTGTTTAATA<br/>         AGAGTCACTCCAGGCCTGTGCTAGGATCAGGGCGACCATGCCAATATCAACTCAAGGACAAGTTGACGCCTGCCITCTGGGG<br/>         TATGGATCAAAGCCCACGTTACCATGTAAGACCGTGTGGATTTTCGAAAAAAAAAAAAAAAAAAAAAAAAAAAAA</p>                                                                                                                                                                                                                                                                      |
| <p>ERCC-00099</p> | <p>GGGAATTCGAGCTCGGTACCGGGGATGCAAATGAAAGAGGAGACATTTTATCTTGTCCGTGAAGATGTATTGCCGATGCAAT<br/>         GAGAAAAACATTAGAAGTCAAAAAGCTGCTTGATCGAAAAAAGCAGATTCAGTAGCAGATGCCGTTCAAAGGTCGATTTAA<br/>         GTAGAAGTGCITTTTATAAATACAGGGATGCTGTTTTTCCATTCTACACCATGGTAAAAGAACAAATTTATCACACTTTTCTTT<br/>         CATTTGGAGGATAGGTCAGGTGCGTTATCTCAGCTTCTTCAGGCGGTAGCTGATTCTGGAAGCAACGTTCTTTCCATTCACCA<br/>         GACCATTCCGCTTCAAGGCAGAGCAAATGTGACACTGTCTATCAGTACGTCCGCATGGAAGAAGACATTCATACATTAATGAA<br/>         TAAGCTCAGGAAGTTTGATTTTGTAGAAAAGTTGAAATATTAGGTTTCAGGTGCATAAGGGAGAGAAAATCGTCATGAAAGTC<br/>         GGTTATTTAGGTCCAGCAGCTACATTTACACATCTAGCAGTCAGTTCTTGTITTTCAAACGGCGCCGAACATGTTGCTTACCG<br/>         CACCATTCCGGAGTGTATAGATGCAGCCGTTGCAGGCGAAGTTGATTTGCTTTTGTTCCTTTGGAAAATGCTTTAGAAGGAT<br/>         CTGTTAATCTAACAAATAGACTATTTAATACATGAACAGCCTTTGCCAATCGTGGGTGAAATGACGTTGCCGATTCACCAGCAC<br/>         TTGCTCGTCCATCCCTCAAGAGAGAATGCATGGAAAGAGCTCGACAAAATTTACTCACATTCACACGCGATTGCGCAATGCCA<br/>         TAAATTTCTTCATCGACACTTTCCTTCCGTTCCATATGAATACGCCAATTTCTACCGGGGCGGCAGCAAAGTTTGTGAGTGACC<br/>         ATCCCAGCTGAATATCGGGGTCATTGCCAATGATATGGCAGCTTCTACATACGAATTA AAAATCGTGAAACGGGATATACAG<br/>         GATTATAGGGACAATCATACAAGATTTGTTATCCTGTCTCCCGATGAAAACATATCTTTTGAAGTGAATTCAAAATTGAGCTC<br/>         TAGGCCCAAACGACCTTAATGGTCATGCTGCCGAGGATGATCAGTCCGGGGCGCTGCATAGAGTGCTGTCTGCATTTTCTT<br/>         GGAGAAATTTAAACCTGTCAAAAATTGAGTCACGTCCGACTAAAACCGGATTAGGCCATTATTTCTTTATTATTGATATTGAG<br/>         AAAGCGTTTGATGATGTATTGATTCAGGGGCCATGCAGGAGCTCGAAGCACTCGGCTGCAAAGTGAGGCTTCTGGGTGCATA<br/>         CAGTCTTACCAATTATAAAAAAAAAAAAAAAAAAAAAAAAAAAAAA</p> |

Table S11

|                   |                                                                                                                                                                                                                                                                                                                                                                                                                                                                                                                                                                                                                                                                                                                                                                                                                                                                                                                                                                                                                                                                                                                                                                                                                                                                                                                                                                                                                                                                                                                                                                                                                                                                                                                                                                                                                                                                                                                                                                                                                                                                                                                                                                                                                                                                          |
|-------------------|--------------------------------------------------------------------------------------------------------------------------------------------------------------------------------------------------------------------------------------------------------------------------------------------------------------------------------------------------------------------------------------------------------------------------------------------------------------------------------------------------------------------------------------------------------------------------------------------------------------------------------------------------------------------------------------------------------------------------------------------------------------------------------------------------------------------------------------------------------------------------------------------------------------------------------------------------------------------------------------------------------------------------------------------------------------------------------------------------------------------------------------------------------------------------------------------------------------------------------------------------------------------------------------------------------------------------------------------------------------------------------------------------------------------------------------------------------------------------------------------------------------------------------------------------------------------------------------------------------------------------------------------------------------------------------------------------------------------------------------------------------------------------------------------------------------------------------------------------------------------------------------------------------------------------------------------------------------------------------------------------------------------------------------------------------------------------------------------------------------------------------------------------------------------------------------------------------------------------------------------------------------------------|
| <p>ERCC-00104</p> | <p>GGGAATTCGAGCTCTGCAATCTCTTCAACAGCCTCTGCTAAGTATTCTGCAGCTGCTCTGCTAACTCTCTCAGCACCAGCCTT<br/> TTTTCAATATTCTCTCAAATGGTGCAACTGGAAGCTCAGCCATAATACCACCTCACAATAGATTTCCAATAAATACTGTTATAA<br/> AATCCTTTATTTAACTTTTCGGTCATTTTTTCATTTTTTTGTGAAAGTCTTTGGAAAATTTTCCACACATAAAGAAGGTATTAA<br/> AAAGTGTGACACTAAAATTATAAAAAACACTATTTATAATGTATGTCACAAATTTAAAATATAATTTTATGAAAGATAGATAA<br/> ACATAAATTGGTAGAGTTTAAATGTGATATTTATGATAATTACTATAGCTTCGGGTAAAGGAGGGGTTGGAAAACTACAACA<br/> TCAGCATCTTTAGCAGTAGCACTTGCTAAATTTGGGAAAAAAGTTTTAGCTATTGATGGAGACATATCAATGGCTAATTTAGG<br/> GATTCTATTCAATATGGAAAAGAAAAACCCCTCTTTACATGAAGTTTTGAGTGAAGAGGCAGATGTTAGGGATGCAATTTACA<br/> AACATAAACTGGAGTTTATGTATTGCCAACGAGTTTGTCTTTAGAAGTTATAAGAAATCAGATATTGATTTACTTCCAGAT<br/> GTGGTTAATGAGGTAGCTGATGATTTTGATTATGTAATTATAGATGCTCCAGCTGGGTAAATAGAGAAATGGCTACTCATTT<br/> AGCTATTGCTGATAAACTTTTACTTGTGTGTCACCCAGAGATGTTCTCAATTATTGACGCTGTTAGATTAAGAAAGTGTCTG<br/> AAATGGCTGGAACACCTTTAATGGGTGTTGTGTTAAATAGGGTTGGTAGAGATTTTGGTGAATGGGTAGAGATGAGATTGAA<br/> ATGTTAATAAAAGGTAAAGTTTTAGTTGAAGTCCCTGAAGATGAAAATGTTAGGTCAGCAGCTTTAAAAAAGATGAGTGTTAT<br/> TGAATATAGAAAAGATTCTCCAGCTTCTCAAGCTTATATGAAGTTAGCTTCAATAATAGCAGGAGTTCCTATTTACATTGAAG<br/> ATGAAATTAATAAATAAAGGAAAGAAAGCTTTATAGATAAAATTAAGAGATTATTTAGGATGTATTAATTATCTTGATTTAAA<br/> AATTTTAATTATCATCCTTTTCCAATAAAACCGTATATGTTGGGAACGCCCTCTCAATGAACCTTTCAGTAAAAGCTTCACCA<br/> AAAATGGATGCATCATCTCGCTTTGCTCGATGATGCCTCTTAGTTATCTTTCTCCAAATAAACAGTATATGTTGGGAATGCCA<br/> TCTCTATCCCTTCTTTTTCAAATTCCTCTTTTATCTTCAAATTTATTTTCATCAACGGCATTAAATAGTAATCAAATCCCATG<br/> TTTCTAACAAAGTATTCTACCCCTCAAATTTAACTCCAATCTCCATATCCCTAAAAATGCACTCTATATGGAGGGAGAGTAGC<br/> TGGATGATTTTCAACAATCTCTTTTATTATCTCCTTAGCCCTCTTAATTTTCTCTACCGGTGTGTTATAAGTTAAACCGATAG<br/> TCATTAACCCCTTCTTCTATCTCTAACTGTTAAGTTTTCAATGGCTGAATCCAACAATTCTGAGTTTGGGATAGTTATTAAA<br/> GTGTAATCAAAGTTCTAATTCGTGTGCTTCTTATTCCAATCTCCTCTACAATCCCTTCAGCCCTTTAACTTTAACCCAATG<br/> GCCTAACTAAAGGTTTTGTCAATCAATATTAATAATCCCAGCAATGAAGTTTTTTTATGGTGTCTTGCATAGCCAAAGCTAAAG<br/> CTAAACCCCTACTCCTAAACAGCCAATAAAGCAGTGATATCATAACCAACAGAGCTTAAAGCCGTTAATATACCAAGAAGT<br/> ATTGTTAATATCTTTACAACCTTTTTCAATGGCTTTATTATGTGTTTCGTTCCAACCTCTGTTTCTGTCTTTTCCGGTCAATGGAAT<br/> TAGGTAGTGTTCAAATATCCCAAAAAAAAAAAAAAAAAAAAAAAG</p> |
| <p>ERCC-00108</p> | <p>GGGAATTCCTCTGTGTCATGATCGTGAGTTGTGCGCAGTGTCTGTACCAATACTCTGGTGGAGCTATATAAGCCGCTGTTGCGT<br/> AAATCAACGGCATGATCCCTATGACCGCGTCATGCTAACTGATACACGCTGCTCGAACAGTGATACGCACACTGATAACTATG<br/> CGCAGACGCTTGAAACGATGTGACATCGCTTCTAGAGTATGAGCCGCAATGCACGACTGATACTCGATATGAGCAGCAGTCGG<br/> CTATGATTTGCAATGCTTGACATGATCCTGATCGTGCCTGCGATGTCTGATAATACGCTCGCATGATATGTATTGCGCTC<br/> AGATGCTGGAGATATGCCATGCGTGTGTCAGTATGCCATGTATGCTGATATGTGCGGATCTATGTGGTGACTATGAGATCCA<br/> TGTGATGACGTTGCAGTCTCTGTGACCTTATCGACGCGCATGTGAGCCTATAGACAGCGATGTGAGCACTCTCATCTGCGGAT<br/> CAGTCTATCCTCGCTGATGCTCAGTGATACACGCTGATGCACGTAGTGAGCATCCTGTGCTCGCATATACCGCTGCTGCACTG<br/> ATATGAGCCAGTGCTGCTGCTCTTACGGAGTGTGCTCGGCTATAACAGCGAGTGCTACGCCTAACTGGCTGTCTAGCACTG<br/> TAGCTGGTGCATGTACTCGACTGCCGCTGCATCTACTATAAGACTCTGACATTAGCGTATAGGCTGATACATTAGCTCGGATG<br/> CTATCAGCTTGCGCCTATTATATGCCTGACGCGGATCTATCAGAACGACTCGGTAGCTCATATACTGGATCACGGTGCCACA<br/> ACATGCTACACGAGGTCTCAGACTCTATCCCGTGGACTCAACGTGCATCTGCTATGCTGAGCGCGTATCTGTGTACCTGTCCG<br/> ATGCTCTGATCTACACTGCCGTGATCGTTATATGACGAGACTGTGCGCTCATAGCCGACACTGTGCTCGATAAGACCACGCTG<br/> TGCGGATATAAAAAAAAAAAAAAAAAAAAAAAAAAAAAA</p>                                                                                                                                                                                                                                                                                                                                                                                                                                                                                                                                                                                                                                                                                                                                                                                                                                                                                                                                                                                                                                                                                                                     |
| <p>ERCC-00109</p> | <p>GGGAATTCCTAGCGGAGTGTCAAATTTTCGGAAGGGGGCCATAATGTTTCTTTACAATCGCACCAGTTAGCGTGGCGTATAACCAT<br/> GTTGTTAACAGCGCCATAAGTGCCTGATCCGCGGGCAAACTACGCAACACTGTGACTGGGTGCTAGGTCGACGAACAACCTGA<br/> CGCAACTAGATCATGGGAGTGCCCAAGTAAAAATTGTGTGTCAGGGCAACAAGTGACGATAGCGCGGTAATGGTATCATG<br/> ATTGTGACCTCGGTATCTCTTGTACAGTTTACGTGACGCGAAGTCTGATCACGTTTAACTAGCTCAGGGGTATTAAATAACC<br/> GAAAGGTTTCATGTGGATGTGTGAACTTGACAGACAGAATGACCCATAGTCTTTTACCCAGGTAGCTGAGGGCGACGCACTTGAC<br/> CATCCGAATCAAACCTGAGAGATCGAAATAGCCTCACCCCTTGAACCTACAAAGCTCACTTTAGCCCGTTAAGTTGTGCAATCA<br/> CTAGATCAGAAGTCTCCCACTCAAAAAAAAAAAAAAAAAAAAAA</p>                                                                                                                                                                                                                                                                                                                                                                                                                                                                                                                                                                                                                                                                                                                                                                                                                                                                                                                                                                                                                                                                                                                                                                                                                                                                                                                                                                                                                                                                                                                                                                                                                                                              |



Table S11

|                   |                                                                                                                                                                                                                                                                                                                                                                                                                                                                                                                                                                                                                                                                                                                                                                                                                                                                                                                                                                                                                                                                                                                                                                                                                                                                                 |
|-------------------|---------------------------------------------------------------------------------------------------------------------------------------------------------------------------------------------------------------------------------------------------------------------------------------------------------------------------------------------------------------------------------------------------------------------------------------------------------------------------------------------------------------------------------------------------------------------------------------------------------------------------------------------------------------------------------------------------------------------------------------------------------------------------------------------------------------------------------------------------------------------------------------------------------------------------------------------------------------------------------------------------------------------------------------------------------------------------------------------------------------------------------------------------------------------------------------------------------------------------------------------------------------------------------|
| <p>ERCC-00111</p> | <p>GGGAATTCGCCCTAAGTTCCGGTCCGCAATTTTCGTTTCGTTGGGACGCTTGAAGCGCAAGTAGAAAACGAGATAGGGTGTCCC<br/> ATCTAAACCGCCGTGCCAATAGCTTTAAAGGCCAGGAAACATTTAATATCCCTAACACAGCAGGTCACCAACGGCATTACGA<br/> CTTTACGAGTTTCGCAGAACAAGACTTTGCAACTGCAGGGGAGCCCTTCGATGCATCCGAATGAGGGCGAGCGTCGCAGATTA<br/> ACTTCGAGCAGTTAACCAAGCAAGGATATTTCCGGCATCAAGCGTTTCTCCCTACTAATATCCTTCCTTATGTCCCGCATTAA<br/> ACAGCACTCAGCATCTCAAACAATCACAAAACAACCCACCTCATCGTTGACCAGATGATAACGTGGGACATTATCTTTGGGCA<br/> ATACCACCAAAATCGTTCTTTATGGGGTATCGCTCTTAAGCAGCGCACTTCTGCATAACTATGCCATACAGTTAGGTGCTACC<br/> ATGAACATCCCGAGCTGCGTTGCATGTATCGGGTATGCCAAGACCATACTCCAATGCTGCAGGGGTTAAATTCTCCGTTCT<br/> CGTCTAATCTAAGAGAATTGTATAGCTTGCAGGCTAACATCCTGGGTCCAACCCACATTGTAACCTTCGCTGATCCCACCAC<br/> TAATTTCTAGGGTTAGTGAAGGTTTCGATACATCGCGCATTTGGGGTCTCGGTCAAGAGGAGCGCGTAAGTAAAGACGCCTATC<br/> TTCCAGTTTGATCGGGAAACTACCCGAGGGGGATGGTGTCAATTGGGCCTCGTCTGAACACAAGAGAGATCGCACGCGGAAA<br/> CCGTTAACGCAAGAATATACAGCATATGGCATGTAAGCGAAATAACATCCTCCCCTGGGTGCACAGCGAATTAGTATCATAG<br/> TAGAATTAAGCGAGATCCATGACGTCACCGCTACTCAATCATCATCCACGTCTCGCGTCATACCCAAAAAAAAAAAAAAAAAAAA<br/> AAAAAA</p>                                                                                                                                                         |
| <p>ERCC-00112</p> | <p>GGGAATTCAGATGCCTGGATAGGTTCAAGTTACGTTTACACCGTTCCCACCCCACTAACCACGACCTTTCTCGCCTTTGTTTT<br/> ACCAACGCCGGCTAACAGGTCCGGCCCACTAATATTGTTAAGGCAGGCGTTCTGTACTTACTCGATCGTTCATAGCCCCACG<br/> ACATAGTTTTTAGTCATTACGTAGCCGTTATAGAACTCACCTGTTGTAGAAGGTTACAACCAGATCGTCTTACTTATGGCAT<br/> GCTGGCGTAGACAGGTGCCAATTTGCGGCCAGTACTCGGATGTTTCGTTGGACTGATCTGGTCTCTGTTCCCCTGGTAAAACG<br/> TCGCTTCACTCCGTAAGGGCGAATGTAATGACCGTATTCTAAGGTACGGATCTACACTATGTGCGGGCGAATAGACTCGGGC<br/> CCGTAGCGGGGAGCAAATACTTGATCGCAATCTCTGACGTCAACTGATGTGCGGGAGACTGCTGCGCACCCAATAGGTACCAC<br/> TAACGTCCGTGTGATTTTAACCGGTAGGAATAAACACCGTCTTATACAGCTACGTTTTTCGATTTACTACCGAGCCGTTTGCG<br/> AGAACATATGGATTGGGAAATAGGCTCGAGTCCACATACAGCCTACGGTAAGTTGCTAGGCTCGCAATTCTATCCGGGTTTGT<br/> GAGTCTTAGTTGTGCTCCGGCTTTTGAATGAGCATACTCATGAAAGCGCTGCTACTATGATAAGAGTACACGTACAGGTCTCG<br/> CCCATTGGATTATGGCGAGCTGCCGCAATTGACGGACATACCTTTGAACGTAATCGCGCACGAGTGCGGATTAAGATTCTCCG<br/> CTTCAATCATGCAATGTGGTACAGCTGACTATCATTGACACCAAGCCGCTTGCAGGTATCGCCTGTCCGATAAGTTAAGAGTG<br/> AGACGAAGAGTATTCATCGAGCGCCAGGTAAGATAGTGCCACTCTAAGCATCGGTATCTAGCTTTAGTAACCTTCTCGATGGG<br/> GAATACACCTCTGCTTAACGGTCTTAATAATTGACGCGTCTTGGACGTAGTACTCTGCAGTGCCTAAACTCATAGTAAACGAT<br/> CTGGTAGGTCTTTTTACACACGGTTTTTTATCGCTTAGTGCTAAAAAAAAAAAAAAAAAAAAAAAAAAAA</p> |
| <p>ERCC-00113</p> | <p>GGGAATTCACACCGGCGCACGCCACAGGCGTCATACTTCCAAGAAGCGGCCATAGCCCAGATGCGAGGTGAAAAGTACAC<br/> TAGAGCGACACCAACATCGTTACGTTACACACCGGACGCTTGGATCAGTGGGAAGTGCTCACGCGCGGAGCCCACTGGGCGA<br/> ACAGCAACGTTATAACGGCCACTCAGTGGTTCGTCACGCGCAGCCCCGGTTCGTCCCCTATAAGGGCCTAGTACCTTTTCGAG<br/> CCCCGCGCTACTAGGCAGATAAGAACCCTCCAGCTCGGGGCCTCAAACCGATATTCCATGTGGGCCAACTGCCATGTTGTGT<br/> CCAGTCGCTATCGGAGTAGCCGCGTGGTGCCACACGACTACAACCCTCGTAATAGGGCTGCGTGCGTCTAAATACACTCGC<br/> TGTTGAGATACTAAAATTATCTGTGGATTGCCGGCATTGAGCCCACGGTAAACCCCAAATACATAAGTGTATAATGTCTCGGA<br/> CCCGTCGCAACGGTTGTTAATATGACAGGCCGCTAAAGACGTTTCTACTCCGCCATATGAGATAATATCCTTATCTTGAGACGC<br/> ATAGCAAATGTAGGAGAGAGAGGTTAATAAGGCCTAGCCTAAAGGTTCTTGAGAGCAACATCATATACCCTGTAGAACCCGA<br/> CTTTTGGGTTTAGGGCCTGCCGTACGCTACAATTCATGCTTGAAGGTTTCACTAGATCGTGTATGGACGATGACTATAGTG<br/> TAACAGGTGCAGAGCTTAACTTTGGACACATGACACTCAGTTCTGTACCAACTAGGAAGAGCGCCGGGGTAGAAGAATAAAAA<br/> AAAAAAAAAAAAAAAAAAAA</p>                                                                                                                                                                                                                                                                                                                                    |

Table S11

|                   |                                                                                                                                                                                                                                                                                                                                                                                                                                                                                                                                                                                                                                                                                                                                                                                                                                                                                                                                                                                                                                                                                                                                                                                                                                                                                                                                                                                                                                                                                                                                                                                                                                                                                                                                                                                                                                                                                                                                                                                                                                                                                                                                                                                                                                             |
|-------------------|---------------------------------------------------------------------------------------------------------------------------------------------------------------------------------------------------------------------------------------------------------------------------------------------------------------------------------------------------------------------------------------------------------------------------------------------------------------------------------------------------------------------------------------------------------------------------------------------------------------------------------------------------------------------------------------------------------------------------------------------------------------------------------------------------------------------------------------------------------------------------------------------------------------------------------------------------------------------------------------------------------------------------------------------------------------------------------------------------------------------------------------------------------------------------------------------------------------------------------------------------------------------------------------------------------------------------------------------------------------------------------------------------------------------------------------------------------------------------------------------------------------------------------------------------------------------------------------------------------------------------------------------------------------------------------------------------------------------------------------------------------------------------------------------------------------------------------------------------------------------------------------------------------------------------------------------------------------------------------------------------------------------------------------------------------------------------------------------------------------------------------------------------------------------------------------------------------------------------------------------|
| <p>ERCC-00116</p> | <p>GGGAATTC AAGCGTTCACAGCTCGGCAATACCTGTGACGAGCTGCTCGCAAGATTTACGCAGTGTGGCTATACTTGACAGTGA<br/> TGGCGCTTACTTCAGATGTATGGGTGATACTTCGCTATATGGGTGGTCACTTCTCTATGGCGCGTGACAATGTACTATGGAGC<br/> GGTCAATGTCAGTACGGATCGCGTCGATCTAGGTGACTACGCACGCCTCTGGAGTAAATCGAGTGTCCGTGCGAAATACCGG<br/> GTCATCGTGC AATAACCGAGTCATCGTGAGTAGTATGAACGTGTCGTGTTATGCAGCGGTATGTCGTGCTATAATGGCGTCT<br/> GTCGTGCTCATAAGGTTCTCTGATGTGCTAGACGTGTCCATCGAGCTGCATAGCTATACTTCGAGTCACTTGGGATACTTCG<br/> ATAGCGTTGTGAATAGTGTGCTAGGCTCCCGGGCACGTTGTTAAACTGTTGCCGCCAATTC AAGATTAGTCCAGCTCGTACTA<br/> TCGAATACACCATCGTTCGATCGAATAATCGCACCTCGTAGGAGTCGGTTGCCACTCGTTGATAGTCAACCAGGCTCGTTAGA<br/> TAGTAGCCCAGATCCTACGAGATGAGCTACGTAAC TACAGTGATAGCATATAGGGTACGCTAGAATGCCAGGTCGTAGTTCGAA<br/> TTAGTCAGGTTGGATGTCTACTAGTTGACTTGGAGTATGCCATGAAGACTCGTCCCTCGATATCAATACTCGTCCGCAGGTGA<br/> ACACTGTAGTCGGTGCTAGTGCCACTTCTCGGTATGTGTCCTCAATTATCGAGTAGGATTCTAATCAATCGTTCGCGGCTCAC<br/> TAATTGTCTGCGGTGGCTACTAATGGTTACGGTGCCTGACTAATCGTGTAGGTGTCTAATACATCGTGATACGGGCGATATAA<br/> TGCTCGATACGGCAAATATAGCTCCGTCCGGTGGATCCAGATCGCAGGGTATCGCATCGACAGACCTGGTATCGTTCGTGACGA<br/> ACGTGCTACTCGCTTATCGGGCCTGCTACATCAGTGGCGATGTTGTAACCCCTTAGCCGATCTTCTTACTTACGAGGCTACTA<br/> TTCGATCAAAC TCGCCTATCTGGTAATAACTGCGGTGATCTGGTAGCCACTACGTGCGCCTGGTAGCAAATACGGCGAGCTGG<br/> TATCACTATCGGCTCAGTGGTCCGACATAGTGCCAGTGGTTCGCATAACTGCCGCTGGGTCCAATATAACACGCAGTCGTCA<br/> ATCATAACGAGCCGATGGTTCGGCAATAGCGCCTGTGGTGACACTATGCCACCTCTGGTCTAATATAGCGCCCTGTGGTTCGTATA<br/> ATCGAGCGCGTAATCGTATATCCGACTGTAGGTGCGTAACTCGCGACTAGGTGGCTCTAATCTGCGTTGGTTGTCGCTCACAG<br/> TGTCTGGTGTTCGATACCCGGATCGGGTTCCGTAATCTTGGCATCGAGGTTTCGTACATGTCACGCGGTCTCGTTCATTCTCG<br/> GTGGTGTCTCAGTACATCCAGTGGTGGTTCGCTACATCACACGGTATCCGGCTAAACCTCTGGGCATCCGTATTAAGCGACAT<br/> TCCTACGACTTATCAGCACGTCTACGGTATAACAAGGCGTGCTACGGTCTAACGACGCTGGTAGCAGTCTATCAGATCGCTA<br/> GTACGAGTTAGAGATGCTTAGTACGCCTTCGAATCTATGATGCTCGTGCTCACGCGATGCACTCGGATTATGGCACATGCACT<br/> CGCGTAATGACGCTGCATCGCTCAGTATGATCCATGAGCGCCGTGAATGACGCATGAGCCTCGTATCGAGTGCATGAGCTGTC<br/> TTTCACATGATACATCGCTCTAAATCATCATGCGACAGTCTCGACAGCAGCTCAGCATCTATGCATCATGTGCCTCACTAGGA<br/> CATCATGCTCGACTCTGAGACACTGATCGAGCATTAAAGACTCTAGAGCGGCCCGCCGACTAGTGAGCTCAAAAAAAAAAAAAA<br/> AAAAAA</p> |
| <p>ERCC-00117</p> | <p>GGGAATTCAGATACTATCAGGCGCCTATGGGCAAATCTGGCCTCCAAACTCCGAGTGTACCCGAACCGTAGGAAATTCCTTCC<br/> CCAAGCGTGTGCAATACTCGTAGCACACCCGGGATAAATAGGAAGGAAACATCCGCGGGTCTTACGGTGAAGCTGTGGGACCGC<br/> TTCTGTACACGGCGTCCAATCAAGGGGCTTGGCATTGGCCAGATCGAAAGTGTGAACCACAAACGACTCTATCGGTGACG<br/> CCTCCAAGCGGAAACTCCAGGCAATGGGGAACCGCAGAAAGATGTTCCGCTAGACCGCATTAATACCACATCTGGGCTTAGA<br/> AGCCCCCTCGGTGCTCCAGGGAGGACGGATCGGAATTAACGTGATATGGAAC TTTAACTGATCAGGCCTTGCCCTTACTAATG<br/> GCGCGTTGTAACGGGCCCTTGAGGGAATGTCACTATTGAGGCACCCGTTGACCCCTCAGAGATATACCATTCCGCCATTGTAG<br/> CTCTCCTCGTACCACAGTCTTGCAAATACTGTCATAGCTATGGAACCGCCCCGACCGGGATTATGGCCTCTCATGGACTCA<br/> GTGTGATCAGAACCTGCTCGAGTGGGGACTGGATGCAGAGCTGATCTCTGTAGTGTGTTGTGTCGCGGGAGCACCACCGGATG<br/> ACAACCGCCATATTCAGTGCCCAAATACTCACTGGTAACGGCTTGAAC TCATGCTAATTCATTATAGTTCTTTAAACATAA<br/> GCTTTGCCCTCGGGGCCATCCCCTGAACCATGCGGTGAGTCACGTACGCAGACCTGAAAATTAAGATCCGGACAGGCCCGA<br/> CCTTAGCCAAGGGTAAGAACCCTTCACTTAGTGAACATCCTATCCAGTCCGTGCAGCATCGTCTACGGTCCGGGCTTCTGCC<br/> GAAAGGTCCATTAAACAGACAGAAGGATAAATGGCTCCAGCGGATACGCGCATATTCGGTTATCGCAGTTACCGTGCAAACT<br/> GCATCCCCGCTGGGATAAGCACATGAGATGGACAAGGCTTCCTATGAGTGATTCCAAAGAACATTGCCCGACGACCGAGCCTT<br/> CAGGTAATCCACGAGACATATGCTAAC CAGTGGTGCATGGAAAAAAAAAAAAAAAAAAAAAAAAAAAA</p>                                                                                                                                                                                                                                                                                                                                                                                                                                                                                                                                                                                                                                                                                                                                                                                                                                                                                                                                                                    |
| <p>ERCC-00120</p> | <p>GGGAATTCGCGCTCTCACCTGGCTTGATTCAAGTAAATGGAGCACTTGTGGGAGTGCCGCGACACAACATCCGCTAGCCTCAGT<br/> CGAATGACAAGTTAGAACAGGAGTGGGGCCGATCTCTGCAAACCTCTATTGTCAGGGGTGGTGGACGGTATAGGGTTTTGCGC<br/> CTACCTGAATGCAAGGGCTTACCTCCAACGGCTTAGATGTGCCTAGAAGGTACGCCCTTCAGTCAAGACCGGCCCGCGTTAG<br/> TTAAAGCAGGCTTGTACACATCACGTAGTTCCTGCTGCGTTTTAAGTCATTAGCTCCAGTAACCCATCAACCATTACCGTA<br/> TAGACTTATCCGAGTGTGATCAAATAACGCTGAGCCTTATGATCCTCGTCGACCCAACAACCGCCGGATATACGTTGGGATAT<br/> AAACGAAACACGTACCGCGGAGTGACACGCGTTGACGTTACATGGTAAACTCGTAGCCAACCTTAACATTCCCTGCACTATG<br/> TTAGTGCCTACAACATTAAGGGAAAAAAAAAAAAAAAAAAAAAAAAAAAA</p>                                                                                                                                                                                                                                                                                                                                                                                                                                                                                                                                                                                                                                                                                                                                                                                                                                                                                                                                                                                                                                                                                                                                                                                                                                                                                                                                                                                                                                                                                                                                                                                                                                |

Table S11

|                   |                                                                                                                                                                                                                                                                                                                                                                                                                                                                                                                                                                                                                                                                                                                                                                                                                                                                                                                                                                                                                                                                                                                                                                                                                                                    |
|-------------------|----------------------------------------------------------------------------------------------------------------------------------------------------------------------------------------------------------------------------------------------------------------------------------------------------------------------------------------------------------------------------------------------------------------------------------------------------------------------------------------------------------------------------------------------------------------------------------------------------------------------------------------------------------------------------------------------------------------------------------------------------------------------------------------------------------------------------------------------------------------------------------------------------------------------------------------------------------------------------------------------------------------------------------------------------------------------------------------------------------------------------------------------------------------------------------------------------------------------------------------------------|
| <p>ERCC-00123</p> | <p>GGGAATTCTTAAGAGAGGAATAATTACTTTTTTCATCTTACCCACCAAGTTTTAGTTTTCTTATTCTTTCACTTAATTTTTTCGA<br/> CCTCCTCCTTTGTTAATCTTGTAGCTTTTTTAACTCCTCCAATTCTTTTTGTAACATTATTACTTTAATCCCCAGTATTATG<br/> TTGAGGAGTATGCTAATAGCCACAATTATATACAAAATCATCCTTATCTCCTCCCGAACAATCCTTTAATAAACTTAGATATG<br/> AATGATTCTTTCTTCTTCTCAAGTTGTGCTTCATATTTAGCTCCAATTAAGCTGCTATCTCCATGACTGCTTGAGCGGC<br/> TGGAGAATCTGGATACATAATAACGAGAGGTGTTCCAAATGCAGCTGCCTTCCAAACATGAGGGTCTCTGGAACAACACCTA<br/> TAACAGGAACCTTCTAAAATTGTCTCTATAGCTTTAACCCCAACTCTGTACTCTCATTTGAAACCTATTAACAATAGCCCCA<br/> ATGATGTCAGTTCCAATCTTTTTGTTATAGCGATAATTTTTAATGCATCTGATATTGGGGATATCTCTGGATTTACAACGAC<br/> AATTAACCATCTGCTGATGATATTGCTATTAAGTCTCTTTTCCAATACCTGCTGGACAGTCAATAATTAATCTCAACTA<br/> AATCATGTATTGCCTTTAAACTTCCTCAAGTTTTTCTGGTTTAGCTCTTCTGAACTTTTCTAATGAAACACCTGCTGGAATA<br/> ACTAAACTCCTTCAGGACCTTCATAAATTGCGTCCTTTATATCTGCTTTACCAGCCAACACATCGTTTAAGGTTACTGGCTT<br/> TCCTTCTAACCCCATGATAGGCTCTAAGTTTGCCATTGCTATATCAGCGTCCAAAACAGCCACTTTTTTTCCAAATTTTGCAA<br/> GAGCCACAGCAAGATTTGCAGATATCGTTGTCTTTCCAGTACCTCCTTTTCCAGATGCTATCGCGATAGCTATTCCATTAATG<br/> TCACCATTCTAAAAAAAAAAAAAAAAAAAAAAAAA</p>                                                                                                         |
| <p>ERCC-00126</p> | <p>GGGAATTCGAGCTCGGAGACCGACCGCGCATTAGTCAATCATATAGTTCGATAAATGAGACGTCACGGATTTGAGTATCATT<br/> GCTAGAAGTACTTACCTATCTAAACGCTCAGGTATGCCTGCGCTGAGACTCAGCATCTCAATGTGACCGAGCTTGTGACTCCG<br/> CATCCTCCTGCAATATACCCATCGGCCCTCACGGGGTAACGTAGCTCTTCTGCGTACACCTGGCTAGAGGGTCTTACCGGCT<br/> GTAAGCTCACTACAATCCAGGTACAGAGTGCCTTAAACGGCCATTAGAGGGCCGCTACACCCGTCAGAATTTAAACGTATGGG<br/> CGGCGAAGCGGATAATGGTTAGACCTTCTTGCAGGGCAAATAACGATTTTGCAGTGCCTTTAAGATGGAGAATGGACA<br/> AACGCTCATTCTAGTGAGGACATCGACATCGTTACGATGCAACGTCGAGTGGCGGCATAACACTTGGCTCGGTCCTACCCGC<br/> GACAGTGAACAAAAACAGTTGCTCTACATTCGCTATGCATTTTAAACGGATATGCCTTTGCCCCCGTCCGTCATGGACGAAA<br/> AGTTTGGCTATGCGCGGAACATTATGCCGGATTACTCGTTATCGCTGGGTAATCGTCCGTTGGGCCCGCTCTTACGCGATCAG<br/> TGCCGTTAGCACATGCGCGAATAGGGCGGATTCGAAAGCATGTGCCAAATTCCCATGACCCTGTTCAGGTGAGCTGACAC<br/> TATCAGTCAAGTTGTTTCTTAAACAGGAAAAACGCTGTTTCTCCGTTTGCTTGTACCATGGGGGCAGGGAATCTTCGAGC<br/> GCGGAATGTATACACTATTATCTCATGTGCATGTCCAGAGCGGGCTAACCTAATATACCTGGTTCGATCGTCCGAGATCAGT<br/> TGGGAATAGCGGAGCGGATACGCTGGAACGCTGGGGCGTGCCAGTAACTTACTGTTCTCCAGTTCCTCCATCATGTTCCGT<br/> CTAATCCGGAGATGTGTAGCTGCATTGTGCTCCGTTGCGGTACTCCTCGACTGGGTGCCATATGGGGCTACTGGCGAGAGGAAA<br/> TTTGCTTTTGTGTATTTAGGCCCGTGGCACCTAAAAAAAAAAAAAAAAAAAAAAG</p> |
| <p>ERCC-00130</p> | <p>GGGAATTCGAGCTCGCATTGAAAATTCTATGGAAGAGCTAGCATCTCTGACGAAAACAGCAGACGAAAAGTACTGACCAG<br/> CGTCACACAAAAACGGAACAGGGCTGACGCCGCTACATATATAGGAAAAGGGAAGGTAGAAGAGCTGAAGGCACTCGTGGAA<br/> AGCTTGAAGCTGATCTCCTCATCTTTAATGATGAACTGTGCGCAAGTCAGCTGAAGTCATTGGCAACAGCAATTGAAGTGAAG<br/> ATGATTGACCGCACGCAATTGATATTAGATATTTTTGCAAAGCGGGCGAGAACGAGAGAAGGCAAACTTCAAATGAGCTGGC<br/> TCAGCTGCAATATGCACTGCCGCTCTGACGGGACAAGGGATCAACCTTTCCCGGCAAGGCGGAGGAATTGGGGCAAGAGGTC<br/> CCGGGAAACGAACTGGAAACCGACCGCCGATATCAGAAATCGCATTCATGAAATCAACACACAGCTTTCCACTGTCATT<br/> CGCCATAGAAGCCGATACCGTGAAGAAGAAAAGAAAACGGTGTGCTTCAAATTCGCGCTTGTGCGCTATACAAACGCAGGGAA<br/> ATCAACATGGTTCAACCGCCTGACGAGTGTGACAGCTATGAAGAAGACCTCCTGTTGCCACGCTGGACCCGATGACCAGAA<br/> AAATGGTCCTGCCAAGCGGCTACAGTGTCTTCTTTTTCAGATACAGTAGGATTTATTTCAGGATCTTCCGACGACATTGATTGCT<br/> GCATTCCGCTCAACGCTTGAAGGAAGTAAAGAAGCGGATTTAATTCTGCATTTAATTGATTCTTCAAATGAGGATTATGCGGG<br/> ACATGAAAAAACAGTGTCTTCGGCTGCTTGAAGGAGCTTGAAGCAGATGATATCCCGATGCTGACGGCTTACAATAAACGTGATC<br/> AAAACTGCCTGATTTTATACCGACCGCCGGAAGGGATCACATTATGGTCAGTGCGAAATTTGAGGACGACGCTGCAGCCTTT<br/> AAAGAAGCGATTTCAGCGCTATTTGCGCCAAGAACTGTTAACGTCTTGAATTTCTGGAAAAAAAAAAAAAAAAAAAAAAAAA</p>                                                       |

Table S11

|                   |                                                                                                                                                                                                                                                                                                                                                                                                                                                                                                                                                                                                                                                                                                                                                                                                                                                                                                                                                                                                                                                                                                                                                                    |
|-------------------|--------------------------------------------------------------------------------------------------------------------------------------------------------------------------------------------------------------------------------------------------------------------------------------------------------------------------------------------------------------------------------------------------------------------------------------------------------------------------------------------------------------------------------------------------------------------------------------------------------------------------------------------------------------------------------------------------------------------------------------------------------------------------------------------------------------------------------------------------------------------------------------------------------------------------------------------------------------------------------------------------------------------------------------------------------------------------------------------------------------------------------------------------------------------|
| <p>ERCC-00131</p> | <p>GGGAATTCGCGCCGGATAAAGGCTTCTTCGGTACTATACAAGTTGTCTACGCACATTTGCCTTGGGTATTAAACTCTAGTAGGA<br/> GCGAAACTTGACATATCAAACCTCTCTGGAGAGGCATCTCCAGACATTACGGATGATCAGGTCTCAGCGAATCCTAGCTGTG<br/> CGGATAATTTGTGGCCCGCACACCAGCAAGACACCGCGTGTCTATTCCACAACTTCGACATATCAATAACGCAGTAACAAC<br/> GTTAAGTAGGGGGACAGGCAGTGCCTAAGGGGCTTGAGGTGCGCCGATTTCGCGATCTAATCTTAACAGACGAGGTGGCGT<br/> AAGATGTACCTCGTTCAATCTAAGTATGAATTTGTCCGCTGGGTAATGGTGAATTAAGAACATGCGTAAACGACCTCGTT<br/> GTAATTTGGGTGGCCCGTCTCGGCAAATTTGCCCTTGCAAGTGAAGCTCGGATTGGATGTCTCGTAAGGAATACTTATTGCGG<br/> GTGGTACGCAAATTCGCAACCATGTGAAGTAATGTGAGCGTACTTCACCTGCTCCGGTACAAGCCGCCATGTGCTCATGTTGG<br/> GAACCTCCTGCGTAACAACCGGACGCTTGCGAAAGTCATCCCCTATCGGTACACTATTGGAAAACATGACAAACGTATAATG<br/> CGTGATGACCGCAACAGGTGTAAGTGCACCAACTAGTATTGGCTCCTGTCCACATGGTCCGGGTTTCCGCCCCAAACATGCA<br/> AACATCCGAAAAAAAAAAAAAAAAAAAAAAAAA</p>                                                                                                                                                                                                                                                                                                   |
| <p>ERCC-00134</p> | <p>GGGAATTCAGGCTTTGTTATTGGTATTGACTTACAAACAGTTAAGCCATTTGAATATGATAATGTAGTTGCAATAAAAGGAGA<br/> TTTACCTTAGAAGAAAATTTGAACAAAATTAGAGAGCTAATCCAAATGATGAAAAAAGGTGGATGTGGTTATAAGTGACG<br/> CCTCCCCTAATAAAGCGGTTATTGGGATATAGACCACGCTCGTTCAATAGATTTAGTAACTACTGCCTTACAAAAGCTACT<br/> GAGATGCTAAAAAAAAAAAAAAAAAAAAAAAAA</p>                                                                                                                                                                                                                                                                                                                                                                                                                                                                                                                                                                                                                                                                                                                                                                                                                                                     |
| <p>ERCC-00136</p> | <p>GGGAATTCGAGCTTTTCGACGTTTTGAAGGAGGGTTTTAAGTAATGATCGAGATTGAAAAACCAAAAATCGAAACGGTTGAA<br/> ATCAGCGACGATGCCGAATTTGGTAAGTTTTGTCTAGAGCCACTTGAGCGTGGATATGGTACAACCTCTGGGTAACCTCCTTACG<br/> TCGTATCCTCTTATCCTCACTCCCTGGTGGCGCTGTAACATCAATCCAGATAGATGGTGTACTGCACGAATTCGACAATTG<br/> AAGGCGTTGTGGAAGATGTTACAACGATTATCTTACACATTA AAAAGCTTGCAATTGAAAATCTACTCTGATGAAGAGAAGACG<br/> CTAGAAATTGATGTACAGGGTGAAGGAAGTGAACGGCAGCTGATATTACACACGATAGTGTAGAGATCTTAAATCCTGA<br/> TCTTCATATCGCGACTCTTGGTGAGAATGCGAGTTTCCGAGTTGCGCTTACTGCTCAAAGAGGACGTGGGTATACGCCTGCTG<br/> ACGCAAACAAGAGAGGGCGATCAGCCAATCGGCGTATTCCGATCGATTCTATCTATACGCCAGTTTCCCGTGTATCTTATCAG<br/> GTAGAGAACACTCGTGTAGGCCAAGTTGCAAACTATGATAAACTTACACTTGATGTTGGACTGATGGAAGCACTGGACCGAA<br/> AGAAGCAATTGCGCTTGGTTCAAAGATTTTAACTGAACACCTTAATATATTCGCTGGTTTAACTGACGAAGCTCAACATGCTG<br/> AAATCATGGTTGAAGAAGAAGATCAAAAAGAGAAAGTTCTTGAATGACAATTGAAGAATTGGATCTTTCTGTTTCGTTCT<br/> TACAACCTGCTTAAAGCGTGCGGGTATTAACACGGTTCAAGAGCTTGCGAACAAGACGGAAGAAGATATGATGAAAGTTTCGAAA<br/> TCTAGGACGCAAATCACTTGAAGAAGTGAAGCGGAGACTAGAAGAAGTGGACTCGGACTTCGCAAAGACGATTGACTAGTTT<br/> CCCTTGTGAACTAGGATTTTCCCGGTACAAAAAAAAAAAAAAAAAAAAAAAAA</p> |
| <p>ERCC-00137</p> | <p>GGGAATTCCAAAGCAAACCTAATGAAGCCAGACACGAGATCACAGAAAATCGCTGACTATCCCGAGTGC GCGGCGAGCTACAA<br/> TCCAAGATGATTATTTTTTCACGACCGGGCGCTGGTACAGGTATATCGCTGGTACAGATGGCGGCAAGCATCGTTGTCACCACT<br/> TCCTTACGATTTCCGTTAGAGCCGAGTGGTACAGCACGTACGTTATATATGGGAGTACGGACATGCTTCCCACCTCGTCAGC<br/> CAAGATGATAGATACCCGTAGCGTGATGGTCTTATAGCTGCTCTGATGGACTTCGAAAGATCACCGTGCAGCTATTCAAAAA<br/> GCAGCCGGGAAAAGGTGGTCTCGCCGAAAGCCATGACCTCCGATCACTCCTGGCCGGTAGTCCGTTTATTGCATATTGTAC<br/> AGTTGCGCGCGCGGACAGTACATCCCCCTGGTTAAATAGAGGCACGAGCGCTCGTTTTTGGGTGATCAATATGGCTTACCCC<br/> CGAGAGAGTTGTGAGCTTGACGAAAAAAAAAAAAAAAAAAAAAAAAA</p>                                                                                                                                                                                                                                                                                                                                                                                                                                                                                                                                                          |
| <p>ERCC-00138</p> | <p>GGGAATTCCTGCTAAAAGAGGTTGGTTGTATAAGATTTGGAGAATTTATCTTAGCCTCTGGTAAAAAAGTAACTACTACAT<br/> AGACATAAAAAAAGCCACCACAAACCCAGAAAATTTAAAGTTAGTTGGAGAAATTTATGCTGAGCAAATAAAGGATGAAGATG<br/> TAAAAGTTGCTGGAGTAGAGCTTGGTTCTGTCCCTATAGCTACAGCTGTCTCAATTATTGCTCAAAAACCACTATTAATTGTT<br/> AGAAAAGAACCTAAGGATTACGGAAGTAAATAAGATAGAAGGAGAGCTAAAAGAAGGAGATAAGGTTGTTATTGTGGAGGA<br/> TGTTACTACAACCTGGAGGAAGTGTGCTAAAGGCAGTTAAAGAGATTAGGGAAAATGGTGAATTTGTTGATAAAGTTTTTGTG<br/> TTGTTGATAGGTTAGAAGGAGCTAAAGAAAACCTACAAAAAGAGAATGTTGAATTAATCCATTAGTTACTGTTAAGGAGCTA<br/> CAATCCACTCAATAAATCTAAAACCTCTTAGTCCATAGGGGAAACCCCTATTGGGATACTCCCCGTCCATTAAGTTGCTCCT<br/> TTCAGGAGCAATTAATGTCCATTTAAGCTTATAATCCACTCAATAAATCTAAAACCTTCTTAGTTTTCTTTTTTAAACCTT<br/> ACCAAATTTCTCTAATTTGCTAACATCTACATTTTTATCCTTTAAAATTTCTTTTATTGGTTCTATGAGTGCAATTTTTTTAA<br/> GTAAGTCTTCAATATCCTTCTTTTTGAAGTTAAATCTTTCCACAGCATCCAGTTCGTAATTAAGTATAAAGCAACTCCACCA<br/> ATGTTCTTTAAAGGAATCTGATATTTGGCAACTCCTCCTCAATTTAAATTTAAATCTAAAACATCCACACAATTAATCCC<br/> ATCAACACTCATCAAGATAAAAAATCCTCTCTGTGGAGTAATCATAATAGATGGGAACAAATTACTCCTTGCCCTTCATCTGG<br/> TGTTTGGATAAAAAAAAAAAAAAAAAAAAAAAAAA</p>                         |

Table S11

|                   |                                                                                                                                                                                                                                                                                                                                                                                                                                                                                                                                                                                                                                                                                                                                                                                                                                                                                                                                                                                                                                                                                                                                                                                |
|-------------------|--------------------------------------------------------------------------------------------------------------------------------------------------------------------------------------------------------------------------------------------------------------------------------------------------------------------------------------------------------------------------------------------------------------------------------------------------------------------------------------------------------------------------------------------------------------------------------------------------------------------------------------------------------------------------------------------------------------------------------------------------------------------------------------------------------------------------------------------------------------------------------------------------------------------------------------------------------------------------------------------------------------------------------------------------------------------------------------------------------------------------------------------------------------------------------|
| <p>ERCC-00142</p> | <p>GGGAATTCACCTGTCACATTTCCAATCGGCTCCAGGAAGAGAGAAGTGACGGCTTGATCCTGTAGTAATCCGGGATCGACTT<br/> AAGGGGTGCAGCGACCACGGCGGATCGGGCGTCGCAATAGTCCTCCTGTTAGGAGGGTCCTTCTAATGTTAACGCCGAATAT<br/> TAGTCATATTTTGTAGCGCCTATCAGCGTAAGATATGATTTAAGTTACACCAGGAGAGTAGCGAGATAGAACCCTCGTTGG<br/> ATCGGTCTTTCTTAATTGACTACTATCAGATCCGGCGCATGGCGCTGAGGTCAAACCTACATTACAGGCCCTGGTTTCCATGGG<br/> TCAGCGCAAGTACAGGCGAGCAGATACAACCTTCCGGAGACTTCGCCTCCACACACCGGAGACCCTAACCGTACCCAAATGTA<br/> ACTAGCGCCTCTGGTGTGAGCTTACTAGAAAAGTAGGCCGGCGGTCGACAGGAGGTTGCGCCAAAAAAAAAAAAAAAAAAAA<br/> AAA</p>                                                                                                                                                                                                                                                                                                                                                                                                                                                                                                                                                                                                                   |
| <p>ERCC-00143</p> | <p>GGGAATTCATGCAGCGTAGGTATCGACTCTCACTGTGGAGTCGTCTATGATGTCGTGGAGTCCTCTCAGAGTGCTGTAGGTCC<br/> TCATAGGTCTGTGCTGTCTCTACACGCGTGCCTGAGTCTACATTTCTGCGAGTTGGTGCTCTCACTGCGGTGTCAGTGATCT<br/> CTCCGCGTGTGACATGAGTCTAGCTTCGCGGTTCATGGTCTATCCCAGCGATGGATGAGACTACTCTGTACTAGATGGTCATGC<br/> CTGCGAATGAGTCGTGAGTGCACCAATGTCTCGATAGTGCGCCGAATGTGTCTGTAATGCCTCGAATGTGTAATCGTCAACT<br/> CGTATGTGAAGTGCTAGGCTAGTATTGACATCTACGGGCGGCTATTGACGAACCTCCGGTATATGCTCTACATCTGCAGGGA<br/> ATTGCCGACCATATATGGGTCTTGCTGATACGCTAGGGTGTCTGCTACTTAGATAGGCGTCTTGCCGCTATTTCGCGGCGTGT<br/> CTCAGAATATGCGCGACGTGTCTGGTATATGGCGACTGTGTCCGTCTATACGCATACTGGTCCACATATAGACATACTTCCAC<br/> GACATGACAAAGCGTGTCTCTACATAGCACGAGCGTCTCCTAAATAGATCCGGTCTTATCGCTGAATGTCTAGGATTCTCGTC<br/> AATGATCTACGATCCTCGCTAAGTATTACGCCACCTCGTATAGTATTGCGCGACCTGAGGATTTATTCACCTGACTCGCGTAT<br/> AATATGCCGTCACCTAGTCTAAAAAAAAAAAAAAAAAAAAAAAAAAAA</p>                                                                                                                                                                                                                                                                                         |
| <p>ERCC-00144</p> | <p>GGGAATTCAGCTAGGATAAATTGACCCGTATGAACTGTTGCCGGCTCGGAAATGTTAAGGCTCTGCGCACGCACTTTATCATT<br/> CGCAGCCTGTTCTGTCAGCGGGTACGCTAGGTTACGGTGAACCACTCGGTATCGTGCAGACAGGGATCGTAAGGCGATCCA<br/> GCCGGTATACCTTAGTCACATATACTATCGTAATATTGGCGGTTGCTGACAAGTAAATACGGCTAAACCGGTGCTTGACCAAC<br/> CACTCTCGCGGGGGTCATAAATATCACTGAGCCCGGGAAGTACCCCGTGACAGACATACGAAAAGCGTGATAACGTATTTCGTA<br/> GGTATTATTTCCGTTAGCTGGAGGTAAAGGGGTTCTGGTCTAGCCGTGTTATGTCTATTTATGAGATGGTAAGCTCGTCACC<br/> AACTCGTCACGCGATCGAAATAGCTTGGACTAATGTCCGGCACATAATCAAGTCTACATCAATCATGAATGGTTTCTGATTTG<br/> CTACCATCAGATATCATGTGAGCAAAAAAAAAAAAAAAAAAAAAAAAAAAAA</p>                                                                                                                                                                                                                                                                                                                                                                                                                                                                                                                                                                |
| <p>ERCC-00145</p> | <p>GGGAATTCCTGTCCTTTTCATCCATAAGCGGAGAAAGAGGGAATGACATTTGTTCTTACACGGCACAAGCAGACAAAATCAACA<br/> TGGTCATTTAGAAATCGGAGGTGTGGATGCTCTCTATTTAGCGGAGAAATATGGTACACCTCTTTACGTATATGATGTGGCTT<br/> TAATACGTGAGCGTGCTAAAAGCTTTAAGCAGGCGTTTATTTCTGACGGGCTGAAAGCACAGGTGGCATATGCGAGCAAAGCA<br/> TTCTCATCAGTCGCAATGATTCAGCTCGCTGAGGAAGAGGGACTTTCTTTAGATGTGCTATCCGGAGGAGAGCTATATACGGC<br/> TGTTGACAGCAGGCTTTCCGGCAGAACGCATCCACTTTTCATGGAACAATAAGAGCAGGGAAGAAGTGCAGGATGGCGCTTGAGC<br/> ACCGCATCGGCTGCATTGTGGTGGATAAATTTCTATGAAATCGCGCTTCTTGAAGACCTATGTAAGAAACGGGTCACCTCCATC<br/> GATGTTCTTCTTCGGATCACGCCGGAGTAGAAGCGCATAACGCATGACTACATTACAACGGGCCAGGAAGATTCAAAGTTTGG<br/> TTTCGATCTTCATAACGGACAACTGAACGGGCCATTGAACAAGTATTACAATCGGAACACATTCAGCTGCTGGGTGTCCATT<br/> GCCATATCGGCTCGCAAATCTTTGATACGGCCGTTTTGTGTTAGCAGCGGAAAAAATCTTCAAAAACTAGACGAATGGAGA<br/> GATTCATATTCATTTGTATCCAAGGTGCTGAATCTTGGAGGAGGTTTCGGCATTTCGTTATACGGAAGATGATGAACCGCTTCA<br/> TGCCACTGAATACGTTGAAAAAATTATCGAAGCTGTGAAAGAAAATGCTTCCCCTTACGGTTTTGACATTCCGGAAATTTGGA<br/> TCGAACCGGGCCGTTCTCTCGTGGGAGACGCAGGCACAACTCTTTATACGGTTGGCTCTCAAAAAGAAGTGGATAAGCTGTAC<br/> AATCGTTTCATCATTCGGCGTGCGAATTAAAAAAAAAAAAAAAAAAAAAAAAAAAAA</p> |
| <p>ERCC-00147</p> | <p>GGGAATTCCTTGCTTAACCTTAATCTTGCCTTATTACAATATTTTTAGAAAAATAAAAAGTAAAAATAAAGCAAATCCTTA<br/> ATCTTTGGTGATATTGATGGAGAGGTATGAAATCCCTAAAGAGATTGGAGAAATAATGTTTGGCTTGTGTCTCCAGATTACA<br/> TAAGACAGATGTCAGTTGCTAAGATAGTTACACCAGACACTTATGATGAAGATGGTTATCCAATAGATGGAGGTTAATGGAC<br/> ACAAGATTGGGAGTTATAGACCCAGGTTTGTGTTGCAAAACATGTGGAGGAAGGATTGGAGAGTGTCCAGGGCATTTTGGGCA<br/> TATAGAGTTGGCTAAACCAGTAATTCATATAGGATTTGCCAAAACAATATACAAGATATTGAAGGCAGTTTGGCCACACTGTG<br/> GAAGAGTAGCAATAAGTGAACCTAAGAGGAAAGAAATTTTGGAAAAGATGGAAAAATTAGAGAGAGATGGAGGAAACAAGTGG<br/> GAGGTTTGTGAAGAGGTTTATAAAGAAGCTTCAAAGTTACAATCTGCCACACTGTGGAGAGATAAAGTATGATATAAAGTT<br/> TGAGAAACCAACAACCTACTACAGAATTGATGGAATGAGGAAAAAACATTAACCTCCATCAGATGTTAGAGAGATTTTAGAGA<br/> AGATTCCAGATGAAGATTGTATCTTACTCGGCTTAAACCCAGAGGTTGCAAGGCCAGAGTGGATGGTTCTCACCGTTTTGCCA<br/> GTTCCACCAGTAACTGTAAGGCCATCAATTACCTTGGAACTGGAGAGAGAAGTGAAGACGATTTAACCCACAAGTTAGTTGA<br/> TATCATCAGAATCAACAATAGATTAGAGGAGAATATAGAAGGAGGAGCACCAAACCTAATTATTGAGGATTTATGGAATCTGT<br/> TGCAGTATCACGTAATACTACTTTCGATAACGAAGCTCCAGGATTTCCACCAGCTAAGCACAGAAGTGAAGACATTAAAAA<br/> CCTTAGCTCAGAAAAAAAAAAAAAAAAAAAAAAAAAAAA</p>                              |

Table S11

|                   |                                                                                                                                                                                                                                                                                                                                                                                                                                                                                                                                                                                                                                                                                                                                                                                                                                                                                                                                                                                                                                                                                                                                             |
|-------------------|---------------------------------------------------------------------------------------------------------------------------------------------------------------------------------------------------------------------------------------------------------------------------------------------------------------------------------------------------------------------------------------------------------------------------------------------------------------------------------------------------------------------------------------------------------------------------------------------------------------------------------------------------------------------------------------------------------------------------------------------------------------------------------------------------------------------------------------------------------------------------------------------------------------------------------------------------------------------------------------------------------------------------------------------------------------------------------------------------------------------------------------------|
| <p>ERCC-00148</p> | <p>GGGAATTCATCTCCATTTGGTCACGTTTACAACCGGAGTAGACGGCCATAGCAGGAGGGGTGTGCGACAGGCAGGAAGCTCT<br/> CGCGGGGTCCAAGCATTGCTGCAATGGGCGTCCTTGCTCGATGTTGACCCGAAGCTCTAACTGCATTTCAAGTCCGAATCTCT<br/> AGATATCTCGAGAGCCAATGGTTAAGGAAGGGGCGTCAATTTTGC GCGGACACGCTGCAGGATGTAATGATTAAGCCGTAGTT<br/> GAATTTATGGAGCGGTGCCCGGAAAGGTATAAATCGGAGGCAGGGGTTTACGGCGTCAGGATAGTTCATAGCGTACGCAGA<br/> ACGAGAACAAGTGAGACGTGTATAGTTGCCATGCTGAGTAGACCTGGCGTCTACCCCTCCAAACGCATTCTTATGGCAAATG<br/> GAAGTAGCTTCCACAGTTTGTAAACAAGCCGTGCCTGCGCATGTTATTTACCAATGGAGAATCGAAAAAAAAAAAAAAAAAAAA<br/> AAAA</p>                                                                                                                                                                                                                                                                                                                                                                                                                                                                                                                                                                             |
| <p>ERCC-00150</p> | <p>GGGAATTCAGCTTGATGTGACATCACGTCCCAATCAATTTGGTTTTACTCCCCTCGATTATGCGGAGTTATCAGTAAGAGCGG<br/> GTACCGTTCTGCTGAATGCACTATGAGGGCGACCCTTGATCTTCATTTCGTTCCATAGATGCAAAATACCCGGGTACTAGTTGGC<br/> GAAGTTTGGCTAAAAGATTGCCCACTTACTAGGTGACTGTTAACTAGAAAAGTTGCATGAGGCTGGTAAGTGAGGGGCTCAGTGA<br/> AACAGGATACACCGTACCGTGACGATTCCCGTGTGGGCTTGACATTCAGCCAGCCTCCCGCTTGTACAGAGGCAGACTGTCCG<br/> ATGCC TAGTATGTTCACTATAACGATTTCTTGGGCTAGCTAGGTGTCTTGACCCCATATTTCCAAAGATCCGAACCTGCTTGTAC<br/> TTATCAGTACGAGTTGATGCTCTTGGGGTACCTATTTTTTGGATCCGATAGTATTGGTCTGGCGTGTCTCGTAACCCCGGGC<br/> ACTAGATTATGGTGAATGGTGTGTACACACTACTTGACGGGGCGTTACCATTTTTCAGGTGGGCACAAATAGCTAAAGCCTCGT<br/> CCGCATTACGCCCCATGGCTCACGTCTCAGAGGAGGCTAGCTCGAGGTCACCCATAAGGGATTACGGAGTTACACCCATAGTA<br/> ACAGACGGAAATTGTTGATAACAGATAGTTAATACGCCTTGGCTGAGGAGACCAACGGACTTCAAAAAAAAAAAAAAAAAAAAA<br/> AAAA</p>                                                                                                                                                                                                                                                                                        |
| <p>ERCC-00154</p> | <p>GGGAATTCCTCACTAGATCAGAAGTCTCCCACTCGAGACTAATCTTGGACTATCTATGAGCACCTATTGCGCTGTGGAAGATTG<br/> CCCCTAGGTCTCTGGCGGCTCCGATTGCGGGATGAACTGGTGGTCCGAGGAGGCATATAGGAAACGATGGGCACGCGCTATT<br/> CAGACGTTATTTGGTATGGAGTAAGAGGCCGAAACTGGGCTCGATTGATGGATACTGATCAGTCAACTCAAGCGAGGATATC<br/> CATACCACCGACGGTATGGTCATTAATACCCAGTATTGACTAGTCGGAGGTCTAATTTGGAACGTATTCGCCGCACACACG<br/> AGATTCACTTACATGGACGTGAAGATTGATCGCCGGGCGACTATTATTGCACGACCTTCGCCTGCCCTCAGCTGCGCCCTTTT<br/> TGTCCACGACGCAGGCTGGACCAAGCAGCCGAGGCTGCGCTCCGGCATCAAAGTCCACGAGTTACAGCCAGCGGGTTTTAAGG<br/> GGGTATTAGCATCTCGAGTGAGTAAAAAAAAAAAAAAAAAAAAAAAAAAAA</p>                                                                                                                                                                                                                                                                                                                                                                                                                                                                                                                               |
| <p>ERCC-00156</p> | <p>GGGAATTCACAAGAATCCCTGCTAGCTGAAGGAGGGTCAAAC TATAACACCTTTAGCATTTCGTACAGGCAGGCTAAGTGAAT<br/> ACTAACCACCGGCAGCCCGTTGTAGTAACGTTGACCCCTGGCTCGGAGACATTTGGTGTGCTAGTACTAGGTGACTGGTA<br/> CCGATTCATAGGTCGCCATTCTCTTATCGAGAGCCCGAGGTAGACTATCTTCCAGATGATGCCATACGTTCACTCAATCGCG<br/> CGGCATGCACGGTGGGGCTACGAACTTGCTATCCATAGGCTCTAGATGTGGTAGAAAATGCTGCAGGGGTTCTGTGCAATTT<br/> GCTCGGCAACCGTGGCCGTGTATGCTTTTATATCCCGCGGTGTGATCTAGCCTTCTCGCCATATGAGGGCGCTGAGCATAGA<br/> CCCAAACCCGACTAGTCGAATCTTAGGGTTGTATGCTAGAACGGCATGGTATAAGCCGTGCTCAAAAAAAAAAAAAAAAAAAAA<br/> AAAA</p>                                                                                                                                                                                                                                                                                                                                                                                                                                                                                                                                                                               |
| <p>ERCC-00157</p> | <p>GGGAATTCGGTCTTTGTACCTCCGTCAATTTGTATTAGAACCCGTGAAGGCCCAAGTAACAGGCCAGGGTTAACATGTACG<br/> GAACATACTCCTTCCACGGAAGATTGGGGATGAAAGTTGATACCCAACTTCATTAACACAAAGGCGATGTGGGCCGAGTACT<br/> GTGCTTACACCAACAGGGCGGCTCAACTGGGTTGGTAGCCAGCACTAGCTTATTCACAATTAAGGCCGTATGCATTTCTACTGC<br/> TTATCCGGTGGTATTGCAGCCAGGGCGGAAGTGAACACGCTTGTACGATGTGTTTGCATAAGCGGTTACCACAGGCGCTACT<br/> CTCGTCGATAGCCGACTACTAATATTCAGCCGGCGCCGGTAGATAGCGAGGCTTTGGGGGTAGCTTTAAGTGCGGTCTAGGCT<br/> CAGTTGACGATACTTACTTAGGCAGGGTTACAACCCTTATGATGGGGTATGAGGCACGTGGCCATTCATCCGGACCCGATGCT<br/> GTCGTGCTTCTCGTTGGCAATAGCGCGGATTAGTACAGGTGACTAGTTCAGCTGTTGTTTCGGATTCCAAGTAAGCTCGCATAG<br/> AGCTGGACTTCTCGGAACGGTCTGACGCATTCTGCATCAATACGCGGCACCGGGGTCCGATAGCATCTCGCCTTAGATCC<br/> GGCGGGGATACTTGGTCAAAGCTCACTACGGGACTAGAGTGGCTAGTGCAGATGCGCAGCGCAGATATGCTATACGAGATGA<br/> GCTTCAAATTCATGGAGTTATGACGATATAACGCTAGGATCTGACGCAGTGACACCGGTCGTGTGACAACCTGGGCTTTAAGTG<br/> AGGCATCAGAAGTATACTTTAATGGTGGCGTCCCAAATCCCGATCTTGCCACGATTGCCAAGCCGTGATGTTAGAGGCG<br/> GTCACAGCAAACCTCAGTTTACCGGTTGATGATTATACGATGCCGGAGCGAACGACTACGCTCGAAGTTTGGTTATCTAGA<br/> GCACGTCAAAAAAAAAAAAAAAAAAAAAAAAAAAA</p> |

Table S11

|                   |                                                                                                                                                                                                                                                                                                                                                                                                                                                                                                                                                                                                                                                                                                                                                                                                                                                                                                                                                                                                                                                                                                                                                                                                                                                                |
|-------------------|----------------------------------------------------------------------------------------------------------------------------------------------------------------------------------------------------------------------------------------------------------------------------------------------------------------------------------------------------------------------------------------------------------------------------------------------------------------------------------------------------------------------------------------------------------------------------------------------------------------------------------------------------------------------------------------------------------------------------------------------------------------------------------------------------------------------------------------------------------------------------------------------------------------------------------------------------------------------------------------------------------------------------------------------------------------------------------------------------------------------------------------------------------------------------------------------------------------------------------------------------------------|
| <p>ERCC-00158</p> | <p>GGGAATTCGAGCTCTTTCAACAGATCATGGAACACGGGAGAAATAAACATTTGGATAGAAAATGTAACATTTAAAAATGATG<br/>         CAAAATCATATTCCTTTAATTTAACGAATCTTAATATATGGGCAGTAAATAAATCTGCTTATGAGTTGTATTGGAATCCATTT<br/>         AACAAATCTATCTGGATAGATGGGAGTAATTACACTATAACTCCAAATATTGACATACCTCCAGGAGAAGTATGGAACCTCAA<br/>         AACCTACAACCTTCACATTTAGTGGAGTTCCAATCGTTTGGCAAACCTGCTCATTACACTGTCAAAAAAAGATTATATCCTTT<br/>         TAAATGAAGTAAGTCAAATAGGAAGTTCCCTATGTTGTTGTTGAGGAGATTTATGTTGTGGGTAGTTATTTGATTAAGGTGACT<br/>         AAGCATATTGTTCCGGATGCGGATGGGACTTATGATATTTATATAGTTGTGGAGAATATTGGTAGTGTGAAGACTCCTGAGTA<br/>         TGTGTATGTTTATGATTTGATTCCTAAGAACTTCACCGTCTCAGATGAGTGGGTAAATCAATCAAGTATGTTGATTTGCTGAAG<br/>         GAAATCACACCATTACAACAAATCCAAGGTATAATTTAAGCATGTGGTGGGCGTTACATGCAATATATCCAGGAGCAGATGGG<br/>         GACGGTAACTGGAACGACACTGCTGAAATACTTGCAAATAAACAGTAGTCATACACTACAACTAAACGGAACCTGGCGAATT<br/>         CTACCCAAGCGACGCATTTATCGTTGGTATCGACCCTACAACTCACTACTACCAACAACCTCACCAAAAATAACAACAGTAG<br/>         CCGGAACAGTAGAAAACAACCTTTGAGATATTTTTAATACTGATAAACGTTATCTTTGGATTAGGTATATTAACAAAGAGGAAT<br/>         ATAAGGAATAATAAATAAAGTTGGGGGATGATGATGAAGAGATTTGCATTACTCTTTATTTTCTTGCATTTATAACACCACT<br/>         TTTGCAGATGTTGAGGAAAAAAAAAAAAAAAAAAAAAAAAAAAA</p> |
| <p>ERCC-00160</p> | <p>GGGAATTCCTTGGTTTGAATCAAATTAATAGATTGCATGCAGAAGTAGGGCTTTACAAGTTTGTTCCTAATTCGGTTG<br/>         AACAAATAGCGAATGTATGATGGTCGGTCATTGCCGCAACCTGAAGCAGTGAGCGTGGTTGAGTAACCACGTAAGTCC<br/>         AAGGATGGTTGCAGTAGCTAGCTCAATTGCCATTGCTGGAATAGTGTGCGTAAACCACGCACCGGGGAGCCGCTTTTCGTTGC<br/>         GATAACCTCATATAGTCCCAGTCTCGACGCGAGCACCTGCAGCGTAATTAATAAGGTCAGGCTATGATTCACCACCGTGTAG<br/>         GAGTTATGCGCCTTATCGCGAAGGTAGTTACTCTTGCCAGTGGGCATGAAATTGCGAGCTTGCCCTAGTAGCGTTAGTACCGT<br/>         CATAAGCCACTCTAAGAGATCGAAATTTTATACAGTAGTACTAACAGCAGACCTGCAATATCAAAGTTATAAGCGCGTCGACA<br/>         CGCCTCGTCTAAGAAAACTACTTCCATTAAGTTTCGAGGACAAATGCGGTCTGATTGAGTCTATAGCGAGGCCATTGCAGT<br/>         GTGGTCTGCCGTGGTCCGCTCGATAATACCATGATAACTACTGACTGCGCAGTTGTAGCGACCGCAATGGGGAGTGTGTGTTT<br/>         TTTATTTCAACTGCGTGGCTTATCCTACTTAGGAGTTGTGGATACCAGATTATCTCGCGGTGAAAAAAAAAAAAAAAAAAAA<br/>         AAAA</p>                                                                                                                                                                                                                                                                                                                                                         |
| <p>ERCC-00162</p> | <p>GGGAATTCCTCCACAGATTCCCATGTGTCCAATTCTGAATATCTTTCCAGCTAAGTGCTTCTGCCACCAGCAACAACCTATGT<br/>         TGTATTTGTTGCTTAATATACCTCTAAATTTGCTATCTTCAATGCCTTCTGGATATTTTGCTGATGTAACCTGTTACTGACCTT<br/>         GCCCTCTCCTTGGCAAACAACCTCTATTCCCATTGCCTCCAAACCAGCCCTTGTGCTTTTGCTAATCTCTCATGTCTTTTAA<br/>         CCTATTCTCGATTCTTCTCTAAAATAAATCTAATGCAACATTTAAGGCATAGGTTAAATTAACCTGATGGTGTGTATGGGG<br/>         TTTGTTTTTCTCTTCATAGTATTTTTTATAAGCCAATAAATCTAAGTAGAAACCAACTTTGTCATCATTCTTCTAATAACT<br/>         TCCCATGCCTTTTCACTGACTGTTATTGCAGCCAATCCTGGTGGAGCTGCCAAACATTTTTGAGAACCAGTAACACAGATATC<br/>         ATGTGGAATAAAAAAAAAAAAAAAAAAAAAAAAAAAAA</p>                                                                                                                                                                                                                                                                                                                                                                                                                                                                                                                                                                                                                |
| <p>ERCC-00163</p> | <p>GGGAATTCATAGACTAGCCTGCCGGTCAATAACTGATGACGCGGAGTCAACCTGATAACCCATAGCGGAACAGTCTAACCTAC<br/>         GCGAGATACGTCTTACCGCACATAGGTAACCTATTCGTGACTAGCAGGCCTTATTCCGGTGCTATGAGTATCTTACCTGGTCT<br/>         AGGTATCTAATTCGTGGGTGCGGTACTACATTCGTGCGATGGGTCTCGCTTCGTCTATGAGGTCTCGTCTTCGTGAGTGCAA<br/>         TGTATCCGAAGTCGTAGTGATAATATGGAAC TAGGCGGATTTGACGAACGTATGCCGCATATTCGGAACGTGCGCTGGAAAT<br/>         TCGCCACCTAGATCGAAATTATCGGAACCTCGTCGCTTATTTACGAACCTTGGGAGCCGTTCTAAAGCTGAGTCTGGTTTCTT<br/>         ATTAGCGAGGAGCATTTCGTGAATACTGAGCCGAATATCGTAAGACACCCGCGAGCGACTGTAAACTAATCGGGGAACCTATT<br/>         ATAGGGCCGGTCCAGGTCTTGAACGACGTAAAAAAAAAAAAAAAAAAAAAAAAAAAA</p>                                                                                                                                                                                                                                                                                                                                                                                                                                                                                                                                                                                          |
| <p>ERCC-00164</p> | <p>GGGAATTCAGGAGCTCCAGTAGTTTTCCCTCAAAAATTCCTGATAAGATTTCAACTTTATCCTCTTCTTTTCTTGGTGTGA<br/>         GAAGATGCTCTGCCCTGGTCTTCTCCTGTCAAGCTCTTTTGGATATCCTCTTCAGATAAAGGCAGATTAGTTGGACATCCAT<br/>         CAACAACCTGCTCCAACAGCCTTTCCATGACTTTCTCCAAAACCTGTAACCTCTAAACATATCCCCATAGGTGTTCAATTAATGTC<br/>         ACCAAAAATTTTTAATTGCTTAGTTTTACATTTAAAATAAAAAATTAATAAGTCAAAAAATAAAAAAGGTTTATCTGTAGAGA<br/>         ACATCCAAGTGTGCTGGTTCCCTAACTTTAACTTTCTTTTCTCCATAATCTTCTCAACTGCCTTTCTAAAGTCATCCATTGT<br/>         TACATAGTCCCTTAACTCCCTAATTGCATTCATCCCTGCCTCTGTGCAGATTGCCTTTAACTCAGCCCCTACACATCCTTCAG<br/>         TCATCTTAGCTATTTCTTCTAAATTGACATCTTCCGCTAAATTCATCTTTCTTGTATGAATCTTCAATATCTCCAATCTACCC<br/>         TTCTCATCAGGAGCTGGGACTTCTATGATTCTATCAAATCTTCCAGGTCTTAATATTGCAGGGTCTAAAATGTCAGGCCTGTT<br/>         TGCGGCCCAATTATCTTAACATCTCCCCTTGCATCGAATCCATCCATCTCTGCCAACAACTGCATTAATGTTCTCTGAACTT<br/>         CCCTATCTCCACCAGTTAAAGCGTCTGTTCTTTGCTGCAATAGCATCAATCTCATCTATGAATATGATTGAAGGAGCTTTT<br/>         TCTTTAGCCAATTTGAATATATCTTTAACTAACGGAGCCCCCTCTCCAATAAATCTTAAACCAATTCAGAACCAACAACCTCT<br/>         TATAAAGGTAGCATTTGTTTCTGTAGCAACAGCTTTAGCTAATAATGTCTTTCCAGTTCTGGTGGCCCGTAAAGAGAATACC<br/>         TTTTGGTGGTTAAAAAAAAAAAAAAAAAAAAAAAAAAAA</p>          |

Table S11

|                   |                                                                                                                                                                                                                                                                                                                                                                                                                                                                                                                                                                                                                                                                                                                                                                                                                                                                                                                                                                                                                                                                                                                                                                 |
|-------------------|-----------------------------------------------------------------------------------------------------------------------------------------------------------------------------------------------------------------------------------------------------------------------------------------------------------------------------------------------------------------------------------------------------------------------------------------------------------------------------------------------------------------------------------------------------------------------------------------------------------------------------------------------------------------------------------------------------------------------------------------------------------------------------------------------------------------------------------------------------------------------------------------------------------------------------------------------------------------------------------------------------------------------------------------------------------------------------------------------------------------------------------------------------------------|
| <p>ERCC-00165</p> | <p>GGGAATTCGATATGCGTTACGTGAGTCTGATAGCAGTTCACCTACCTGGATATCTGATCCACTAGCTCGATCATGCTCACCCAT<br/> AGTTTATCTGCATCACTCGTACTGAAATGCTCACATCGCAGGTAGAGCAGCATCGTAGAGCGTCAAGCTGCATCCTAGCGTCA<br/> TGAGTCATAGTACCTCATGCTCACGTGATCTACCCTAGCTGACCGCTAATGACGGCAGTGCAACCTGAGATACCGACGGCATA<br/> CTGTCGTC AACGTCAGGCAATGTGTCCGAACGGCGAGCTACGTGCCTCACGGAGTAATCGCGTCCCTCTAGGTATAGTGCCG<br/> TCGGTTCAGGTCATATGTGCGGGTCTGCACATATCACGGACGTATCGCTATCAGACGGACGCTCTCGGACCTAAACCGTAG<br/> CTCTCGGCAAGATCGTCCTCGTCTCGAATATAGCGCCCTAGTGTGCAAATGTCACCGCTATCTCGTAAGGGGTCCGTCTGTT<br/> GAGTTAGGCCTCCTCTCGTTGGATGTGAGCTCGGTTGCTGGATGGTGCAGCTTACTTCGCGTACCTGCTGTTTGCATCAGTC<br/> CTCTGCATCTATAATCGCGTATCTCTCTCTAGTAGACCATATAGCCATCTAAGCGCTCGATATTCCACCTAAGTGGCGCCTAT<br/> TGAAC TAAGTGGCAGCCGAATGGACTATCGCTCCTCGATATGTACGGATAGGCCACGGCATGTACGAGCATAAGCCGAACCTGC<br/> ACGAGCATAACCCGACACTGATCTGAGAGTCGTTAAATCATCTGCGTGTCTTAGAGCTTATCGCCATGTCTGTCAACTGTACT<br/> GTCATCCTGTAACCTGTAGCGTATGTGAAAAAAAAAAAAAAAAAAAAAAAAAAAAA</p>                                                                                                                                                                        |
| <p>ERCC-00168</p> | <p>GGGAATTCCTCAATGAACTCAGCTATTCTTCTTAACAAATAACTTTCTCCAGAAAATTCAAATGTATCATCTTCAGGATTCCAC<br/> CTAAAAACATCATGTAATATAATATCATCAATTTTTGGGTCGATTCAACAATCTCAGTTATACTCTCAGTTCTTCTAACAAA<br/> TCTTCCTTTATAAATCAATCTAACCTGCATACATATGGCATTTAGTTGTTCAAGCATAATCTTTGGAATGTTTCATTGGTTTCAG<br/> CATTCAACCTCCTTATAACTGCCTCTGGGGATTTTGCCTGTATCGTTGATAACGCCAAATGTCTCTGTAGTTATTGCTTGAAAT<br/> AATATCTTCGCTCCTCACCTCTAACCTCTCCAACAATTAATAATCTGGTCTTTGCCTTAAAGCCGTTTTTAATAAATCCAT<br/> CATAGTTATTTTCATATTCTTCTCCACCGAATCCACTTCTTGTAGTTCCAGCAATCCAGTTTTTCATGATACAACCTAATTTCTG<br/> GAGTATCCTCAATAGATACGATTTTTCATTTGAGGAAGGATGAAAAGAGAGAATGCATTTAAAAGGGTGGTTTTTCCAGTAGCT<br/> ACCTCTCCAGCAACCATAATAGAATTTTTATATTCAATGAGTAACCAAAGATATGCAAGCATCTCTGGAGAAATACTCCCATA<br/> TCTTATTAATCTGTTGGCAATATAGGAGTGTGTGTGAATTTTCTTATTGTAATGTTGAACCATATCTTGAGATATCCCTTC<br/> CAAGGGTTACATTTAGCCTGTACCATCTGGGAGAGAACCATCCACTATTGGATTAGCCAATGTTAAAGATTTTCCACACCTT<br/> TGGGCTAAGGATATACAAAACGAGTCTAATTTCTTCATCAGTTTCAAATTTTATATTTGTCTTTAAATGTTTCGTATTTTCTATG<br/> AAACACATACACTGGCTTTCCAACACCTGTGCAACTGATATCCTCCAAATTTCTCATCTTTTCATAAGAGCATCTATTTCCATA<br/> TCCAATGAGGTAAAAAAAAAAAAAAAAAAAAAAAAAAAAA</p> |
| <p>ERCC-00170</p> | <p>GGGAATTCCTATTGGTGGAGGGGCACAAGTTGCTGAAGTTGCGAGAGGGGCGATAAGTGAGGCAGACAGGCATAATATAAGAGG<br/> GGAGAGAATTAGCGTAGATACTCTTCCAATAGTTGGTGAAGAAAATTTATATGAGGCTGTTAAAGCTGTAGCAACTCTTCCAC<br/> GAGTAGGAATTTTAGTTTTAGCTGGCTCTTTAATGGGAGGGAAGATAACTGAAGCAGTTAAAGAATTAAGGAAAAGACTGGC<br/> ATTCCCGTGATAAGCTTAAAGATGTTTGGCTCTGTTTCTAAGGTTGCTGATTTGGTTGTTGGAGACCCATTGCAGGCAGGGGT<br/> TTTAGCTGTTATGGCTATTGCTGAAACAGCAAAATTTGATATAAATAAGGTTAAAGGTAGGGTGCTATAAAGATAATTTAATA<br/> ATTTTTGATGAAACCGAAGCGTTAGCTTTGGGTTATGAAACTCCATGATTTTCATTTAATTTTTTCTTATTAATTTTCTCCTA<br/> AAAAGTTTCTTTAACATAAATAAGGTTAAAGGGAGAGCTCTATGATTGTCTTCAAAAATACAAAGATTATTGATGTATATACT<br/> GGAGAGGTTGTTAAAGGAAATGTTGCAGTTGAGAGGGATAAAATATCCTTTGTGGATTTAAATGATGAAATTGATAAGATAAT<br/> TGAAAAAATAAAGGAGGATGTTAAAGTTATTGACTTAAAAGGAAAATATTTATCTCCAACATTTATAGATGGGCATATAACATA<br/> TAGAATCTTCCCATCTCATCCCATCAGAGTTTGGAGAAATTTGTATTA AAAAGCGGAGTTAGCAAAGTAGTTATAGACCCGCAT<br/> GAAATAGCAAATATTGCTGGAAAAGAAGGAATTTTGTATGTTGAATGATGCCAAAATTTTAGATGTCTATGTTATGCTTCC<br/> TTCTGTGTTCCAGCTACAACTTAGAAACAAGTGGAGCTGAGATTACAGCAGAGAAATATTGAAGA ACTCATTCTTTAGATAA<br/> TGTCTTAGGTTAAAAAAAAAAAAAAAAAAAAAAAAAAAAAAG</p>  |
| <p>ERCC-00171</p> | <p>GGGAATTCCTGGAGATTGTCTCGTACGGTTAAGAGCCTCCGCCCGTCTCTGGGACTATGGACGGGCACGCTCATATCAGGCTA<br/> TATTTGGTCCGGTTATTATCGTTCGCGGTTACCGTAATACTTCAGATCAGTTAAGTAGGGCCATATGCCTCGGGAATAAGCTG<br/> ACGGTGACAAGGTTTCCCCCTAATCGAGACGCTGCAATAACACAGGGGCATACAGTAACCAGGCAAGAGTTCAATCGCTTAGT<br/> TTTCGTGGCGGGATTTGAGGAAAACGCGACTGTTCTTTAACCAACATCCGTGCGATTCGTGCCACTCGTAGACGGCATCTCA<br/> CAGTCACTGAAGGCTATTAAAGAGTTAGCACCCACCATTGGATGAAGCCCAGGATAAGTGACCCCCCGGACCTTGAGTTTC<br/> ATGCTAATCAAAGAAGAGCTAATCCGACGTAAAGTTGCGGCGTTGATTACGCAGGATTGCGACCAAAGAACGAGAAAAAAAAA<br/> AAAAAAAAAAAAAAAAA</p>                                                                                                                                                                                                                                                                                                                                                                                                                                                                                                                                                                                     |



Table S12

| Sample                         | Method        | Number Reads (millions) | min density | min sum | min value | max width | min width | min pos with data |
|--------------------------------|---------------|-------------------------|-------------|---------|-----------|-----------|-----------|-------------------|
| Comparison (K-562)             | CAGE          | 20                      | 5.4         | 81      | 1         | 300       | 3         | 0                 |
| Comparison (K-562)             | RAMPAGE       | 20                      | 4           | 60      | 1         | 300       | 3         | 0                 |
| Comparison (K-562)             | STRT          | 20                      | 8.8         | 132     | 1         | 300       | 3         | 0                 |
| Comparison (K-562)             | Oligo capping | 20                      | 4           | 60      | 1         | 300       | 3         | 0                 |
| Comparison (K-562)             | NanoCAGE-XL   | 6.9                     | 9.2         | 138     | 1         | 300       | 3         | 0                 |
| Comparison (K-562)             | GRO-cap       | 20                      | 7.2         | 108     | 1         | 300       | 3         | 0                 |
| Comparison (MCF-7)             | CAGE          | 13                      | 9.2         | 138     | 1         | 300       | 3         | 0                 |
| Comparison (MCF-7)             | Oligo capping | 13                      | 3.4         | 51      | 1         | 300       | 3         | 0                 |
| Comparison (mouse hippocampus) | CAGE          | 13                      | 2.4         | 36      | 1         | 300       | 3         | 0                 |
| Comparison (mouse hippocampus) | STRT          | 13                      | 6.6         | 99      | 1         | 300       | 3         | 0                 |
| Reproducibility (K-562)        | CAGE          | 7                       | 2           | 30      | 1         | 300       | 3         | 0                 |
| Reproducibility (K-562)        | RAMPAGE       | 5                       | 1           | 15      | 1         | 300       | 3         | 0                 |
| Reproducibility (K-562)        | STRT          | 5                       | 3           | 45      | 1         | 300       | 3         | 0                 |
| Brain-related human samples    | CAGE          | 13                      | 3.2         | 48      | 1         | 300       | 3         | 0                 |
| FANTOM5 (Temporal, Occipital)  | CAGE          | 10                      | 2           | 30      | 1         | 300       | 3         | 0                 |
| FANTOM5 (Parietal)             | CAGE          | 6                       | 2           | 30      | 1         | 300       | 3         | 0                 |
| FANTOM5 (iPS, Frontal Adult)   | CAGE          | 20                      | 5.4         | 81      | 1         | 300       | 3         | 0                 |
